1 **Short-Term Synaptic Dynamics Control the Activity Phase of**  
2 **Neurons in an Oscillatory Network**

3

4 **Abbreviated Title:** Synaptic dynamics influence activity phase of oscillatory neurons

5

6 **Authors:** Diana Martinez<sup>1\*</sup>, Haroon Anwar<sup>1</sup>, Amitabha Bose<sup>2</sup>, Dirk Bucher<sup>1</sup>, Farzan  
7 Nadim<sup>1,2</sup>

8 1 Federated Department of Biological Sciences, New Jersey Institute of Technology  
9 and Rutgers University, Newark, NJ 07102.

10 2 Department of Mathematical Sciences, New Jersey Institute of Technology, Newark,  
11 NJ 07102.

12 \* Current Address: Department of Biomedical Sciences and Dalton Cardiovascular  
13 Research Center, University of Missouri, 134 Research Park Dr., Columbia, MO  
14 65211, USA

15

16 **Corresponding Author:** Farzan Nadim, New Jersey Institute of Technology,  
17 Department of Biological Sciences, 323 Martin Luther King Blvd, Newark, NJ 07102,  
18 Phone (973) 596-8453, Email: [farzan@njit.edu](mailto:farzan@njit.edu)

## 19 **Abstract**

20 In oscillatory systems, neuronal activity phase is often independent of network  
21 frequency. Such phase maintenance requires adjustment of synaptic input with  
22 network frequency, a relationship that we explored using the crab, *Cancer borealis*,  
23 pyloric network. The burst phase of pyloric neurons is relatively constant despite a >2-  
24 fold variation in network frequency. We used noise input to characterize how input  
25 shape influences burst delay of a pyloric neuron, and then used dynamic clamp to  
26 examine how burst phase depends on the period, amplitude, duration, and shape of  
27 rhythmic synaptic input. Phase constancy across a range of periods required a  
28 proportional increase of synaptic duration with period. However, phase maintenance  
29 was also promoted by an increase of amplitude and peak phase of synaptic input with  
30 period. Mathematical analysis shows how short-term synaptic plasticity can  
31 coordinately change amplitude and peak phase to maximize the range of periods over  
32 which phase constancy is achieved.

33 150/150

## 34 **Introduction**

35 Oscillatory neural activity is often organized into different phases across groups  
36 of neurons, both in brain rhythms associated with cognitive tasks or behavioral states  
37 (Hasselmo et al., 2002; Buzsaki and Wang, 2012; Buzsaki and Tingley, 2018), and in  
38 central pattern generating (CPG) circuits that drive rhythmic motor behaviors (Marder  
39 and Bucher, 2001; Marder et al., 2005; Grillner, 2006; Bucher et al., 2015; Katz, 2016;  
40 Stein, 2018). The functional significance of different phases in the latter is readily  
41 apparent, as they for example provide alternating flexion and extension of limb joints,  
42 and coordination of movements between joints, limbs, and segments (Krantz and  
43 Parks, 2012; Grillner and El Manira, 2015; Kiehn, 2016; Le Gal et al., 2017; Bidaye et  
44 al., 2018). A hallmark of many such patterns is that the relative timing between neurons  
45 is well maintained over a range of rhythm frequencies (Dicaprio et al., 1997; Hooper,  
46 1997b, a; Wenning et al., 2004; Marder et al., 2005; Grillner, 2006; Mullins et al., 2011;  
47 Le Gal et al., 2017). If the latency across different groups of neurons changes  
48 proportionally to the rhythm period, phase (latency over period) is invariant, in some  
49 cases providing optimal coordination at all speeds (Zhang et al., 2014).

50           The ability to maintain phase arises from central coordinating mechanisms  
51 between circuit elements, as it is present in isolated nervous system preparations, but  
52 the underlying cellular and circuit mechanisms are not well understood. Constant  
53 phase lags between neighboring segments in the control of swimming can be  
54 explained mathematically on the basis of asymmetrically weakly coupled oscillators,  
55 but the role of intrinsic and synaptic dynamics within each segment is unknown (Cohen  
56 et al., 1992; Skinner and Mulloney, 1998; Grillner, 2006; Mullins et al., 2011; Zhang et  
57 al., 2014; Le Gal et al., 2017).

58           The pyloric circuit of the crustacean stomatogastric ganglion (STG) has inspired  
59 a series of experimental and theoretical studies of cellular and synaptic mechanisms  
60 underlying phase maintenance. The pyloric circuit generates a triphasic motor pattern  
61 with stable phase relationships over a wide range of periods (Eisen and Marder, 1984;  
62 Hooper, 1997b, a; Bucher et al., 2005; Goillard et al., 2009; Tang et al., 2012; Soofi et  
63 al., 2014). Follower neurons burst in rebound from inhibition from pacemaker neurons  
64 (Marder and Bucher, 2007; Daur et al., 2016), and post-inhibitory rebound delay scales  
65 with the period of hyperpolarizing currents (Hooper, 1998). Voltage-gated  
66 conductances slow enough for cumulative activation across cycles could promote such  
67 phase maintenance (Hooper et al., 2009). Similarly, short-term depression of graded  
68 inhibitory synapses is slow enough to accumulate over several pyloric cycles, meaning  
69 that effective synaptic strength increases with increasing cycle period (Manor et al.,  
70 1997; Nadim and Manor, 2000).

71           Theoretical studies have shown that short-term synaptic depression, by  
72 increasing inhibition strength with cycle period, should promote phase maintenance  
73 (Manor et al., 2003; Mouser et al., 2008), particularly in conjunction with inactivating (A-  
74 type) potassium currents (Bose et al., 2004; Greenberg and Manor, 2005), which  
75 control the rebound delay (Harris-Warrick et al., 1995b; Harris-Warrick et al., 1995a;  
76 Kloppenburg et al., 1999). These predictions remain experimentally untested.

77           Additionally, postsynaptic responses also depend on the actual trajectory of  
78 synaptic conductances, which are shaped by presynaptic voltage trajectories and  
79 short-term synaptic plasticity (Manor et al., 1997; Mamiya et al., 2003; Zhao et al.,  
80 2011; Tseng et al., 2014). If amplitude, duration, and trajectory of synaptic  
81 conductance determine rebound delay, phase maintenance necessitates all three of  
82 these parameters to change with cycle period in coordination. We used the dynamic

83 clamp technique to exhaustively explore the range of these parameters and  
84 understand how the coordinated changes in synaptic dynamics determines the phase  
85 of follower neurons in an oscillatory circuit. Our findings are consistent with a  
86 mathematical framework that accounts for the frequency dependence of amplitude and  
87 peak phase of the synaptic conductance.

## 88 **Results**

### 89 *Phase maintenance and latency maintenance*

90 The firing of neurons in oscillatory networks is shaped by a periodic synaptic  
91 input. The relative firing latency of such neurons is often measured relative to a defined  
92 reference time in each cycle of oscillation, and is used to determine the activity phase  
93 of the neuron (see, e.g., Belluscio et al., 2012). For example, in a simple network  
94 consisting of a bursting oscillatory neuron driving a follower neuron (Fig. 1A1), at a  
95 descriptive level, the latency ( $L$ ) of the follower neuron activity relative to the onset of  
96 the oscillator's burst onset may depend on the oscillation cycle period ( $P$ ). In response  
97 to a change in period (say, to  $P_2$ ), the follower neuron may keep constant latency ( $L_2 =$   
98  $L$ ), or constant phase, i.e., modify its latency proportionally to the change in period  
99 ( $L_2/P_2 = L/P$ ; Fig. 1A2). However, in many oscillatory systems, for example the pyloric  
100 circuit (Hooper, 1997b, a), the relationship between  $L$  and  $P$  falls between these two  
101 extremes. A sample recording of the bursting activity of the lateral pyloric (LP) neuron  
102 in response to controlled changes in the pyloric cycle frequency demonstrates such a  
103 relationship (Fig. 1B and 1C).

### 104 *The burst onset time of the isolated LP neuron depends on the temporal dynamics of 105 its input*

106 The LP neuron does not have intrinsic oscillatory properties, but oscillates due  
107 to the synaptic input it receives from the pacemaker anterior burster (AB) and pyloric  
108 dilator (PD) neurons, and the follower pyloric constrictor (PY) neurons (Fig. 2A). The  
109 burst onset phase of the LP neuron ( $\phi_{LP} = \Delta t / P$ ; Fig. 2A) is shaped by the interaction  
110 between synaptic inputs and the neuron's intrinsic dynamics that influence post-  
111 inhibitory rebound. We measured an overall burst onset phase of the LP neuron of  $\phi_{LP}$   
112  $= 0.34 \pm 0.03$  (N=9).

113 As a first-order quantification, we measured how inputs to the LP neuron  
114 interact with its intrinsic properties to determine the timing between its bursts, in the

115 absence of network oscillations. To this end, we synaptically isolated the LP neuron  
116 (Fig. 2B) and drove it with a noise current input (see Methods). In response to the  
117 noise input, the LP neuron produced an irregular pattern of spike times, which included  
118 a variety of bursting patterns with different spike numbers (Fig. 2C). We were  
119 interested in the characteristics of inputs producing different burst onset latencies.  
120 However, unlike a periodic input, noise input does not provide a well-defined reference  
121 point to measure the burst onset latency. We therefore categorized bursts with respect  
122 to the preceding inter-burst intervals (IBIs) during which no other action potentials  
123 occurred. We classified these IBIs in bins (300, 500, 700 and 900 ms) and tagged  
124 bursts based on the IBI values (Fig. 2C). We characterized the driving input leading to  
125 bursts with specific IBIs by burst-triggered averaging the input current ( $I_{BTA}$ ; an example  
126 shown in Fig. 2D). Our analysis produced a single  $I_{BTA}$  for each of the four IBIs in each  
127 preparation (N=23).  $I_{BTA}$ 's of each preparation were first normalized in amplitude by the  
128  $I_{BTA}$  amplitude at IBI = 300 ms (Fig. 2E; average shown in Fig. 2F) to examine how  
129 peak amplitude ( $I_{peak}$ ) varied with IBI. These data were then normalized in time (Fig.  
130 2G) to examine the effect of IBI on peak phase ( $\Delta_{peak}$ ) and the rise ( $slope_{up}$ ) and fall  
131 ( $slope_{down}$ ) slopes of the input current across preparations. We found that IBI had a  
132 significant effect on  $I_{peak}$ ,  $\Delta_{peak}$ ,  $slope_{up}$  and  $slope_{down}$  (all one-way RM-ANOVA on  
133 ranks; data included in Figure 2-source data). In particular, larger IBIs corresponded to  
134 larger  $I_{peak}$  values (Fig. 2F-2H;  $p < 0.001$ ,  $\chi^2 = 65.87$ ) with smaller (more advanced)  $\Delta_{peak}$   
135 (Fig. 2I;  $p < 0.001$ ,  $\chi^2 = 41.35$ ). The change in  $\Delta_{peak}$  was due to a decrease in  $slope_{up}$   
136 ( $p < 0.001$ ,  $\chi^2 = 65.25$ ), whereas  $slope_{down}$  did not vary as much (Figs. 2J-2K;  $p = 0.002$ ,  $\chi^2$   
137 = 14.77).

### 138 *The burst onset phase of the LP neuron oscillation depends on its synaptic input*

139 Injection of noise current revealed that the timing of the LP response is  
140 exquisitely sensitive to the duration and amplitude of inputs. In the intact system, the  
141 primary determinant of input duration and amplitude is the network period ( $P$ ), as  
142 increasing  $P$  increases both presynaptic pacemaker burst duration (Hooper, 1997b, a)  
143 and synaptic strength (Manor et al., 1997; Nadim and Manor, 2000). To explore the  
144 effect of the duration and strength of the synaptic input, we used dynamic clamp to  
145 drive the LP neuron with a realistic synaptic conductance waveform.

146 We constructed this realistic waveform by measuring the synaptic current input  
147 to the LP neuron during ongoing pyloric oscillations (Fig. 3A). These measurements

148 showed the two components of inhibitory synaptic input, those from the pacemaker AB  
149 and PD neurons (left arrow) and those from the follower PY neurons (right arrow). In  
150 each cycle, the synaptic current always had a single peak, but the amplitude and  
151 phase of this peak showed variability across preparations (Fig. 3B, average in blue).

152 The realistic conductance input was injected periodically with strength  $g_{max}$  (Fig.  
153 3C). For any fixed  $g_{max}$ ,  $\varphi_{LP}$  decreased as a function of  $P$  (Fig. 3D), i.e., the relative  
154 onset of the LP burst was advanced in slower rhythms. In contrast to the effect of  $P$ , for  
155 any given  $P$ ,  $\varphi_{LP}$  increased sublinearly as a function of  $g_{max}$  (Fig. 3E). Fig. 3F combines  
156 the simultaneous influence of both parameters on  $\varphi_{LP}$ . The results shown in Fig. 3D  
157 indicate that the LP neuron intrinsic properties alone do not produce phase constancy.  
158 However, level sets of  $\varphi_{LP}$  (highlighted for three values in Fig. 3F), indicate that phase  
159 could be maintained over a range of  $P$  values, if  $g_{max}$  increases as a function of  $P$ . This  
160 finding was predicted by our previous modeling work, in which we suggested that  
161 short-term synaptic depression promotes phase constancy by increasing synaptic  
162 strength as a function of  $P$  (Manor et al., 2003; Bose et al., 2004). We will further  
163 discuss the role of synaptic depression below.

164 To clarify the results of Fig. 3, it is worth examining the extent of phase  
165 maintenance for fixed  $g_{max}$ . An example of this is shown in Fig. 4A (turquoise plots). A  
166 comparison of these data with the theoretical cases in which either delay or phase is  
167 constant suggests that the LP neuron produces relatively good phase maintenance, at  
168 least much better in comparison with constant delay. However, this conclusion is  
169 misleading because, in these experiments, the duty cycle of the synaptic input was  
170 kept constant. Therefore, most of the phase maintenance is due the fact that the  
171 synaptic input keeps perfect phase. In fact, if the reference point measures phase  
172 relative to the end –rather than onset– of the PD burst (Fig. 4B), phase maintenance of  
173 the LP neuron is barely better than in the constant delay case (Fig. 4A, purple plots). It  
174 is therefore clear that phase maintenance by the LP neuron would require the  
175 properties of the synaptic input to change as a function of  $P$ , a hallmark of short-term  
176 synaptic plasticity (Fortune and Rose, 2001; Grande and Spain, 2005). As mentioned  
177 above, short-term plasticity such as depression could produce changes in  $g_{max}$  as a  
178 function of  $P$ . Independently of  $g_{max}$ , the peak time of the synaptic current is another  
179 parameter that could change with  $P$  and influence the timing of the postsynaptic burst.

180 We therefore proceeded to systematically explore the influence of  $P$ ,  $g_{max}$  and the  
181 synaptic peak time on  $\varphi_{LP}$ .

### 182 *A systematic exploration of synaptic input parameters on the phase of the LP neuron*

183 For a detailed exploration of the influence of the synaptic input on  $\varphi_{LP}$ , we  
184 approximated the trajectory of the (unitary) synaptic conductance in one cycle by a  
185 simple triangle (Fig. 5A), which could be defined by three parameters: duration ( $T_{act}$ ),  
186 peak time ( $t_{peak}$ ) and amplitude ( $g_{max}$ ) (Fig. 5B). This simplified triangular synaptic  
187 conductance waveform could then be repeated with any period ( $P$ ) to mimic the  
188 realistic synaptic input to the LP neuron. For a given synaptic duration  $T_{act}$ , the peak  
189 phase of the synapse can be defined as  $\Delta_{peak} = t_{peak} / T_{act}$ . The parameter  $\Delta_{peak}$  is  
190 known to vary as a function of  $P$  (Tseng et al., 2014) and, in a previous study, we found  
191 that  $\Delta_{peak}$  may influence the activity of the postsynaptic neuron, independent of  $P$  and  
192  $g_{max}$  (Mamiya and Nadim, 2004). We therefore systematically explored the influence of  
193 three parameters of the synaptic input ( $P$ ,  $g_{max}$  and  $\Delta_{peak}$ ) on  $\varphi_{LP}$ .

194 As with the realistic synaptic waveforms (Fig. 3), we used the dynamic clamp  
195 technique to apply the triangular conductance waveform periodically to the synaptically  
196 isolated LP neuron. Across different runs within the same experiment, the parameters  
197  $P$ ,  $g_{max}$  and  $\Delta_{peak}$  were changed on a grid (see Methods). In addition, all combinations  
198 of these three parameter values were run in two conditions in the same experiment, 1:  
199 with constant duration, i.e., constant  $T_{act}$  across different  $P$  values (C-Dur of 300 ms),  
200 and 2: with constant duty cycle, i.e.,  $T_{act}$  changing proportionally to  $P$  (C-DC of 0.3; Fig.  
201 5C). Using these protocols, we measured the effects of synaptic parameters on  $\varphi_{LP}$   
202 (Fig. 5D).

203 The LP neuron produced burst responses that followed the synaptic input in a  
204 1:1 manner across all values of  $P$  that were used (Fig. 6A1). When  $g_{max}$  and  $\Delta_{peak}$  were  
205 kept constant,  $\varphi_{LP}$  decreased as a function of  $P$  (Fig. 6A2). This decrease was always  
206 larger for the C-Dur case than the C-DC case. For both C-DC and C-Dur, this trend  
207 was seen across all values of  $\Delta_{peak}$  and  $g_{max}$  (Fig 6A3). The effect of  $P$  on  $\varphi_{LP}$  was  
208 highly significant for both C-DC (Three-Way ANOVA,  $p < 0.001$ ,  $F = 100.677$ ) and C-Dur  
209 (Three-Way ANOVA,  $p < 0.001$ ,  $F = 466.424$ ), indicating that the period and duration of  
210 the inhibitory input to the LP neuron had a significant effect on its phase.



211 Changing  $g_{max}$  produced a large effect on the level of hyperpolarization in the  
212 LP neuron, but this usually translated to only a small or modest effect on the time to the  
213 first spike following inhibition (Fig. 6B1). Overall, increasing  $g_{max}$  at constant values of  $P$   
214 and  $\Delta_{peak}$  produced a significant but only small to moderate increase in  $\varphi_{LP}$  (Three-Way  
215 ANOVA,  $p < 0.001$ ,  $F = 10.798$ ). Although increasing  $g_{max}$  produced the same qualitative  
216 effect for both the C-DC and C-Dur (e.g., Fig. 6B2),  $\varphi_{LP}$  in the C-DC case was  
217 restricted to a smaller range (Fig. 5F top vs. bottom panels). Overall, this increase was  
218 robust for most values of  $P$  and  $\Delta_{peak}$  (Fig. 6B3).

219 Increasing  $\Delta_{peak}$  for a constant value of  $P$  and  $g_{max}$  (Fig. 6C1), produced a small  
220 but significant increase in  $\varphi_{LP}$  (Three-Way ANOVA,  $p < 0.001$ ,  $F = 17.172$ ). This effect  
221 was robust for most values of  $P$  and  $g_{max}$ , for both C-DC and C-Dur (Fig. 6C2 and 6C3).

222 These results showed that all three parameters that define the shape of the  
223 IPSC influence  $\varphi_{LP}$ . Clearly, the strongest effect is the decrease in  $\varphi_{LP}$  as a function of  
224  $P$ . However,  $\varphi_{LP}$  modestly increases as a function of the other two parameters,  $g_{max}$   
225 and  $\Delta_{peak}$ . This raised the question how  $g_{max}$  and  $\Delta_{peak}$  would have to change in  
226 coordination as a function of  $P$  to counteract the effect of  $P$  on  $\varphi_{LP}$  and achieve phase  
227 constancy.

### 228 *Coordinated changes of $g_{max}$ and $\Delta_{peak}$ produce the largest effect on phase*

229 To explore how  $g_{max}$  and  $\Delta_{peak}$  might interact to influence  $\varphi_{LP}$ , we examined the  
230 sensitivity of  $\varphi_{LP}$  to these two parameters, individually and in combination, for all values  
231 of  $P$  in our data (see Methods). Sensitivity of  $\varphi_{LP}$  to these two parameters varied across  
232  $P$  values, with larger sensitivity at lower values of  $P$  (data not shown; Two-Way RM-  
233 ANOVA,  $p < 0.001$ ,  $F = 16.054$ ). For simplicity, we averaged the sensitivity values across  
234 different  $P$  values to obtain an overall measure of the influence of  $g_{max}$  and  $\Delta_{peak}$ . These  
235 results showed that, for the C-DC case,  $\varphi_{LP}$  had a positive sensitivity to  $g_{max}$  and a  
236 smaller positive sensitivity to  $\Delta_{peak}$  (Fig. 7A). The sensitivity was largest if the two  
237 parameters were varied together ( $g_{max} + \Delta_{peak}$ ) and smallest if they were varied in  
238 opposite directions ( $g_{max} - \Delta_{peak}$ ; Two-Way RM-ANOVA,  $p < 0.001$ ,  $F = 3.330$ ). Similarly,  
239 these sensitivity values were also significantly different for the C-Dur case (Fig. 7B;  
240 Two-Way RM-ANOVA,  $p < 0.001$ ,  $F = 2.892$ ), with largest sensitivity for  $g_{max} + \Delta_{peak}$  and  
241 smallest for  $g_{max} - \Delta_{peak}$ .

### 242 *Level sets of $\varphi_{LP}$ in the $P$ - $g_{max}$ - $\varphi_{peak}$ space for C-DC and C-Dur cases*



243 To search for phase constancy across different  $P$  values in our dataset, we  
244 expressed  $\varphi_{LP}$  as a function of the three IPSC parameters,  $P$ ,  $g_{max}$  and  $\Delta_{peak}$ :  
245  $\varphi_{LP} = \Phi(P, g_{max}, \Delta_{peak})$ . **Figure 8** shows heat map plots of the function  $\Phi$ , plotted for the  
246 range of values of  $P$  and  $\Delta_{peak}$  and four values of  $g_{max}$ . In these plots, phase constancy  
247 can be seen as the set of values in each graph that are isochromatic, indicating the  
248 level sets of the function  $\Phi$ . These level sets are mathematically defined as  
249 hypersurfaces on which the function has a constant value:  $\Phi(P, g_{max}, \Delta_{peak}) = \varphi_c$ . For the  
250 C-DC case, in each  $g_{max}$  section of the plot, the level sets (e.g.  $\varphi_c = 0.34$  denoted in  
251 white) spanned a moderate range of  $P$  values as  $\Delta_{peak}$  increased (**Fig. 8A1**). The span  
252 of  $P$  values across all four panels indicates the range of cycle periods for which phase  
253 constancy could be achieved by varying  $g_{max}$  and  $\Delta_{peak}$ . This range of  $P$  values  
254 (spanned by the white curves) was considerably smaller for the C-Dur case (**Fig. 8A2**).

255 For any constant phase value  $\varphi_c$ , these level sets can be expressed as

$$256 \quad P = P_{\varphi_c}(g_{max}, \Delta_{peak}),$$

257 which describes a surface in the 3D space, yielding the  $P$  value for which phase can be  
258 maintained at  $\varphi_c$ , for the given values of  $g_{max}$  and  $\Delta_{peak}$ . The level set indicated by the  
259 white curves in panel A for the C-DC case is plotted as a heat map in **Fig. 8B1** and can  
260 be compared with the same plot for the C-Dur case in **Fig. 8B2**. The range of colors in  
261 each plot (marked next to each panel) indicates the range of  $P$  values for which phase  
262 can be kept at  $\varphi_c = 0.34$ . To reveal how this range depends on the desired phase, we  
263 measured this range for all values of  $\varphi_c$  between 0.2 and 0.8 (**Figs. 8C1 and 8C2**). We  
264 found that the LP neuron could not achieve phases below 0.3 in the C-DC case (**Fig.**  
265 **8C1**), which is simply because the neuron never fired during the inhibitory synaptic  
266 current (which had a duty cycle of 0.3). Furthermore, the range of  $P$  values for which  
267 the LP phase could be maintained by varying  $g_{max}$  and  $\Delta_{peak}$  was much larger for C-DC  
268 inputs compared to C-Dur Inputs, for all  $\varphi_c$  values between 0.31 and 0.54.

### 269 *A model of synaptic dynamics could predict activity onset phase of LP neuron*

270 To gain a better understanding of our experimental results, we considered  
271 **Equations (7) and (8)**—the mathematical description of  $\varphi_{LP}$  as a function of  $P$ ,  $g_{max}$  and  
272  $\Delta_{peak}$ , for the C-Dur and C-DC cases, respectively, that we derived in the Methods  
273 section—repeated here for convenience:

$$274 \quad \varphi_{LP} = F(P, g_{max}, \Delta_{peak}) = \frac{\tau_s}{P} \ln \frac{g_{max}}{g^*} + \frac{\Delta_{peak} T_{act}}{P}, \quad (7)$$

$$275 \quad \varphi_{LP} = F(P, g_{max}, \Delta_{peak}) = \frac{\tau_s}{P} \ln \frac{g_{max}}{g^*} + \Delta_{peak} DC. \quad (8)$$

276 In the C-Dur case, described by Equation (7), the input period has the most  
 277 significant affect and  $\varphi_{LP}$  decays like  $1/P$ . In contrast, in the C-DC case, described by  
 278 Equation (8),  $\varphi_{LP}$  is bounded from below by  $\Delta_{peak} \cdot DC$  and thus behaves very differently  
 279 than in the C-Dur case. In particular, as  $P$  increases,  $\varphi_{LP}$  approaches  $\Delta_{peak} \cdot DC$  for the  
 280 C-DC case, whereas it approaches 0 in the C-Dur case.

281 Keeping  $g_{max}$  (respectively,  $\Delta_{peak}$ ) constant in these equations allows us to  
 282 obtain a relationship between  $P$  and  $\Delta_{peak}$  (respectively,  $g_{max}$ ), for which  $\varphi_{LP}$  is kept  
 283 constant at  $\varphi_c$ . Consider Equations (7) and (8) for fixed values of both  $\varphi_{LP}$  ( $= \varphi_c$ ) and  
 284  $g_{max}$ . Then these equations reduce to simple functional relationships where  $\Delta_{peak}$  can be  
 285 expressed as a function of  $P$ . In the C-DC case, for example, evaluating  $\Delta_{peak}$  from  
 286 Equation (8) produces

$$287 \quad g_{max} = g^* \cdot \exp\left(\frac{P}{\tau_s} (\varphi_c - \Delta_{peak} DC)\right) \quad (1)$$

288 Equation (12) describes how  $g_{max}$  must vary with  $P$  for the system to maintain a  
 289 constant phase  $\varphi_c$  for any given  $\Delta_{peak}$ .

290 Alternatively,  $\Delta_{peak}$  can be expressed as a function of  $P$ . In the C-DC case,  
 291 evaluating  $\Delta_{peak}$  from Equation (8) produces

$$292 \quad \Delta_{peak} = \frac{\varphi_c}{DC} - \frac{\tau_s}{DC \cdot P} \ln \frac{g_{max}}{g^*}, \quad (2)$$

293 This equation describes how  $\Delta_{peak}$  must vary with  $P$  for the system to maintain a  
 294 constant phase  $\varphi_c$  for any given  $g_{max}$ . A comparison of these two cases can be seen in  
 295 Fig. 9A, where either  $g_{max}$  (green) or  $\Delta_{peak}$  (blue) is varied, while keeping the other  
 296 parameter constant, to keep  $\varphi_{LP}$  constant at  $\varphi_c=0.34$  across different  $P$  values. (The  
 297 red curve is the depressing case, described below.) As the figure shows, phase  
 298 constancy can be achieved by varying either parameter, but each parameter produces  
 299 a different range of  $P$  across which phase is maintained.

300 In fact, Equation (13) can be used to calculate the range of  $P$  values over which  
 301 changing  $\Delta_{peak}$  (from 0 to 1) can maintain a constant phase  $\varphi_c$ . Solving  $0 < \Delta_{peak} < 1$   
 302 using Equation (13) yields

$$303 \quad \frac{\tau_s}{\varphi_c} \ln \frac{g_{max}}{g^*} < P_{DC} < \frac{\tau_s}{\varphi_c - DC} \ln \frac{g_{max}}{g^*} \quad (3)$$

304 Performing the same procedure in the C-Dur case, we find

$$305 \quad \frac{\tau_s}{\varphi_c} \ln \frac{g_{max}}{g^*} < P_{Dur} < \frac{T_{act}}{\varphi_c} + \frac{\tau_s}{\varphi_c} \ln \frac{g_{max}}{g^*}. \quad (4)$$

306 If  $\Delta P$  denotes the range of  $P$  values that respectively satisfy Equation (14) or (15), it is  
 307 straightforward to show that  $\Delta P_{DC} > \Delta P_{Dur}$  (compare black and blue curves in Fig. 9B  
 308 and 9C). To see this, note that the lower bound for each interval is the same, thus we  
 309 need to show that the upper bound for the C-DC case is larger than that for the C-Dur  
 310 case. That is,

$$311 \quad \varphi_c < DC \left( 1 + \frac{\tau_s}{T_{act}} \ln \frac{g_{max}}{g^*} \right). \quad (5)$$

312 Equation (16) is true for  $\tau_s$  and  $g_{max}$  large enough.

313 Two additional points are notable from Fig. 9B. First, the lower bound on  $\varphi_{LP}$  for  
 314 which phase constancy can occur (i.e.,  $\varphi_c$ ) is smaller in the C-Dur than C-DC case.  
 315 This is because we have assumed that in the C-DC case the LP neuron cannot fire  
 316 during inhibition (i.e., until after  $\Delta_{peak} DC$ ). Second, for  $\varphi_c$  larger than  $\sim 0.5$ ,  $\Delta P$  is larger  
 317 for the C-Dur case. This occurs because, when  $\varphi_c$  is sufficiently large, Equation (16)  
 318 can no longer be satisfied. These findings are consistent with our experimental results  
 319 described above, indicating that although phase constancy can be achieved when  
 320 either  $g_{max}$  or  $\Delta_{peak}$  increases with  $P$ , a concomitant increase of both—which could occur  
 321 for example with a depressing synapse—greatly expands the range of  $P$  values for  
 322 which a constant phase is maintained.

323 We now consider how short-term depression of the synapse—a property known  
 324 to exist in the pacemaker to LP synapse (Zhao et al., 2011)—influences phase  
 325 constancy by changing  $g_{max}$  and  $\Delta_{peak}$ . We will restrict this section to the C-DC case. A  
 326 similar derivation can be made for the C-Dur case. As mentioned in the Methods, the

327 effect of synaptic depression on synaptic strength can be obtained by Equation (11)  
328 (repeated from the Methods):

$$329 \quad g_{max} = \bar{g}_{max} \cdot s_{max}(P) \quad (11)$$

330 where  $s_{max}$  is the maximum value of  $s_d$  at the onset of the pacemaker burst:

$$331 \quad s_{max}(P) = \frac{1 - e^{-P(1-DC)/\tau_\alpha}}{1 - e^{-P(1-DC)/\tau_\alpha} e^{-DC \cdot P/\tau_\beta}}.$$

332 Note that  $s_{max}$  is a monotonically increasing function with values between 0 and 1. Its  
333 value approaches 1 as  $P$  increases, indicating that the synapse becomes stronger. In  
334 this equation,  $\bar{g}_{max}$  is constant and is chosen so that the non-depressing and  
335 depressing conductances match at  $P = 1$  s. As seen in Fig. 9A, when synaptic  
336 depression dictates how  $g_{max}$  varies with  $P$  as in Equation (11), and  $\Delta_{peak}$  varies with  $P$   
337 and  $g_{max}$  according to Equation (13), the simultaneous changes in  $g_{max}$  and  $\Delta_{peak}$  (red)  
338 greatly increase the range of  $P$  values over which  $\phi_{LP}$  is constant.

339 Returning to Fig. 9B, note that the C-DC case with depression spans a larger  
340 range of  $P$  values than the non-depressing case. Similarly, in Fig. 9C, the range of  $P$   
341 values for which phase can be maintained is larger than the non-depressing case  
342 across  $\phi_{LP}$  values, except where  $\phi_{LP}$  is so large that the depressing synapse operates  
343 outside its dynamic range.

## 344 Discussion

### 345 *The importance of phase in oscillatory networks*

346 A common feature of oscillatory networks is that the activities of different  
347 neuron types are restricted to specific phases of the oscillation cycle. For example,  
348 different hippocampal and cortical neurons are active in at least three distinct phases of  
349 the gamma rhythm (Hajos et al., 2004; Hasenstaub et al., 2005), and distinct  
350 hippocampal neuron types fire at different phases of the theta rhythm and sharp wave-  
351 associated ripple episodes (Somogyi and Klausberger, 2005).

352 Experimental studies quantify the latency of neural activity with respect to a  
353 reference time in the cycle, but in most cases, these latencies are normalized and  
354 reported as phase. Distinct neuron types can maintain a coherent activity phase,

355 despite wide variations in the network frequency (30-100 Hz for gamma rhythms, 4-7  
356 Hz for theta rhythms, and 120-200 Hz for sharp wave-associated ripple episodes).  
357 Phase-specific activity of different neuron types is proposed to be important in rhythm  
358 generation (Wang, 2010), and indicates the necessity of precise timing for producing  
359 proper circuit output and behavior (Kopell et al., 2011). For example, phase locking of  
360 spike patterns to oscillations is important for auditory processing, single cell and  
361 network computations and Hebbian learning rules (Kayser et al., 2009; McLelland and  
362 Paulsen, 2009; Panzeri et al., 2010). For brain oscillations, phase relationships may  
363 provide clues about the underlying circuit connectivity and dynamics, but a behavioral  
364 correlate of varying frequencies is not obvious. In contrast, the activity phase of distinct  
365 neuron types in rhythmic motor circuits is a tangible readout of the timing of motor  
366 neurons and muscle contractions, thus defining phases of movement (Grillner and El  
367 Manira, 2015; Kiehn, 2016; Le Gal et al., 2017; Bidaye et al., 2018). Because  
368 meaningful behavior depends crucially on proper activity phases, whether neurons  
369 maintain their activity phase in face of changes in frequency simply translates to  
370 whether the movement pattern changes as it speeds up or slows down.

### 371 *Determinants of phase*

372 In oscillatory networks, the activity phases of different neuron types depend to  
373 different degrees on the precise timing and strength of their synaptic inputs (Oren et  
374 al., 2006). Our results from noise current injections showed that the timing of the LP  
375 neuron is strongly dependent on the timing of inputs it receives. Dynamic clamp  
376 injection of realistic or triangular conductance waveforms with different periods ( $P$ )  
377 indicated that  $\varphi_{LP}$  was largely determined by the duration of the synaptic input.  $\varphi_{LP}$   
378 changed substantially with  $P$  when inputs had constant duration, but much less when  
379 inputs had a constant duty cycle, i.e., when duration scaled with  $P$ . However, our  
380 experiments also showed that inputs of constant duty cycles alone are insufficient for  
381 phase constancy.  $\varphi_{LP}$  decreased with  $P$  even with a constant duty cycle of inputs, but  
382 increased with either synaptic strength ( $g_{max}$ ) or peak phase of the synaptic input  
383 ( $\Delta_{peak}$ ). The increase in  $\varphi_{LP}$  had similar sensitivity to  $g_{max}$  and  $\Delta_{peak}$ , and therefore a  
384 larger sensitivity to a simultaneous increase in both. Consequently, it was possible to  
385 keep  $\varphi_{LP}$  constant over a wide range of cycle periods by increasing both parameters  
386 with  $P$ .

387           The fact that an increase in  $g_{max}$  with  $P$  promotes phase constancy is  
388 biologically relevant, as short-term depression in pyloric synapses means that synaptic  
389 strength indeed increases with  $P$  (Manor et al., 1997). Previous modeling studies show  
390 that short-term synaptic depression of inhibitory synapses promotes phase constancy  
391 (Nadim et al., 2003; Bose et al., 2004), largely because of longer recovery times from  
392 depression at larger values of  $P$ .

393           The case is less clear for the finding that an increase of  $\Delta_{peak}$  with  $P$  promotes  
394 phase maintenance, as we have previously shown that  $\Delta_{peak}$  in LP actually decreases  
395 with  $P$  (Manor et al., 1997; Tseng et al., 2014). On the face of it, this suggests that an  
396 increase in  $\Delta_{peak}$  is not a strategy employed in the intact circuit. However, the caveat is  
397 that such results may critically depend on the cause of the change in  $P$ , either  
398 technically and biologically. While in our current study we varied  $\Delta_{peak}$  with direct  
399 conductance injection into LP, previous results were obtained by changing the  
400 waveform and period of the presynaptic pacemaker neurons. When  $P$  is changed in an  
401 individual preparation by injecting current into or voltage-clamping the pacemakers,  
402 phase of follower neurons is not particularly well maintained. An example of this is  
403 shown in Fig. 1, where  $\phi_{LP}$  values fall between constant phase and constant duration  
404 and, additionally, all pyloric neurons show behavior that falls between constant phase  
405 and constant latencies (Hooper, 1997b, a). This may reflect that individuals are not  
406 keeping phase particularly well when the only cause of changing  $P$  is the presynaptic  
407 input. This is supported by the observation that even during normal ongoing pyloric  
408 activity, phases change with cycle-to-cycle variability of  $P$  in individual preparations  
409 (Bucher et al., 2005). However, it does not preclude the possibility that  $\Delta_{peak}$  plays an  
410 important role in stable phase relationships when  $P$  differs because of temperature,  
411 neuromodulatory conditions, or inter-individual variability (discussed below).

412           It is noteworthy that a change in the synaptic strength or peak phase with  $P$  is  
413 not peculiar to graded synapses. The fact that short-term synaptic plasticity can act as  
414 a frequency-dependent gain control mechanism is well known for many spike-mediated  
415 synaptic connections. In bursting neurons, the presence of a combination of short-term  
416 depression and facilitation in the same spike-mediated synaptic interaction could also  
417 result in changes in the peak phase of the summated synaptic current as a function of  
418 burst frequency and duration, and the intra-burst spike rate (Markram et al., 1998).

419 *Phase relationships in changing temperatures*

420 An interesting case is provided by the observation that phases are remarkably  
421 constant when pyloric rhythm frequency is changed with temperature. Tang et al.  
422 (2012) report a 4-fold decrease in  $P$  of the pyloric rhythm between 7 and 23° C. In this  
423 study, none of the pyloric phases changed significantly, and it is worth noting that  
424 under conditions of changing temperatures, the relationships between  $P$ ,  $g_{max}$ , and  
425  $\Delta_{peak}$  appeared to be fundamentally different from when  $P$  is changed at a constant  
426 temperature. Presynaptic voltage trajectories scaled with changing  $P$ , and  $\Delta_{peak}$  of  
427 postsynaptic currents was independent of  $P$ , in contrast to the decrease described at  
428 constant temperature (Manor et al., 1997; Tseng et al., 2014). Amplitudes of synaptic  
429 potentials did not change with temperature, despite an increase in synaptic current  
430 amplitudes with increasing temperature (and associated decrease in  $P$ ). This is in  
431 contrast to the positive relationship between  $g_{max}$  and  $P$  that results from synaptic  
432 depression at a constant temperature (Manor et al., 1997). Therefore, it appears that  
433 the likely substantial effects of temperature on synaptic dynamics and ion channel  
434 gating are subject to a set of compensatory adaptations different from when  $P$  is  
435 changed at constant temperature.

#### 436 *Slow compensatory regulation of phase*

437 Phase maintenance in the face of changing  $P$  in an individual animal requires  
438 the appropriate short-term dynamics of synaptic and intrinsic neuronal properties. The  
439 fact that characteristic (and therefore similar) phase relationships can also be observed  
440 under the same experimental conditions across individual preparations is a different  
441 conundrum, particularly when  $P$  can vary substantially, as is true for brain oscillations  
442 (Hajos et al., 2004; Hasenstaub et al., 2005; Somogyi and Klausberger, 2005). Phases  
443 show different degrees of variability across individuals in a variety of systems, e.g.,  
444 leech heartbeat (Wenning et al., 2018), larval crawling in *Drosophila* (Pulver et al.,  
445 2015), and fictive swimming in zebrafish (Masino and Fetcho, 2005), but in all of these  
446 cases phases are not correlated with  $P$ . In the pyloric rhythm, phases are also variable  
447 to a degree across individuals, but not correlated with the mean  $P$ , which varies >2-fold  
448 (Bucher et al., 2005; Goillard et al., 2009). This phase constancy occurs despite  
449 considerable inter-individual variability in ionic currents, and is considered the ultimate  
450 target of slow compensatory regulation, i.e., homeostatic plasticity (Marder and  
451 Goillard, 2006; Ma and LaMotte, 2007; Marder et al., 2014). Slow compensation can  
452 also be observed directly when rhythmic activity is disrupted by decentralization, and



453 subsequently recovers to similar phase relationships over the course of many hours  
454 (Luther et al., 2003). It is interesting to speculate if our findings about how synaptic  
455 parameters must change to keep phase constant would hold across individuals with  
456 different mean  $P$ . The prediction would be coordinated positive correlations of both  $g_{max}$   
457 and  $\Delta_{peak}$  with  $P$ .

#### 458 *Phase relationships under different neuromodulatory conditions.*

459 The flipside of the question how neurons maintain phase is the question how  
460 their phase can be changed. In motor systems in particular, changes in phase  
461 relationships are functionally important to produce qualitatively different versions of  
462 circuit output, for example to produce different gaits in locomotion (Vidal-Gadea et al.,  
463 2011; Grillner and El Manira, 2015; Kiehn, 2016). The activity of neural circuits is  
464 flexible, and much of this flexibility is provided by modulatory transmitters and  
465 hormones which alter synaptic and intrinsic neuronal properties (Brezina, 2010; Harris-  
466 Warrick, 2011; Jordan and Slawinska, 2011; Bargmann, 2012; Marder, 2012; Bucher  
467 and Marder, 2013; Nadim and Bucher, 2014 ). The pyloric circuit is sensitive to a  
468 plethora of small molecule transmitters and neuropeptides which affect cycle frequency  
469 and phase relationships (Marder and Bucher, 2007; Stein, 2009; Daur et al., 2016).  
470 With respect to our findings, any given neuromodulator could act presynaptically to  
471 alter  $P$ , duration, or duty cycle on the one hand, and  $g_{max}$  and  $\Delta_{peak}$  on the other. In  
472 addition, the neuromodulator could affect the postsynaptic neuron's properties and  
473 alter its sensitivity to any of these parameters. Therefore, our findings could not just  
474 further our understanding of how phase can be maintained across different rhythm  
475 frequencies, but also provide a framework for testing if and how changes in synaptic  
476 dynamics may contribute to altering phase relationships under different  
477 neuromodulatory conditions.

#### 478 **Materials and Methods**

479 Adult male crabs (*Cancer borealis*) were acquired from local distributors and  
480 maintained in aquaria filled with chilled (10-13°C) artificial sea water until use. Crabs  
481 were prepared for dissection by placing them on ice for 30 minutes. The dissection was  
482 performed using standard protocols as previously described (Tohidi and Nadim, 2009;  
483 Tseng and Nadim, 2010). The STNS, including the four ganglia (esophageal ganglion,  
484 two commissural ganglia, and the STG) and their connecting nerves, and the motor

485 nerves arising from the STG, were dissected from the stomach and pinned into a  
486 Sylgard (Dow-Corning) lined Petri dish filled with chilled saline. The STG was  
487 desheathed, exposing the somata of the neurons for intracellular impalement.  
488 Preparations were superfused with chilled (10-13°C) physiological *Cancer* saline  
489 containing: 11 mM KCl, 440 mM NaCl, 13 mM CaCl<sub>2</sub> · 2H<sub>2</sub>O, 26 mM MgCl<sub>2</sub> · 6H<sub>2</sub>O,  
490 11.2 mM Trizma base, 5.1 mM maleic acid with a pH of 7.4.

491 Extracellular recordings were obtained from identified motor nerves using  
492 stainless steel electrodes, amplified using a differential AC amplifier (A-M Systems,  
493 model 1700). One lead was placed inside a petroleum jelly well created to electrically  
494 isolate a small section of the nerve, the other right outside of it. For intracellular  
495 recordings, glass microelectrodes were prepared using the Flaming-Brown  
496 micropipette puller (P97; Sutter Instruments) and filled with 0.6 M K<sub>2</sub>SO<sub>4</sub> and 20 mM  
497 KCl. Microelectrodes used for membrane potential recordings had resistances of 25-  
498 30MΩ; those used for current injections had resistances of 15-22 MΩ. Intracellular  
499 recordings were performed using Axoclamp 2B and 900A amplifiers (Molecular  
500 Devices). Data were acquired using pClamp 10 software (Molecular Devices) and the  
501 Netsuite software (Gotham Scientific), sampled at 4-5 kHz and saved on a PC using a  
502 Digidata 1332A (Molecular Devices) or a PCI-6070-E data acquisition board (National  
503 Instruments).

504 Individual pyloric neurons were impaled and identified via their membrane  
505 potential waveforms, correspondence of spike patterns with extracellular nerve  
506 recordings, and interactions with other neurons within the network (Weimann et al.,  
507 1991).

### 508 *Constructing realistic IPSC waveforms*

509 Inhibitory postsynaptic currents (IPSCs) were recorded from LP neurons during  
510 the ongoing rhythm using two-electrode voltage clamp and holding the LP neuron  
511 at -50mV, far from the IPSC reversal potential of ~ -80 mV (Fig. 3A). When the LP  
512 soma is voltage clamped at -50 mV, the axon (which is electrotonically distant from the  
513 soma) can still produce action potentials following the synaptic inhibition from the  
514 pacemaker neurons. The onset of the LP neuron action potentials (recorded in the  
515 current trace) was used to calculate the mean IPSC for each experiment averaging the  
516 IPSCs over 10-20 cycles. The IPSC waveforms were then extracted by normalizing  
517 both the amplitude and the duration of the mean IPSC.

518 *Driving the LP neuron with noise current*

519 In these experiments, the preparation was superfused in *Cancer* saline plus  
520  $10^{-5}$  M picrotoxin (PTX; Sigma Aldrich) for 30 minutes to block the synaptic currents to  
521 the LP neuron. The removal of synaptic inhibition onto LP neurons changed the  
522 activity of these neurons from bursting to tonic firing. Then, noise current, generated by  
523 the Ornstein-Uhlenbeck process (Lindner), was injected into the isolated LP neurons  
524 for 60 minutes using the Scope software (available at  
525 <http://stg.rutgers.edu/Resources.html>, developed in the Nadim laboratory). The baseline  
526 of the noise current was adjusted by adding DC current so that it can provide enough  
527 inhibition to produce silent periods alternating with bursts of action potentials.

528 *Driving the LP neuron with realistic or triangular IPSC waveforms in dynamic clamp*

529 The dynamic clamp current was injected using the Netclamp software (Netsuite,  
530 Gotham Scientific). The synaptically isolated ( $10^{-5}$  M PTX) LP neuron was driven with  
531 an artificial synaptic current in dynamic clamp. The synaptic current was given as

532 
$$I_{syn} = g_{syn} (V_{LP} - E_{syn})$$

533 where the synaptic conductance  $g_{syn}$  was a pre-determined waveform, repeated  
534 periodically with period  $P$ , and  $E_{syn}$  was the synaptic reversal potential set to  $-80$  mV  
535 (Zhao et al., 2011).

536 Two sets of dynamic clamp experiments were performed on different animals.  
537 In one set of experiments,  $g_{syn}$  was set to be a triangular waveform. We measured the  
538 effects of four different parameters in these triangle conductance injections (Fig. 1):  
539 peak phase ( $\Delta_{peak}$ ), duration ( $T_{act}$ ), period ( $P$  = time between onsets of dynamic clamp  
540 synaptic injections), and maximal conductance ( $g_{max}$ , the peak value of  $g_{syn}$ ). This  
541 allowed us to explore which combinations of the different parameters influences the LP  
542 phase. Five values for  $P$  were used: 500, 750, 1000, 1500, and 2000 ms, which cover  
543 the typical range of pyloric cycle periods. Three values of  $g_{max}$  were used: 0.1, 0.2 and  
544 0.4  $\mu$ S, consistent with previous measurements of synaptic conductance (Zhao et al.,  
545 2011; Tseng et al., 2014). The value of  $\Delta_{peak}$  was varied to be 0, 0.25, 0.5, 0.75 or 1. In  
546 the same experiment, all runs were done in two conditions: with  $T_{act}$  constant across  
547 different  $P$  values (C-Dur case with  $T_{act} = 300$  ms) or with  $T_{act}$  changing proportionally  
548 to  $P$  (C-DC case with duty cycle  $DC = T_{act} / P = 0.3$ ).

549 In the other set of experiments,  $g_{syn}$  was a realistic IPSC waveform, based on a  
550 pre-recorded IPSC in the LP neuron. In these experiments,  $P$  was varied to be 500,  
551 750, 1000, 1250, 1500, or 2000 ms by scaling the realistic waveform in the time  
552 direction. In these experiments,  $g_{max}$  was set to be 0.1, 0.2, 0.4, 0.6, or 0.8  $\mu$ S. The LP  
553 neuron burst onset delay ( $\Delta t$ ) was measured relative to the onset of the pacemaker  
554 component of the synaptic input (identified by the kink in the synaptic conductance  
555 waveform) in each cycle. The burst phase was calculated as  $\phi_{LP} = \Delta t / P$ . Phase  
556 constancy means that  $\Delta t$  changed proportionally to  $P$ . To measure the LP neuron  
557 phase with respect to the end of the pacemaker input, this reference used was the  
558 point on the synaptic conductance waveform marked by drawing a horizontal line from  
559 the kink that identified the onset of the pacemaker input.

#### 560 *Determining relationship between cycle period ( $P$ ), synaptic strength ( $g_{max}$ ) and LP* 561 *phase ( $\phi_{LP}$ ) using the realistic IPSC waveform*

562 We determined how well the mathematical model derived for constant input  
563 duty cycles (see Equation 8 below), matched the experimental data obtained with  
564 realistic IPSC waveforms. To this end, we fit the model to  $\phi_{LP}$  values measured for all  
565 values of  $g_{max}$  and  $P$ , using the standard fitting routine 'fit' in MATLAB (Mathworks).

#### 566 *Sensitivity of $\phi_{LP}$ to $g_{max}$ and $\Delta_{peak}$ across all $P$ values*

567 To explore how  $g_{max}$  and  $\Delta_{peak}$  might interact to influence  $\phi_{LP}$ , we first examined  
568 the sensitivity of  $\phi_{LP}$  to these two parameters, individually and in combination, for all  
569 values of  $P$  in our data. For each cycle period, we computed the mean phase across all  
570 of our experiments (N=9) and all values of  $g_{max}$  (0.1, 0.2 and 0.4  $\mu$ S) and we  
571 interpolated the  $\phi_{LP}$  for  $g_{max}$  (0.2 and 0.4) to obtain  $\phi_{LP}$  for 0.3 and  $\Delta_{peak}$  (0, 0.25, 0.5,  
572 0.75 or 1). This produced a 4 by 5 matrix of all of the values. For each data point in the  
573 matrix, we moved along eight different directions (increase both  $g_{max}$  and  $\Delta_{peak}$ , increase  
574  $g_{max}$ , increase  $\Delta_{peak}$ , decrease both  $g_{max}$  and  $\Delta_{peak}$ , decrease  $g_{max}$ , decrease  $\Delta_{peak}$ ,  
575 increase  $g_{max}$  and decrease  $\Delta_{peak}$ , and decrease  $g_{max}$  and increase  $\Delta_{peak}$ ) and calculated  
576 the change in phase per unit (normalized) in  $g_{max}$ ,  $\Delta_{peak}$ , or both.

#### 577 *A model of synaptic dynamics*

578 In the derivation of the model, the firing time of the LP neuron was assumed to  
579 be completely determined by its synaptic input. This synaptic conductance ( $g_{syn}$ ) was

580 assumed to rise and fall with distinct time constants. The following holds over one cycle  
581 period and therefore time is reset with period  $P$  ( $t \pmod{P}$ ):

$$582 \quad \frac{dg_{syn}}{dt} = \begin{cases} (g_{max} - g_{syn})\tau_r & t \pmod{P} < t_{peak} \\ -g_{syn} / \tau_s & t \pmod{P} \geq t_{peak} \end{cases} \quad (6)$$

583 where the time  $t_{peak}$ , corresponding to  $\Delta_{peak}$ , is  $t_{peak} = \Delta_{peak} T_{act}$ . We assumed that LP  
584 neuron remained inactive when  $g_{syn}$  was above a fixed threshold ( $g^*$ ) less than  $g_{max}$ .  
585 Because the synaptic input is periodic with period  $P$ , we solved for the minimum and  
586 maximum values of  $g_{syn}$  in each cycle. The minimum ( $g_{lo}$ ) occurred just before the onset  
587 ( $t = 0$ ) of AB/PD activity, whereas the maximum occurred at the peak synaptic phase  
588  $\Delta_{peak}$  for the C-Dur case. In the C-DC case,  $T_{act} = DC \cdot P$ , where  $DC$  is the duty cycle  
589 (fixed at 0.3 in our experiments).

590 To calculate  $g^*$ , we set the value  $t = 0$  so that  $g_{syn}(0) = g_{lo}$  (and, by periodicity,  
591  $g_{syn}(P) = g_{lo}$ ), and solved the first part of Equation (1) where  $g_{syn}$  increases until  $t = t_{peak}$ .  
592 This yielded

$$593 \quad g_{peak} = g_{syn}(t_{peak}) = g_{max} + (g_{lo} - g_{max})e^{-t_{peak}/\tau_r} \quad (7)$$

594 We then used the second part of Equation (1) to track the decay of  $g_{syn}$  for  $t_{peak} < t < P$ :

$$595 \quad g_{syn}(t) = g_{peak}e^{-(t-t_{peak})/\tau_s} \quad (8)$$

596 Using Equation (3), we calculated the time  $\Delta t$  at which the synaptic conductance  
597  $g_{syn}(\Delta t) = g^*$  as follows:

$$598 \quad g^* = g_{peak}e^{-(\Delta t - t_{peak})/\tau_s} \quad (9)$$

599 Solving Equation (4) for  $\Delta t$  yielded

$$600 \quad \Delta t = \tau_s \ln \frac{g(t_{peak})}{g^*} + t_{peak}.$$

601 Dividing this equation by  $P$  yielded  $\phi_{LP}$ :

$$602 \quad \phi_{LP} = F(P, g_{max}, \Delta_{peak}) = \frac{\tau_s}{P} \ln \frac{g_{peak}}{g^*} + \frac{t_{peak}}{P}, \quad (10)$$

603 where  $g_{peak}$  is given by Equation (2). This expression provides a description of the  
 604 dependence of  $\varphi_{LP}$  as a function of  $P$ ,  $g_{max}$  and  $\Delta_{peak}$ . To explore the role of the  
 605 parameters in this relationship, we made a simplifying assumption that the synaptic  
 606 conductance  $g_{syn}(t)$  rapidly reached its peak (i.e.,  $\tau_r$  was small), stayed at this value and  
 607 started to decay at  $t = t_{peak}$ . In this case  $g(t) = g_{max}$  on the interval  $(0, t_{peak})$  and the value  
 608 of  $g_{lo}$  is irrelevant. With this assumption, Equation (5) reduced to

$$609 \quad \varphi_{LP} = \frac{\tau_s}{P} \ln \frac{g_{max}}{g^*} + \frac{t_{peak}}{P}. \quad (11)$$

610 Substituting  $t_{peak} = \Delta_{peak} \cdot T_{act}$  in Equation (6), gave

$$611 \quad \varphi_{LP} = F(P, g_{max}, \Delta_{peak}) = \frac{\tau_s}{P} \ln \frac{g_{max}}{g^*} + \frac{\Delta_{peak} T_{act}}{P}, \quad (12)$$

612 which we used to describe the LP phase in the C-Dur case. To describe the C-DC  
 613 case, after substituting  $t_{peak} = \Delta_{peak} \cdot DC \cdot P$ , we obtained

$$614 \quad \varphi_{LP} = F(P, g_{max}, \Delta_{peak}) = \frac{\tau_s}{P} \ln \frac{g_{max}}{g^*} + \Delta_{peak} DC. \quad (13)$$

615 Note that these equations also describe the relationship between  $\varphi_{LP}$  with  $T_{act}$  (or  $DC$ , in  
 616 the C-DC case).

617 Equations (7) and (8) can be used to approximate a range of parameters over  
 618 which  $\varphi_{LP}$  is maintained at a constant value. To do so, we assumed a specific  
 619 parameter set, say  $(\hat{P}, \hat{g}_{max}, \hat{\Delta}_{peak})$ , satisfies

$$620 \quad F(\hat{P}, \hat{g}_{max}, \hat{\Delta}_{peak}) = \hat{\varphi}_{LP},$$

621 for some fixed phase value,  $\hat{\varphi}_{LP}$ . We could now ask whether there are nearby  
 622 parameters for which phase remains constant, i.e.,  $F$  remains equal to  $\hat{\varphi}_{LP}$ . The Implicit  
 623 Function Theorem (Krantz and Parks, 2012) guarantees that this is the case, provided  
 624 certain derivatives evaluated at  $(\hat{P}, \hat{g}_{max}, \hat{\Delta}_{peak})$  are non-zero, which turns out to be true  
 625 over a large range of parameters. Since the partial derivative with respect to  $\Delta_{peak}$  of  
 626  $F(P, g_{max}, \Delta_{peak})$  at this point is a non-zero constant equal to  $T_{act}/P$  (or  $DC$ ) in the C-Dur  
 627 (or C-DC) case, there is a function  $\Delta_{peak} = h(P, g_{max})$  such that

628 
$$F(P, g_{max}, h(P, g_{max})) = \hat{\phi}_{LP} \quad (14)$$

629 for values of  $P$  and  $g_{max}$  near  $(\hat{P}, \hat{g}_{max})$ . In other words, the Implicit Function Theorem  
 630 guarantees that small changes in  $P$  and  $g_{max}$  can be compensated for by an appropriate  
 631 choice of  $\Delta_{peak}$  in order to maintain a constant LP phase. A similar analysis can be  
 632 done by solving for  $g_{max}$  in terms of  $P$  and  $\Delta_{peak}$  or by solving for  $P$  in terms of  $g_{max}$  and  
 633  $\Delta_{peak}$ .

634 *Adding synaptic depression to the model of synaptic dynamics*

635 In a previous modeling study, we explored how the phase of a follower neuron  
 636 was affected when the inhibitory synapse from an oscillatory neuron to this follower  
 637 had short-term synaptic depression (Manor et al., 2003). In that study the role of the  
 638 parameter  $\Delta_{peak}$  was not considered. It is, however, straightforward to add synaptic  
 639 depression to **Equations (7) and (8)**.

640 An *ad hoc* model of synaptic depression can be made using a single variable  $s_d$   
 641 which will be a periodic function that denotes the extent of depression and takes on  
 642 values between 0 and 1 (Bose et al., 2004).  $s_d$  decays during the AB/PD burst (from  
 643 time 0 to  $T_{act}$ , indicating depression) and then recovers during the inter-burst interval  
 644 (from  $T_{act}$  to  $P$ , indicating recovery). Thus,  $s_d$  can be described by an equation of the  
 645 form:

646 
$$\frac{ds_d}{dt} = \begin{cases} -s_d / \tau_\beta & t \pmod{P} \leq T_{act} \\ (1 - s_d) / \tau_\alpha & T_{act} < t \pmod{P} < P \end{cases}$$

647 Using periodicity, it is straightforward to show that the maximum value of  $s_d$ , which  
 648 occurs at the start of the AB/PD burst, is given by:

649 
$$s_{max}(P) = \frac{1 - e^{-P(1-DC)/\tau_\alpha}}{1 - e^{-P(1-DC)/\tau_\alpha} e^{-DC \cdot P/\tau_\beta}}. \quad (15)$$

650 Note that  $s_{max}$  is a monotonically increasing function with values between 0 and 1. Its  
 651 value approaches 1 as  $P$  increases, indicating that the synapse becomes stronger. For  
 652 a complete derivation and description, see (Bose et al., 2004). The effect of synaptic  
 653 depression on synaptic strength can be obtained by setting

654 
$$g_{max} = \bar{g}_{max} \cdot s_{max}(P) \quad (16)$$



655 where  $s_{max}$  is given by [Equation \(10\)](#).

## 656 *Software, analysis and statistics*

657 Data were analyzed using MATLAB scripts to calculate the time of burst onset  
658 and the phase. Statistical analysis was performed using Sigmaplot 12.0 (Systat).  
659 Significance was evaluated with an  $\alpha$  value of 0.05, error bars and error values  
660 reported denote standard error of the mean (SEM).

## 661 **Acknowledgements**

662 We thank Drs. Horacio Rotstein and Eric Fortune for helping with the initial  
663 MATLAB scripts in the analysis. This study was supported by NIH MH060605 and NSF  
664 DMS1122291.

## 665 **Competing interests**

666 The authors declare no competing financial interests.

## 667 **References**

- 668 Bargmann CI (2012) Beyond the connectome: how neuromodulators shape neural  
669 circuits. *Bioessays* 34:458-465.
- 670 Belluscio MA, Mizuseki K, Schmidt R, Kempter R, Buzsaki G (2012) Cross-  
671 frequency phase-phase coupling between theta and gamma oscillations in  
672 the hippocampus. *J Neurosci* 32:423-435.
- 673 Bidaye SS, Bockemuhl T, Buschges A (2018) Six-legged walking in insects: how  
674 CPGs, peripheral feedback, and descending signals generate coordinated  
675 and adaptive motor rhythms. *J Neurophysiol* 119:459-475.
- 676 Bose A, Manor Y, Nadim F (2004) The activity phase of postsynaptic neurons in a  
677 simplified rhythmic network. *J Comput Neurosci* 17:245-261.
- 678 Brezina V (2010) Beyond the wiring diagram: signalling through complex  
679 neuromodulator networks. *Philos Trans R Soc Lond B Biol Sci* 365:2363-  
680 2374.
- 681 Bucher D, Marder E (2013) SnapShot: Neuromodulation. *Cell* 155:482-482 e481.
- 682 Bucher D, Prinz AA, Marder E (2005) Animal-to-animal variability in motor pattern  
683 production in adults and during growth. *J Neurosci* 25:1611-1619.
- 684 Bucher D, Haspel G, Golowasch J, Nadim F (2015) Central Pattern Generators. *eLS*.
- 685 Buzsaki G, Wang XJ (2012) Mechanisms of gamma oscillations. *Annu Rev Neurosci*  
686 35:203-225.
- 687 Buzsaki G, Tingley D (2018) Space and Time: The Hippocampus as a Sequence  
688 Generator. *Trends in cognitive sciences* 22:853-869.

- 689 Cohen AH, Ermentrout GB, Kiemel T, Kopell N, Sigvardt KA, Williams TL (1992)  
690 Modeling of Intersegmental Coordination in the Lamprey Central Pattern  
691 Generator for Locomotion. *Trends in Neurosciences* 15:434-438.
- 692 Daur N, Nadim F, Bucher D (2016) The complexity of small circuits: the  
693 stomatogastric nervous system. *Curr Opin Neurobiol* 41:1-7.
- 694 Dicaprio R, Jordan G, Hampton T (1997) Maintenance of motor pattern phase  
695 relationships in the ventilatory system of the crab. *J Exp Biol* 200:963-974.
- 696 Eisen JS, Marder E (1984) A mechanism for production of phase shifts in a pattern  
697 generator. *J Neurophysiol* 51:1375-1393.
- 698 Fortune ES, Rose GJ (2001) Short-term synaptic plasticity as a temporal filter.  
699 *Trends Neurosci* 24:381-385.
- 700 Goaillard JM, Taylor AL, Schulz DJ, Marder E (2009) Functional consequences of  
701 animal-to-animal variation in circuit parameters. *Nat Neurosci* 12:1424-  
702 1430.
- 703 Grande LA, Spain WJ (2005) Synaptic depression as a timing device. *Physiology*  
704 (Bethesda, Md) 20:201-210.
- 705 Greenberg I, Manor Y (2005) Synaptic depression in conjunction with A-current  
706 channels promote phase constancy in a rhythmic network. *J Neurophysiol*  
707 93:656-677.
- 708 Grillner S (2006) Biological pattern generation: the cellular and computational  
709 logic of networks in motion. *Neuron* 52:751-766.
- 710 Grillner S, El Manira A (2015) The intrinsic operation of the networks that make us  
711 locomote. *Curr Opin Neurobiol* 31:244-249.
- 712 Hajos N, Palhalmi J, Mann EO, Nemeth B, Paulsen O, Freund TF (2004) Spike timing  
713 of distinct types of GABAergic interneuron during hippocampal gamma  
714 oscillations in vitro. *J Neurosci* 24:9127-9137.
- 715 Harris-Warrick RM (2011) Neuromodulation and flexibility in Central Pattern  
716 Generator networks. *Curr Opin Neurobiol* 21:685-692.
- 717 Harris-Warrick RM, Coniglio LM, Levini RM, Gueron S, Guckenheimer J (1995a)  
718 Dopamine modulation of two subthreshold currents produces phase shifts  
719 in activity of an identified motoneuron. *J Neurophysiol* 74:1404-1420.
- 720 Harris-Warrick RM, Coniglio LM, Barazangi N, Guckenheimer J, Gueron S (1995b)  
721 Dopamine modulation of transient potassium current evokes phase shifts in  
722 a central pattern generator network. *J Neurosci* 15:342-358.
- 723 Hasenstaub A, Shu Y, Haider B, Kraushaar U, Duque A, McCormick DA (2005)  
724 Inhibitory postsynaptic potentials carry synchronized frequency  
725 information in active cortical networks. *Neuron* 47:423-435.
- 726 Hasselmo ME, Bodelon C, Wyble BP (2002) A proposed function for hippocampal  
727 theta rhythm: separate phases of encoding and retrieval enhance reversal  
728 of prior learning. *Neural Comput* 14:793-817.
- 729 Hooper SL (1997a) Phase maintenance in the pyloric pattern of the lobster  
730 (*Panulirus interruptus*) stomatogastric ganglion. *J Comput Neurosci* 4:191-  
731 205.
- 732 Hooper SL (1997b) The pyloric pattern of the lobster (*Panulirus interruptus*)  
733 stomatogastric ganglion comprises two phase-maintaining subsets. *J*  
734 *Comput Neurosci* 4:207-219.

- 735 Hooper SL (1998) Transduction of temporal patterns by single neurons. *Nat*  
736 *Neurosci* 1:720-726.
- 737 Hooper SL, Buchman E, Weaver AL, Thuma JB, Hobbs KH (2009) Slow  
738 conductances could underlie intrinsic phase-maintaining properties of  
739 isolated lobster (*Panulirus interruptus*) pyloric neurons. *J Neurosci*  
740 29:1834-1845.
- 741 Jordan LM, Slawinska U (2011) Chapter 12--modulation of rhythmic movement:  
742 control of coordination. *Prog Brain Res* 188:181-195.
- 743 Katz PS (2016) Evolution of central pattern generators and rhythmic behaviours.  
744 *Philos Trans R Soc Lond B Biol Sci* 371:20150057.
- 745 Kayser C, Montemurro MA, Logothetis NK, Panzeri S (2009) Spike-phase coding  
746 boosts and stabilizes information carried by spatial and temporal spike  
747 patterns. *Neuron* 61:597-608.
- 748 Kiehn O (2016) Decoding the organization of spinal circuits that control  
749 locomotion. *Nat Rev Neurosci* 17:224-238.
- 750 Kloppenburg P, Levini RM, Harris-Warrick RM (1999) Dopamine modulates two  
751 potassium currents and inhibits the intrinsic firing properties of an  
752 identified motor neuron in a central pattern generator network. *J*  
753 *Neurophysiol* 81:29-38.
- 754 Kopell N, Whittington MA, Kramer MA (2011) Neuronal assembly dynamics in the  
755 beta1 frequency range permits short-term memory. *Proc Natl Acad Sci U S*  
756 *A* 108:3779-3784.
- 757 Krantz SG, Parks HR (2012) The implicit function theorem: history, theory, and  
758 applications: Springer Science & Business Media.
- 759 Le Gal JP, Dubuc R, Smarandache-Wellmann C (2017) Coordination of Rhythmic  
760 Movements. In: *Neurobiology of Motor Control: Fundamental Concepts and*  
761 *New Directions* (Hooper SL, Buschges A, eds). Hoboken, New Jersey: Wiley-  
762 Blackwell.
- 763 Lindner B A brief introduction to some simple stochastic processes. *Stochastic*  
764 *Methods in Neuroscience* 1.
- 765 Luther JA, Robie AA, Yarotsky J, Reina C, Marder E, Golowasch J (2003) Episodic  
766 bouts of activity accompany recovery of rhythmic output by a  
767 neuromodulator- and activity-deprived adult neural network. *J*  
768 *Neurophysiol* 90:2720-2730.
- 769 Ma C, LaMotte RH (2007) Multiple sites for generation of ectopic spontaneous  
770 activity in neurons of the chronically compressed dorsal root ganglion. *J*  
771 *Neurosci* 27:14059-14068.
- 772 Mamiya A, Nadim F (2004) Dynamic interaction of oscillatory neurons coupled  
773 with reciprocally inhibitory synapses acts to stabilize the rhythm period. *J*  
774 *Neurosci* 24:5140-5150.
- 775 Mamiya A, Manor Y, Nadim F (2003) Short-term dynamics of a mixed chemical and  
776 electrical synapse in a rhythmic network. *J Neurosci* 23:9557-9564.
- 777 Manor Y, Nadim F, Abbott LF, Marder E (1997) Temporal dynamics of graded  
778 synaptic transmission in the lobster stomatogastric ganglion. *J Neurosci*  
779 17:5610-5621.

- 780 Manor Y, Bose A, Booth V, Nadim F (2003) Contribution of synaptic depression to  
781 phase maintenance in a model rhythmic network. *J Neurophysiol* 90:3513-  
782 3528.
- 783 Marder E (2012) Neuromodulation of neuronal circuits: back to the future. *Neuron*  
784 76:1-11.
- 785 Marder E, Bucher D (2001) Central pattern generators and the control of rhythmic  
786 movements. *Curr Biol* 11:R986-996.
- 787 Marder E, Goaillard JM (2006) Variability, compensation and homeostasis in  
788 neuron and network function. *Nat Rev Neurosci* 7:563-574.
- 789 Marder E, Bucher D (2007) Understanding circuit dynamics using the  
790 stomatogastric nervous system of lobsters and crabs. *Annu Rev Physiol*  
791 69:291-316.
- 792 Marder E, O'Leary T, Shruti S (2014) Neuromodulation of circuits with variable  
793 parameters: single neurons and small circuits reveal principles of state-  
794 dependent and robust neuromodulation. *Annu Rev Neurosci* 37:329-346.
- 795 Marder E, Bucher D, Schulz DJ, Taylor AL (2005) Invertebrate central pattern  
796 generation moves along. *Curr Biol* 15:R685-699.
- 797 Markram H, Wang Y, Tsodyks M (1998) Differential signaling via the same axon of  
798 neocortical pyramidal neurons. *Proc Natl Acad Sci U S A* 95:5323-5328.
- 799 Masino MA, Fetcho JR (2005) Fictive swimming motor patterns in wild type and  
800 mutant larval zebrafish. *J Neurophysiol* 93:3177-3188.
- 801 McLelland D, Paulsen O (2009) Neuronal oscillations and the rate-to-phase  
802 transform: mechanism, model and mutual information. *J Physiol* 587:769-  
803 785.
- 804 Mouser C, Nadim F, Bose A (2008) Maintaining phase of the crustacean tri-phasic  
805 pyloric rhythm. *J Math Biol* 57:161-181.
- 806 Mullins OJ, Hackett JT, Buchanan JT, Friesen WO (2011) Neuronal control of  
807 swimming behavior: comparison of vertebrate and invertebrate model  
808 systems. *Prog Neurobiol* 93:244-269.
- 809 Nadim F, Manor Y (2000) The role of short-term synaptic dynamics in motor  
810 control. *Curr Opin Neurobiol* 10:683-690.
- 811 Nadim F, Bucher D (2014) Neuromodulation of neurons and synapses. *Curr Opin*  
812 *Neurobiol* 29:48-56.
- 813 Nadim F, Booth V, Bose A, Manor Y (2003) Short-term synaptic dynamics promote  
814 phase maintenance in multi-phasic rhythms. *Neurocomputing* 52-4:79-87.
- 815 Oren I, Mann EO, Paulsen O, Hajos N (2006) Synaptic currents in anatomically  
816 identified CA3 neurons during hippocampal gamma oscillations in vitro. *J*  
817 *Neurosci* 26:9923-9934.
- 818 Panzeri S, Brunel N, Logothetis NK, Kayser C (2010) Sensory neural codes using  
819 multiplexed temporal scales. *Trends Neurosci* 33:111-120.
- 820 Pulver SR, Bayley TG, Taylor AL, Berni J, Bate M, Hedwig B (2015) Imaging fictive  
821 locomotor patterns in larval *Drosophila*. *J Neurophysiol* 114:2564-2577.
- 822 Skinner FK, Mulloney B (1998) Intersegmental coordination in invertebrates and  
823 vertebrates. *Curr Opin Neurobiol* 8:725-732.
- 824 Somogyi P, Klausberger T (2005) Defined types of cortical interneurone structure  
825 space and spike timing in the hippocampus. *J Physiol* 562:9-26.

- 826 Soofi W, Goeritz ML, Kispersky TJ, Prinz AA, Marder E, Stein W (2014) Phase  
827 maintenance in a rhythmic motor pattern during temperature changes in  
828 vivo. *J Neurophysiol* 111:2603-2613.
- 829 Stein PSG (2018) Central pattern generators in the turtle spinal cord: selection  
830 among the forms of motor behaviors. *J Neurophysiol* 119:422-440.
- 831 Stein W (2009) Modulation of stomatogastric rhythms. *J Comp Physiol A*  
832 *Neuroethol Sens Neural Behav Physiol* 195:989-1009.
- 833 Tang LS, Taylor AL, Rinberg A, Marder E (2012) Robustness of a rhythmic circuit to  
834 short- and long-term temperature changes. *J Neurosci* 32:10075-10085.
- 835 Tohidi V, Nadim F (2009) Membrane resonance in bursting pacemaker neurons of  
836 an oscillatory network is correlated with network frequency. *J Neurosci*  
837 29:6427-6435.
- 838 Tseng HA, Nadim F (2010) The membrane potential waveform of bursting  
839 pacemaker neurons is a predictor of their preferred frequency and the  
840 network cycle frequency. *J Neurosci* 30:10809-10819.
- 841 Tseng HA, Martinez D, Nadim F (2014) The frequency preference of neurons and  
842 synapses in a recurrent oscillatory network. *J Neurosci* 34:12933-12945.
- 843 Vidal-Gadea A, Topper S, Young L, Crisp A, Kressin L, Elbel E, Maples T, Brauner M,  
844 Erbguth K, Axelrod A, Gottschalk A, Siegel D, Pierce-Shimomura JT (2011)  
845 *Caenorhabditis elegans* selects distinct crawling and swimming gaits via  
846 dopamine and serotonin. *Proc Natl Acad Sci U S A* 108:17504-17509.
- 847 Wang XJ (2010) Neurophysiological and computational principles of cortical  
848 rhythms in cognition. *Physiol Rev* 90:1195-1268.
- 849 Weimann JM, Meyrand P, Marder E (1991) Neurons that form multiple pattern  
850 generators: identification and multiple activity patterns of gastric/pyloric  
851 neurons in the crab stomatogastric system. *J Neurophysiol* 65:111-122.
- 852 Wenning A, Hill AA, Calabrese RL (2004) Heartbeat control in leeches. II. Fictive  
853 motor pattern. *J Neurophysiol* 91:397-409.
- 854 Wenning A, Norris BJ, Gunay C, Kueh D, Calabrese RL (2018) Output variability  
855 across animals and levels in a motor system. *eLife* 7.
- 856 Zhang C, Guy RD, Mulloney B, Zhang Q, Lewis TJ (2014) Neural mechanism of  
857 optimal limb coordination in crustacean swimming. *Proc Natl Acad Sci U S A*  
858 111:13840-13845.
- 859 Zhao S, Sheibanie AF, Oh M, Rabbah P, Nadim F (2011) Peptide neuromodulation of  
860 synaptic dynamics in an oscillatory network. *J Neurosci* 31:13991-14004.
- 861



862 **Figures**

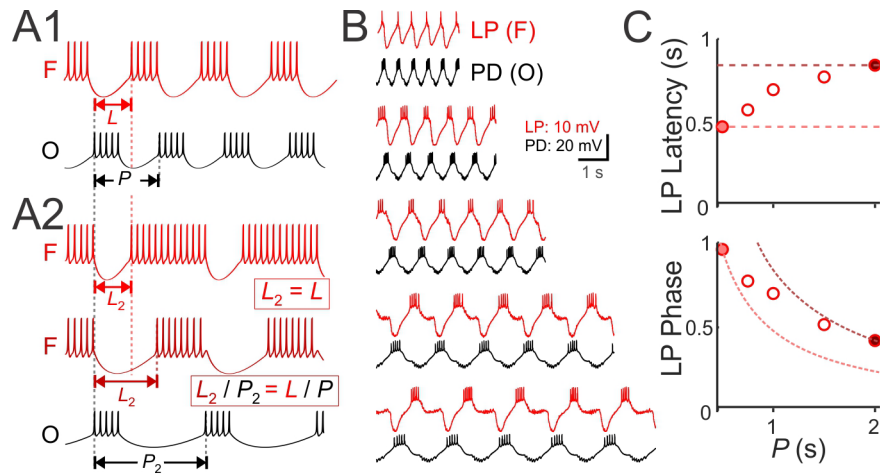

863

864 **Figure 1: Latency constancy and phase constancy as a function of period**

865 **A1.** Schematic diagram showing that a follower neuron (F) strongly inhibited by a  
 866 bursting oscillatory neuron (O) with period  $P$  can produce rebound bursts with the  
 867 same period at a latency  $L$ . **A2.** If the period of O changes to a new value ( $P_2$ ), the new  
 868 F burst latency ( $L_2$ ) typically falls between two extremes: it could stay constant (top  
 869 trace) or change proportionally to  $P_2$ , so that the burst phase ( $L / P$ ) remains constant  
 870 (middle trace). **B.** Example traces of the pyloric pacemaker PD neuron and the follower  
 871 LP neuron represent the O and F relationship in panel A. Here, the PD neuron is  
 872 voltage clamped and a pre-recorded waveform of the same neuron is used to force the  
 873 neuron to follow different cycle periods. **C.** A measurement of the LP neuron burst  
 874 onset phase with respect to the onset of the PD neuron burst shows that it falls  
 875 between the two limits of constant latency and constant phase. Dotted curves  
 876 represent constant latency matched to the latencies at the two extreme  $P$  values.

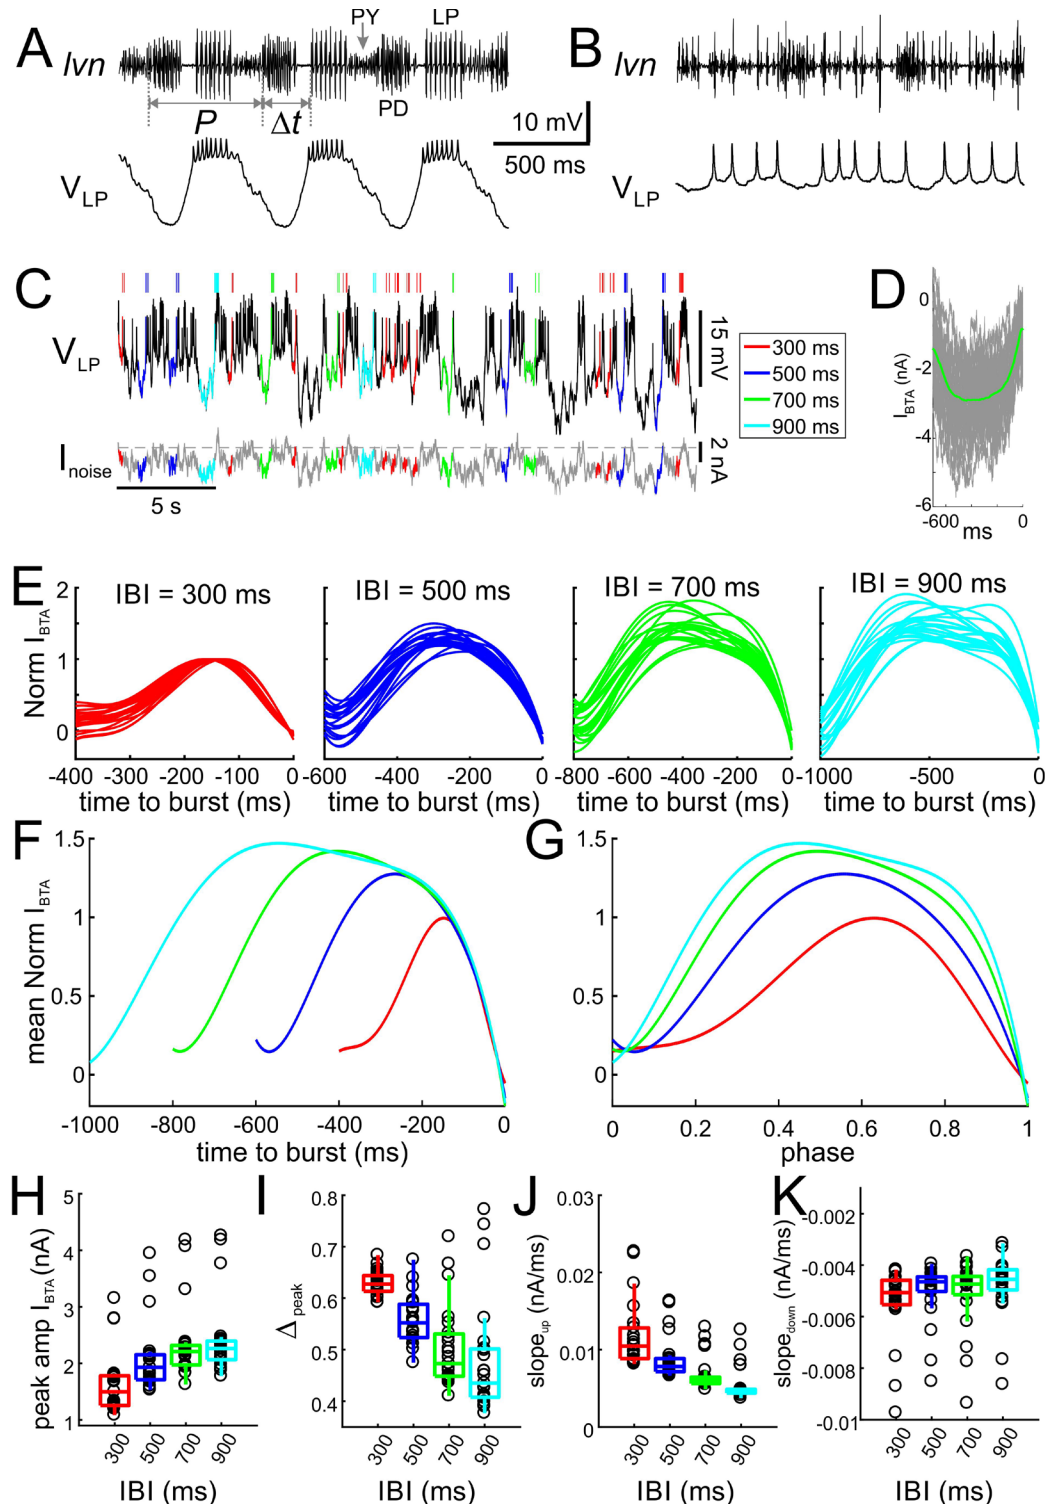

877

878

*Figure 2: Inputs to the LP neuron influence burst time, spike number and interval*

879

**A.** Simultaneous intracellular recording of the LP neuron and extracellular recording of

880

the lateral ventricular nerve (*I<sub>vn</sub>*), containing the axons of the LP, PD and PY neurons

881

(arrows). Period ( $P$ ) and the burst onset time ( $\Delta t$ ) of the LP neuron are defined in



882 reference to the pacemaker group (PD) burst. **B.** Blocking the synaptic inputs (10  $\mu$ M  
883 picrotoxin) to the LP neuron disrupts its bursting oscillations. **C.** The synaptically  
884 isolated LP neuron was driven with a noise current input ( $I_{noise}$ ) for 60 minutes. In  
885 response, the LP neuron produced an irregular pattern of bursting. Specific inter-burst  
886 intervals ( $IBIs$ ) were tagged and used for burst-triggered averaging. **D.** Example of  
887 burst-trigger-averaged input current ( $I_{BTA}$ , green). Individual traces are shown in grey.  
888 **E.** For each  $IBI$  (300, 500, 700, 900 ms),  $I_{BTA}$  was calculated and normalized to the  
889 amplitude of  $I_{BTA}$  for  $IBI=300$  ms. Different traces in each panel show the  $I_{BTA}$  of  
890 different preparations. **F.** The mean (across preparations) of the normalized  $I_{BTA}$ s  
891 shown in panel E. **G.** Traces in panel F normalized by  $IBI$ . **H-K.** Four parameters define  
892 the shape of the  $I_{BTA}$ : peak amplitude  $I_{amp}$  (**H**), peak phase  $\Delta_{peak}$  (**I**), slope<sub>up</sub> (**J**) and  
893 slope<sub>down</sub> (**K**) across preparations.  $IBI$  had a significant effect on amplitude  $I_{amp}$   
894 ( $p<0.001$ ), peak phase  $\Delta_{peak}$  ( $p<0.001$ ), slope<sub>up</sub> ( $p<0.001$ ) and slope<sub>down</sub> ( $p=0.002$ ).

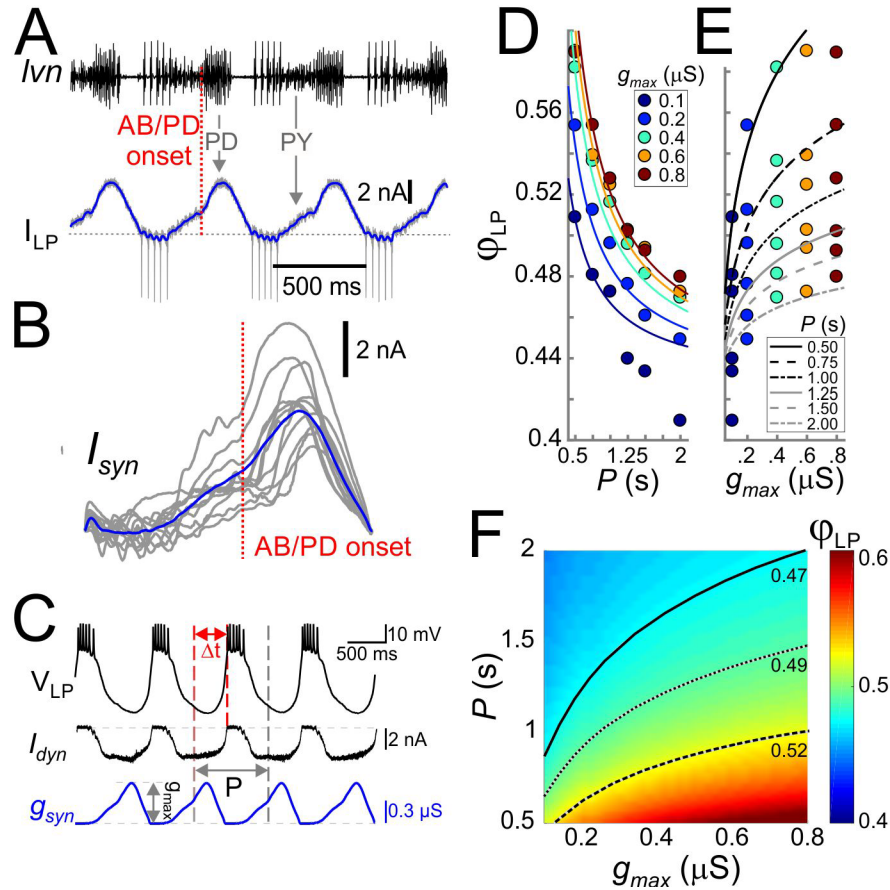

895

896 *Figure 3: Cycle period and synaptic strength affect the phase of LP burst onset in*  
 897 *opposite directions.*

898 **A.** The synaptic input to the LP neuron was measured by voltage clamping it at a  
 899 holding potential of -50mV during ongoing oscillations. The onset of the pacemaker  
 900 (AB/PD) activity is seen as a kink in the synaptic current ( $I_{LP}$ , blue). **B.** Synaptic input  
 901 averaged across cycles from 9 different LP neurons. The blue trace shows the  
 902 average. **C.** An example of the LP neuron driven by the realistic synaptic waveform in  
 903 dynamic clamp. The burst onset time ( $Dt$ ) was measured relative to the AB/PD onset  
 904 and used to measure the LP phase ( $\phi_{LP}$ ).  $g_{max}$  denotes the conductance amplitude. **D.**  
 905 Mean  $\phi_{LP}$  ( $N=9$  preparations) shown as a function of  $P$  and fit with the function given by  
 906 Equation (8) (fit values  $\tau_s = 26.0$  ms,  $g^* = 0.021$   $\mu\text{S}$  and  $\Delta_{peak} \cdot DC = 0.43$ ). **E.** Mean  $\phi_{LP}$   
 907 plotted against  $g_{max}$  also shown with the fit to Equation (8). **F.** Heat map, obtained from  
 908 fitting Equation (8) to the data in panels D and E, shows  $\phi_{LP}$  as a function of both  $g_{max}$   
 909 and  $P$ . Black curves show the level sets of phase constancy for three values of  $\phi_{LP}$   
 910 (0.47, 0.49, and 0.52).

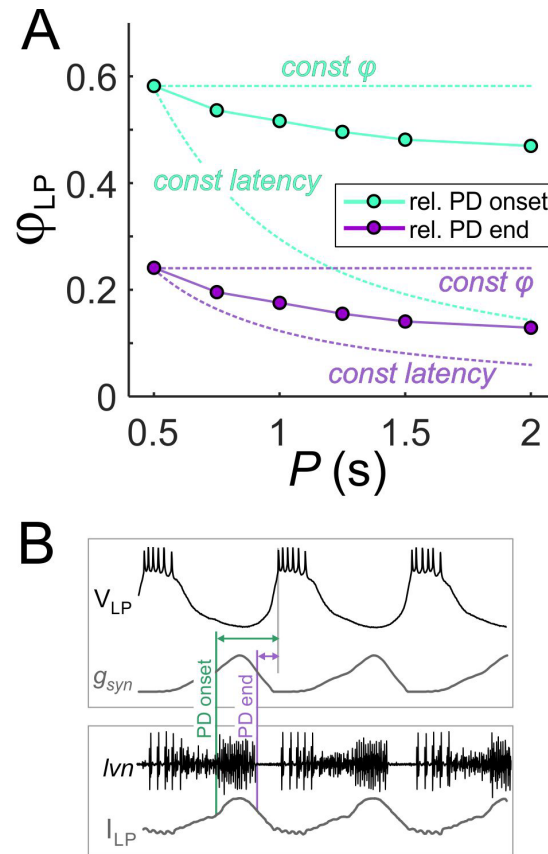

911

912 *Figure 4: The constant duty cycle of synaptic conductance is a major factor in phase*  
 913 *maintenance.*

914 **A.** The change in  $\phi_{LP}$  values with  $P$  are compared with the constant phase (solid curve)  
 915 and constant duration (dashed curve) extremes. Lime traces show the usual values of  
 916  $\phi_{LP}$ , calculated from the LP burst onset latency with respect to the onset of the PD  
 917 burst. Lavender traces show  $\phi_{LP}$  calculated from the LP burst onset latency with  
 918 respect to the end of the PD burst. Data shown are the same as in Fig. 3D for  $g_{max}=0.4$   
 919  $\mu\text{S}$ . **B.** Schematic diagram shows the latency of LP burst onset measured with respect  
 920 to the (estimated) onset and end of the PD burst in the dynamic clamp experiments  
 921 (see Methods). Bottom panel shows the synaptic current waveform measured in the  
 922 voltage-clamped LP neuron during ongoing pyloric activity. Top panel shows the  
 923 dynamic clamp injection of the synaptic conductance waveform into a synaptically-  
 924 isolated LP neuron. The current waveform of the bottom panel is aligned to the  
 925 conductance waveform of the top panel for the comparison used in determining the PD  
 926 burst onset and end in the top panel.

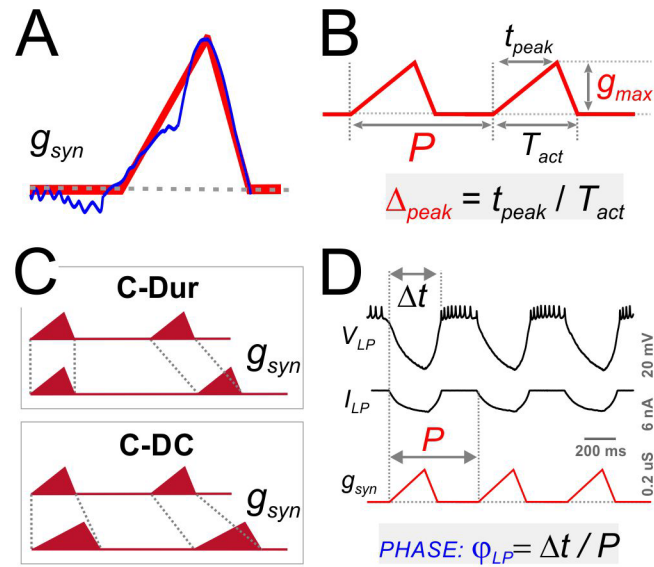

927

928 *Figure 5: Four parameters describing synaptic shape were varied in the experimental*  
 929 *paradigm.*

930 **A.** A triangle shaped conductance was used to mimic the synaptic input to the LP  
 931 neuron. **B.** The triangular waveform can be described by period ( $P$ ), duration ( $T_{act}$ ),  
 932 peak time ( $t_{peak}$ ) and amplitude ( $g_{max}$ ). **C.** In dynamic clamp runs, the synapse duration  
 933  $T_{act}$  was kept constant at 300 ms (C-Dur) or maintained at a constant duty cycle ( $T_{act}$   
 934  $/P$ ) of 0.3 (C-DC) across all values of  $P$ . **D.** Intracellular voltage recording of the  
 935 synaptically isolated LP neuron during a dynamic clamp stimulation run using the  
 936 triangle conductance. The burst onset time ( $\Delta t$ , calculated in reference to the synaptic  
 937 conductance onset) was used to calculate the activity phase ( $\phi_{LP} = \Delta t/P$ ).

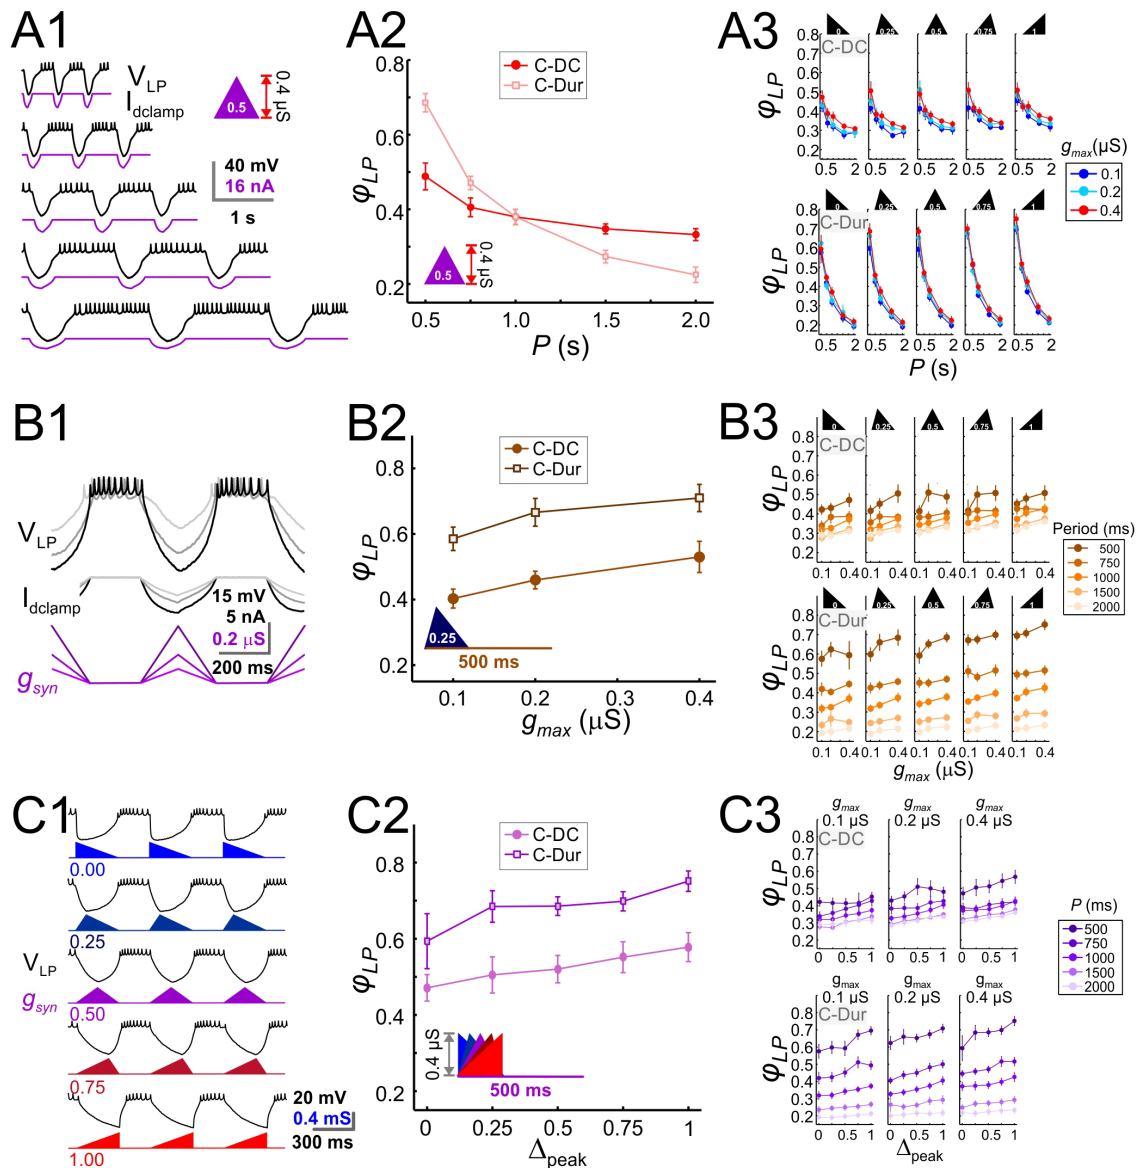

938

939

**Figure 6: The LP burst onset phase decreases as a function of  $P$ , but increases as a function of  $g_{max}$  and  $\Delta_{peak}$ .**

940

941 Periodic injection of an inhibitory triangular waveform conductance into the isolated LP

942 neuron produced bursting activity from which  $\phi_{LP}$  was calculated. The parameters  $g_{max}$ ,

943  $\Delta_{peak}$  and  $P$  were varied across runs for both C-Dur and C-DC cases. **A.**  $\phi_{LP}$  decreases

944 as a function of  $P$ . **A1.** Intracellular recording of an LP neuron showing a C-DC

945 conductance input across five periods. **A2.**  $\phi_{LP}$  for the example shown in A1 plotted as

946 a function of  $P$  (for  $g_{max} = 0.4 \mu\text{S}$ ,  $\Delta_{peak} = 0.5$ ) for both C-Dur and C-DC cases.  $\phi_{LP}$

947 decreases rapidly with  $P$  and the drop is larger for the C-Dur case. **A3.**  $\phi_{LP}$  decreased

948 with  $P$  in both the C-DC case (Three-Way RM ANOVA,  $p < 0.001$ ,  $F = 100.7$ ) and the C-

949 Dur case (Three-Way RM ANOVA,  $p < 0.001$ ,  $F = 466.4$ ) and all values of  $\Delta_{peak}$ . The

950 range of  $\varphi_{LP}$  drop was greater for the C-Dur case compared to the C-DC case. **B.**  $\varphi_{LP}$   
 951 increases as a function of  $g_{max}$ . **B1.** Intracellular recording of an LP neuron showing the  
 952 conductance input across three values of  $g_{max}$ . **B2.**  $\varphi_{LP}$  for the example shown in B1  
 953 plotted as a function of  $P$  (for  $P = 500$  ms,  $\Delta_{peak} = 0.25$ ) shows a small increase for both  
 954 C-Dur and C-DC cases. **B3.**  $\varphi_{LP}$  increased with  $g_{max}$  in almost all trials for both C-DC  
 955 and C-Dur cases and all values of  $\Delta_{peak}$ . **C.**  $\varphi_{LP}$  increases as a function of  $\Delta_{peak}$ . **C1.**  
 956 Intracellular recording of the LP neuron showing the conductance input for five values  
 957 of  $\Delta_{peak}$ . **C2.**  $\varphi_{LP}$  for the example neuron in C1 plotted as a function of  $\Delta_{peak}$  (for  $P = 500$   
 958 ms,  $g_{max} = 0.4$   $\mu$ S) for both C-DC and C-Dur cases. **C3.**  $\varphi_{LP}$  increased with  $\Delta_{peak}$  for  
 959 both C-DC and C-Dur cases and all values of  $g_{max}$ .

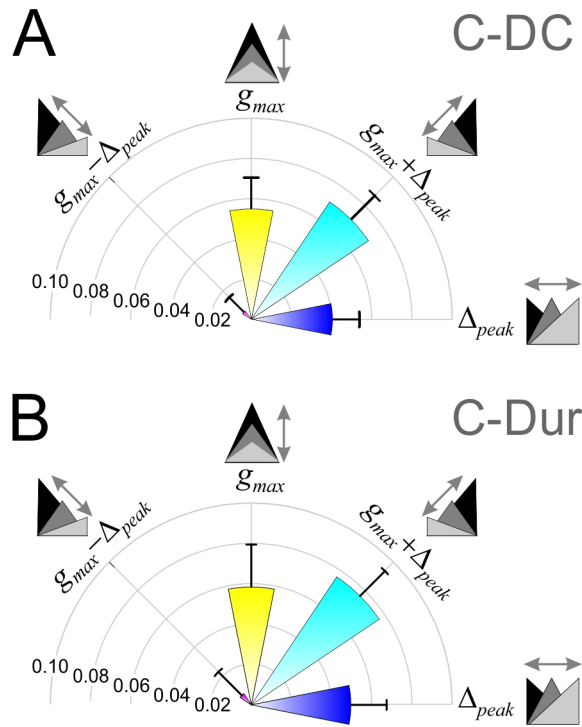

960

961 *Figure 7: Sensitivity analysis shows that  $\varphi_{LP}$  increases more effectively if  $g_{max}$  and  $\Delta_{peak}$*   
 962 *increase together.*

963 **A.** The sensitivity  $\varphi_{LP}$  to local changes in  $g_{max}$  and  $\Delta_{peak}$  was averaged across all values  
 964 of  $P$  for the C-DC case. The sensitivity was largest if both parameters were increased  
 965 together ( $g_{max} + \Delta_{peak}$ ) and smallest if they were varied in opposite directions ( $g_{max} -$   
 966  $\Delta_{peak}$ ; One-Way RM-ANOVA,  $p < 0.001$ ,  $F = 3.330$ ). **B.** The same sensitivity analysis in  
 967 the C-Dur case shows similar results (One-Way RM-ANOVA,  $p < 0.001$ ,  $F = 2.892$ ).



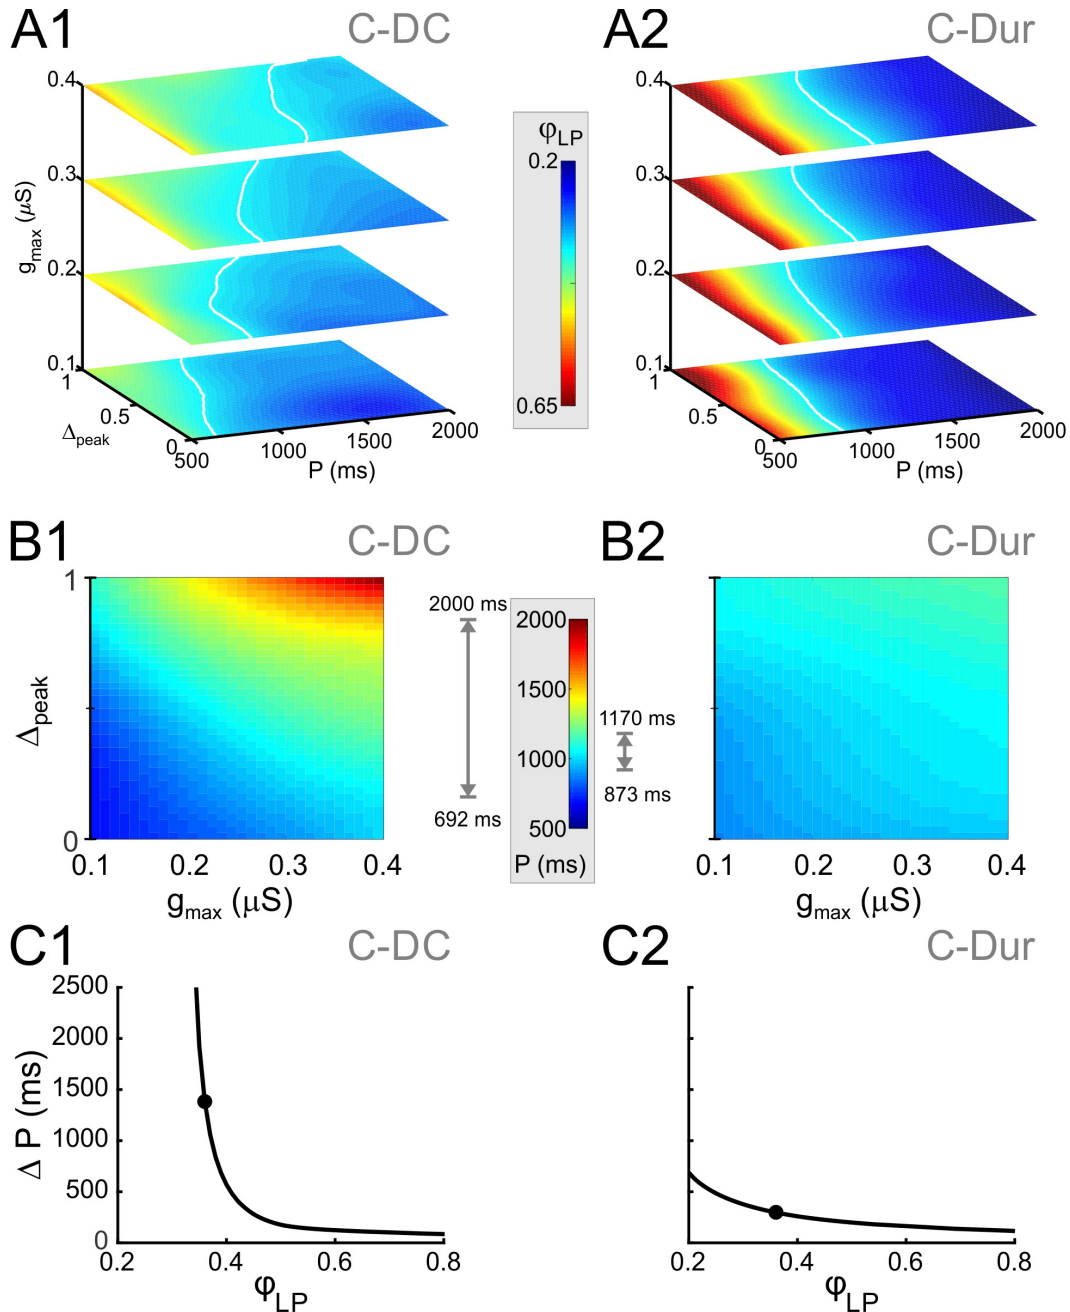

968

969

*Figure 8: Simultaneous increase of both  $\Delta_{peak}$  and  $g_{max}$  across their range of values can produce phase maintenance across a large  $P$  range in the C-DC case and a much smaller  $P$  range in the C-Dur case*

970

971

**A.** Heat map plots of the function  $\Phi$ , plotted for the range of values of  $P$  and  $\Delta_{peak}$  and 4 values of  $g_{max}$  for the C-DC (**A1**) and C-Dur (**A2**) cases. The white curves show the level set of  $\varphi_{LP} = 0.34$ , shown as an example of phase constancy. The color maps are interpolated from sampled data (see Methods;  $N=9$ ) **B.** Heat map for the level sets  $\varphi_{LP} = 0.34$  for the C-DC (**B1**) and C-Dur (**B2**) cases. Range of colors in each panel indicate

976



977 the range of  $P$  values for which  $\varphi_{LP}$  could remain constant at 0.34 for each case, as  
978 indicated by the grey arrows on the side of the heatmap color legend. **C.** The range  
979 ( $\Delta P$ ) of  $P$  values for which  $\varphi_{LP}$  could remain constant at any value between 0.2 and 0.8  
980 for the C-DC (**C1**) and C-Dur cases (**C2**). Filled circles show the values shown in panel  
981 B. The LP neuron cannot achieve  $\varphi_{LP}$  values below 0.3 in the C-DC case. For  $\varphi_{LP}$   
982 values between 0.3 and  $\sim 0.65$ , the range was larger in C-DC case.

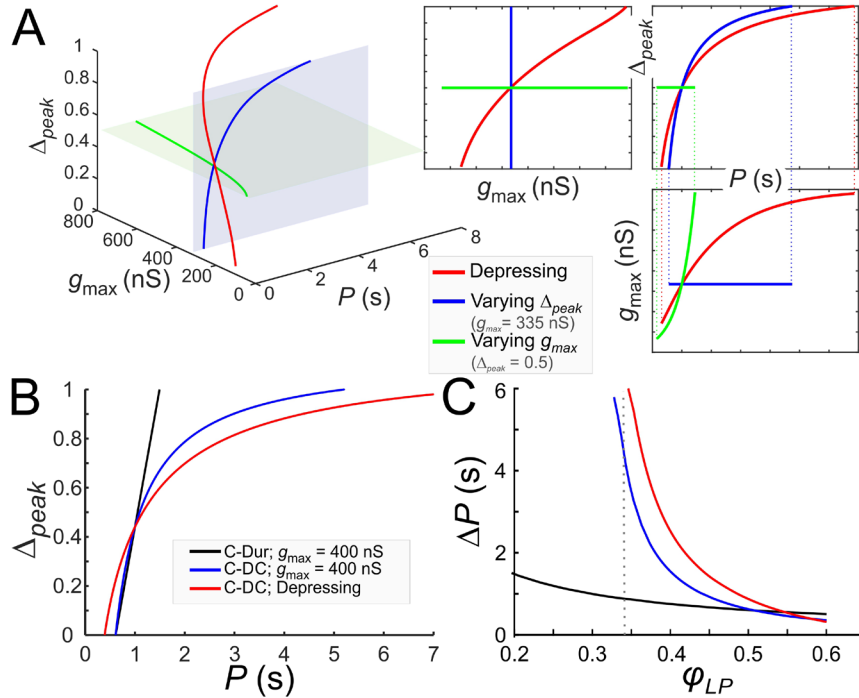

983

984 **Figure 9: Model prediction of the range of phase constancy.**

985 **A.** For the C-DC case, a constant phase of  $\phi_{LP} = 0.34$  can be maintained across a  
986 range of cycle periods  $P$  when  $g_{max}$  is constant (at 335 nS; blue plane) and  $\Delta_{peak}$  varies  
987 from 0 to 1 according to Equation (13) (blue), or when  $\Delta_{peak}$  is fixed (at 0.5; green  
988 plane) and  $g_{max}$  varies from 200 to 800 nS according to Equation (12). Alternatively,  
989  $g_{max}$  and  $\Delta_{peak}$  can covary to maintain phase, as in a depressing synapse, where  $g_{max}$   
990 varies with  $P$  according to Equation (11), and  $\Delta_{peak}$  is calculated for each  $P$  and  $g_{max}$   
991 value according to Equation (13). As seen in the 2D coordinate-plane projections of the  
992 3D graph (right three graphs), the range of  $P$  values for which phase constancy is  
993 achieved is largest when  $g_{max}$  and  $\Delta_{peak}$  covary (dotted lines show limits of  $P$  for phase  
994 constancy). The depressing synapse conductance is chosen to be 335 nS at  $P = 1$  s.  
995 **B, C.** A comparison between the C-DC and C-Dur cases shows that in the latter case a  
996 constant phase of  $\phi_{LP}$  can be maintained across a larger range of  $P$  values when  $\Delta_{peak}$   
997 increases with  $P$  (and  $g_{max}$  is fixed at 400 nS) according to Equation (13). The  
998 relationship of  $\Delta_{peak}$  and  $P$  is shown in **B** for  $\phi_{LP} = 0.34$ . **C** shows the range of  $P$  values  
999 ( $\Delta P$ ) of cycle periods for which phase remains constant at  $\phi_{LP}$ . If  $g_{max}$  also varies with  
1000  $P$ , as in a depressing synapse (red; Equation (11)), the range of  $P$  values for which  
1001 phase is constant is further increased. (Dotted line:  $\phi_{LP} = 0.34$ .)

1002 **Source Data Files**

1003 **Figure 2-1. File: *Figure2\_sourcedata.xlsx***

1004 This Excel file contains 4 sheets, including all measured attributes of the burst-

1005 triggered average current ( $I_{BTA}$ ) for different IBIs (N=23) as shown in **Fig. 2H-2K**.
