1 **Short-Term Synaptic Dynamics Control the Activity Phase of**  
2 **Neurons in an Oscillatory Network**

3

4 **Abbreviated Title:** Synaptic dynamics influence activity phase of oscillatory neurons

5

6 **Authors:** Diana Martinez<sup>1\*</sup>, Haroon Anwar<sup>1</sup>, Amitabha Bose<sup>2</sup>, Dirk Bucher<sup>1</sup>, Farzan  
7 Nadim<sup>1,2</sup>

8 1 Federated Department of Biological Sciences, New Jersey Institute of Technology  
9 and Rutgers University, Newark, NJ 07102.

10 2 Department of Mathematical Sciences, New Jersey Institute of Technology, Newark,  
11 NJ 07102.

12 \* Current Address: Department of Biomedical Sciences and Dalton Cardiovascular  
13 Research Center, University of Missouri, 134 Research Park Dr., Columbia, MO  
14 65211, USA

15

16 **Corresponding Author:** Farzan Nadim, New Jersey Institute of Technology,  
17 Department of Biological Sciences, 323 Martin Luther King Blvd, Newark, NJ 07102,  
18 Phone (973) 596-8453, Email: [farzan@njit.edu](mailto:farzan@njit.edu)

## 19 **Abstract**

20 In oscillatory systems, neuronal activity phase is often independent of network  
21 frequency. Such phase maintenance requires adjustment of synaptic input with  
22 network frequency, a relationship that we explored using the crab, *Cancer borealis*,  
23 pyloric network. The burst phase of pyloric neurons is relatively constant despite a >2-  
24 fold variation in network frequency. We used noise input to characterize how input  
25 shape influences burst delay of a pyloric neuron, and then used dynamic clamp to  
26 examine how burst phase depends on the period, amplitude, duration, and shape of  
27 rhythmic synaptic input. Phase constancy across a range of periods required a  
28 proportional increase of synaptic duration with period. However, phase maintenance  
29 was also promoted by an increase of amplitude and peak phase of synaptic input with  
30 period. Mathematical analysis shows how short-term synaptic plasticity can  
31 coordinately change amplitude and peak phase to maximize the range of periods over  
32 which phase constancy is achieved.

33 150/150

## 34 **Introduction**

35 Oscillatory neural activity is often organized into different phases across groups  
36 of neurons, both in brain rhythms associated with cognitive tasks or behavioral states  
37 (Hasselmo et al., 2002; Buzsaki and Wang, 2012; Buzsaki and Tingley, 2018), and in  
38 central pattern generating (CPG) circuits that drive rhythmic motor behaviors (Marder  
39 and Bucher, 2001; Marder et al., 2005; Grillner, 2006; Bucher et al., 2015; Katz, 2016;  
40 Stein, 2018). The functional significance of different phases in the latter is readily  
41 apparent, as they for example provide alternating flexion and extension of limb joints,  
42 and coordination of movements between joints, limbs, and segments (Krantz and  
43 Parks, 2012; Grillner and El Manira, 2015; Kiehn, 2016; Le Gal et al., 2017; Bidaye et  
44 al., 2018). A hallmark of many such patterns is that the relative timing of firing between  
45 neurons is well maintained over a range of rhythm frequencies (Dicaprio et al., 1997;  
46 Hooper, 1997b, a; Wenning et al., 2004; Marder et al., 2005; Grillner, 2006; Mullins et  
47 al., 2011; Le Gal et al., 2017). If the latency of firing across different groups of neurons  
48 changes proportionally to the rhythm period, phase (latency over period) is invariant, in  
49 some cases providing optimal limb coordination at all speeds (Zhang et al., 2014).

50           The ability of the system to coordinate phases with changes in period arises  
51 from central coordinating mechanisms between circuit elements, as it is present in  
52 isolated nervous system preparations, but the underlying cellular and circuit  
53 mechanisms are not well understood. For instance, constant phase lags between  
54 neighboring segments in the control of swimming in lamprey fish and crayfish can be  
55 explained mathematically on the basis of asymmetrically weakly coupled oscillators,  
56 but the role of intrinsic and synaptic dynamics within each segment is unknown (Cohen  
57 et al., 1992; Skinner and Mulloney, 1998; Grillner, 2006; Mullins et al., 2011; Zhang et  
58 al., 2014; Le Gal et al., 2017).

59           The pyloric circuit of the crustacean stomatogastric ganglion (STG) has inspired  
60 a series of experimental and theoretical studies of cellular and synaptic mechanisms  
61 underlying phase maintenance. The pyloric circuit generates a triphasic motor pattern  
62 with stable phase relationships over a wide range of periods (Eisen and Marder, 1984;  
63 Hooper, 1997b, a; Bucher et al., 2005; Goaillard et al., 2009; Tang et al., 2012; Soofi et  
64 al., 2014). Synapses in the pyloric circuit use graded as well as spike-mediated  
65 transmission (Graubard et al., 1980; Harris-Warrick and Johnson, 2010; Zhao et al.,  
66 2011; Rosenbaum and Marder, 2018). Follower neurons burst in rebound from  
67 inhibition from pacemaker neurons (Marder and Bucher, 2007; Daur et al., 2016), and  
68 post-inhibitory rebound delay scales with the period of hyperpolarizing currents  
69 (Hooper, 1998). Voltage-gated conductances slow enough for cumulative activation  
70 across cycles could promote such phase maintenance (Hooper et al., 2009). Similarly,  
71 short-term depression of graded inhibitory synapses is slow enough to accumulate  
72 over several pyloric cycles, meaning that effective synaptic strength increases with  
73 increasing cycle period (Manor et al., 1997; Nadim and Manor, 2000).

74           Theoretical studies have shown that short-term synaptic depression, by  
75 increasing inhibition strength with cycle period, should promote phase maintenance  
76 (Manor et al., 2003; Mouser et al., 2008), particularly in conjunction with inactivating (A-  
77 type) potassium currents (Bose et al., 2004; Greenberg and Manor, 2005), which  
78 control the rebound delay (Harris-Warrick et al., 1995b; Harris-Warrick et al., 1995a;  
79 Kloppenburg et al., 1999). These predictions remain experimentally untested.

80           Additionally, postsynaptic responses also depend on the actual trajectory of  
81 synaptic conductances, which are shaped by presynaptic voltage trajectories and  
82 short-term synaptic plasticity (Manor et al., 1997; Mamiya et al., 2003; Zhao et al.,

83 2011; Tseng et al., 2014). If amplitude, duration, and trajectory of synaptic  
84 conductance determine rebound delay, phase maintenance necessitates all three of  
85 these parameters to change with cycle period in coordination. We used the dynamic  
86 clamp technique to exhaustively explore the range of these parameters and  
87 understand how the coordinated changes in synaptic dynamics determines the phase  
88 of follower neurons in an oscillatory circuit. Our findings are consistent with a  
89 mathematical framework that accounts for the dependence of amplitude and peak  
90 phase of the synaptic conductance on cycle period.

## 91 **Results**

### 92 *Phase maintenance and latency maintenance*

93 The firing of neurons in oscillatory networks is shaped by a periodic synaptic  
94 input. The relative firing latency of such neurons is often measured relative to a defined  
95 reference time in each cycle of oscillation, and is used to determine the activity phase  
96 of the neuron (see, e.g., Belluscio et al., 2012). For example, in a simple network  
97 consisting of a bursting oscillatory neuron driving a follower neuron (Fig. 1A1), at a  
98 descriptive level, the latency ( $\Delta t$ ) of the follower neuron activity relative to the onset of  
99 the oscillator's burst onset may depend on the oscillation cycle period ( $P$ ). In response  
100 to a change in period (say, to  $P_2$ ), the follower neuron may keep constant latency ( $\Delta t_2$   
101 =  $\Delta t$ ), or constant phase, i.e., modify its latency proportionally to the change in period  
102 ( $\Delta t_2 / P_2 = \Delta t / P$ ; Fig. 1A2). However, in many oscillatory systems, for example the  
103 pyloric circuit (Hooper, 1997b, a), the relationship between  $L$  and  $P$  falls between these  
104 two extremes.

105 We demonstrated this point in the pyloric follower LP neuron using the following  
106 protocol. We voltage clamped one of the pacemaker PD neurons and drove this  
107 neuron with its own pre-recorded waveform, but applied at five different cycle periods  
108 ( $P$ ). This protocol entrained the pacemaker group at this period, which forced the  
109 follower LP neuron to obey the same period (Fig. 1B). We then measured the latency  
110 ( $\Delta t$ ) of the LP burst onset with respect to onset of the PD neuron burst. A plot of the LP  
111 latency  $\Delta t$  or phase ( $\Delta t / P$ ) for different cycle periods demonstrates the above-  
112 mentioned finding that the LP neuron activity falls between the two limits of constant  
113 phase and constant latency (Fig. 1C).

114

115 *The burst onset time of the LP neuron depends on the temporal dynamics of its input*

116 The LP neuron does not have intrinsic oscillatory properties, but oscillates due  
117 to the synaptic input it receives from the pacemaker anterior burster (AB) and pyloric  
118 dilator (PD) neurons, and the follower pyloric constrictor (PY) neurons (Fig. 2A). The  
119 burst onset phase of the LP neuron ( $\phi_{LP} = \Delta t / P$ ; Fig. 2A) is shaped by the interaction  
120 between synaptic inputs and the neuron's intrinsic dynamics that influence post-  
121 inhibitory rebound. We measured an overall burst onset phase of the LP neuron of  $\phi_{LP}$   
122  $= 0.34 \pm 0.03$  (N=9).

123 As a first-order quantification, we measured how inputs to the LP neuron  
124 interact with its intrinsic properties to determine the timing between its bursts, in the  
125 absence of network oscillations. To this end, we blocked the synaptic input from the  
126 pacemaker AB and follower PY neurons to the LP neuron (Fig. 2B) and drove the LP  
127 neuron with a noise current input (see Methods). In response to the noise input, the LP  
128 neuron produced an irregular pattern of spike times, which included a variety of  
129 bursting patterns with different spike numbers (Fig. 2C). We were interested in the  
130 characteristics of inputs producing different burst onset latencies. However, unlike a  
131 periodic input, noise input does not provide a well-defined reference point to measure  
132 the burst onset latency. We categorized bursts with respect to the preceding inter-burst  
133 intervals (IBIs; see Methods), during which no other action potentials occurred. We  
134 classified these IBIs in bins (300, 500, 700 and 900 ms) and tagged bursts based on  
135 the IBI values (Fig. 2C). We characterized the driving input leading to bursts with  
136 specific IBIs by burst-triggered averaging the input current ( $I_{BTA}$ ; an example shown in  
137 Fig. 2D). Our analysis produced a single  $I_{BTA}$  for each of the four IBIs in each  
138 preparation (N=23).  $I_{BTA}$ 's of each preparation were first normalized in amplitude by the  
139 (negative) peak value of the  $I_{BTA}$  at IBI = 300 ms (Fig. 2E; average shown in Fig. 2F) to  
140 examine how peak amplitude ( $I_{peak}$ ) varied with IBI. These data were then normalized in  
141 time (Fig. 2G) to examine the effect of IBI on peak phase ( $\Delta_{peak}$ ) and the rise ( $slope_{up}$ )  
142 and fall ( $slope_{down}$ ) slopes of the input current across preparations. We found that IBI  
143 had a significant effect on  $I_{peak}$ ,  $\Delta_{peak}$ ,  $slope_{up}$  and  $slope_{down}$  (all one-way RM-ANOVA  
144 on ranks; data included in Figure 2-source data). In particular, larger IBIs corresponded  
145 to larger  $I_{peak}$  values (Fig. 2F-2H;  $p < 0.001$ ,  $\chi^2 = 65.87$ ) with smaller (more advanced)  
146  $\Delta_{peak}$  (Fig. 2I;  $p < 0.001$ ,  $\chi^2 = 41.35$ ). The change in  $\Delta_{peak}$  was due to a decrease in

147  $slope_{up}$  ( $p < 0.001$ ,  $\chi^2 = 65.25$ ), whereas  $slope_{down}$  did not vary as much (Figs. 2J-2K;  
148  $p = 0.002$ ,  $\chi^2 = 14.77$ ).

### 149 *The burst onset phase of the LP neuron oscillation depends on its synaptic input*

150 Injection of noise current revealed that the timing of the LP response is  
151 exquisitely sensitive to the duration and amplitude of inputs. In the intact system, the  
152 primary determinant of input duration and amplitude is the network period ( $P$ ), as  
153 increasing  $P$  increases both presynaptic pacemaker burst duration (Hooper, 1997b, a)  
154 and synaptic strength (Manor et al., 1997; Nadim and Manor, 2000). To explore the  
155 effect of the duration and strength of the synaptic input, we used dynamic clamp to  
156 drive the LP neuron with a realistic synaptic conductance waveform.

157 We constructed this realistic waveform by measuring the synaptic current input  
158 to the LP neuron during ongoing pyloric oscillations (Fig. 3A). These measurements  
159 showed the two components of inhibitory synaptic input: those from the pacemaker AB  
160 and PD neurons (left arrow) and those from the follower PY neurons (right arrow). In  
161 each cycle, the synaptic current always had a single peak, but the amplitude and  
162 phase of this peak showed variability across preparations (Fig. 3B, average in blue).

163 The realistic conductance input was injected periodically with strength  $g_{max}$  (Fig.  
164 3C). For any fixed  $g_{max}$ ,  $\phi_{LP}$  decreased as a function of  $P$  (Fig. 3D), i.e., the relative  
165 onset of the LP burst was advanced in slower rhythms. In contrast to the effect of  $P$ , for  
166 any given  $P$ ,  $\phi_{LP}$  increased sublinearly as a function of  $g_{max}$  (Fig. 3E). Fig. 3F combines  
167 the simultaneous influence of both parameters on  $\phi_{LP}$ . The results shown in Fig. 3D  
168 indicate that the LP neuron intrinsic properties alone do not produce phase constancy.  
169 However, level sets of  $\phi_{LP}$  (highlighted for three values in Fig. 3F), indicate that phase  
170 could be maintained over a range of  $P$  values, if  $g_{max}$  increases as a function of  $P$ . This  
171 finding was predicted by our previous modeling work, in which we suggested that  
172 short-term synaptic depression promotes phase constancy by increasing synaptic  
173 strength as a function of  $P$  (Manor et al., 2003; Bose et al., 2004). We will further  
174 discuss the role of synaptic depression below.

175 To clarify the results of Fig. 3, it is worth examining the extent of phase  
176 maintenance for fixed  $g_{max}$ . An example of this is shown in Fig. 4A (turquoise plots). A  
177 comparison of these data with the theoretical cases in which either delay or phase is  
178 constant suggests that the LP neuron produces relatively good phase maintenance, at

179 least much better in comparison with constant delay. However, this conclusion is  
180 misleading because, in these experiments, the duty cycle of the synaptic input was  
181 kept constant. Therefore, most of the phase maintenance is due the fact that the  
182 synaptic input keeps perfect phase. In fact, if the reference point measures phase  
183 relative to the end –rather than onset– of the PD burst (Fig. 4B), phase maintenance of  
184 the LP neuron is barely better than in the constant delay case (Fig. 4A, purple plots). It  
185 is therefore clear that phase maintenance by the LP neuron would require the  
186 properties of the synaptic input to change as a function of  $P$ , a hallmark of short-term  
187 synaptic plasticity (Fortune and Rose, 2001; Grande and Spain, 2005). As mentioned  
188 above, short-term plasticity such as depression could produce changes in  $g_{max}$  as a  
189 function of  $P$ . Independently of  $g_{max}$ , the peak time of the synaptic current is another  
190 parameter that could change with  $P$  and influence the timing of the postsynaptic burst.  
191 We therefore proceeded to systematically explore the influence of  $P$ ,  $g_{max}$  and the  
192 synaptic peak time on  $\varphi_{LP}$ .

### 193 *A systematic exploration of synaptic input parameters on the phase of the LP neuron*

194 For a detailed exploration of the influence of the synaptic input on  $\varphi_{LP}$ , we  
195 approximated the trajectory of the (unitary) synaptic conductance in one cycle by a  
196 simple triangle (Fig. 5A), which could be defined by three parameters: duration ( $T_{act}$ ),  
197 peak time ( $t_{peak}$ ) and amplitude ( $g_{max}$ ) (Fig. 5B). This simplified triangular synaptic  
198 conductance waveform could then be repeated with any period ( $P$ ) to mimic the  
199 realistic synaptic input to the LP neuron. For a given synaptic duration  $T_{act}$ , the peak  
200 phase of the synapse can be defined as  $\Delta_{peak} = t_{peak} / T_{act}$ . The parameter  $\Delta_{peak}$  is  
201 known to vary as a function of  $P$  (Tseng et al., 2014) and, in a previous study, we found  
202 that  $\Delta_{peak}$  may influence the activity of the postsynaptic neuron, independent of  $P$  and  
203  $g_{max}$  (Mamiya and Nadim, 2004). We therefore systematically explored the influence of  
204 three parameters of the synaptic input ( $P$ ,  $g_{max}$  and  $\Delta_{peak}$ ) on  $\varphi_{LP}$ .

205 As with the realistic synaptic waveforms (Fig. 3), we used the dynamic clamp  
206 technique to apply the triangular conductance waveform periodically to the LP neuron  
207 in the presence of the synaptic blocker picrotoxin. Across different runs within the same  
208 experiment, the parameters  $P$ ,  $g_{max}$  and  $\Delta_{peak}$  were changed on a grid (see Methods). In  
209 addition, all combinations of these three parameter values were run in two conditions in  
210 the same experiment, 1: with constant duration, i.e., constant  $T_{act}$  across different  $P$   
211 values (C-Dur of 300 ms), and 2: with constant duty cycle, i.e.,  $T_{act}$  changing

212 proportionally to  $P$  (C-DC of 0.3; Fig. 5C). Using these protocols, we measured the  
213 effects of synaptic parameters on  $\varphi_{LP}$  (Fig. 5D).

214 The LP neuron produced burst responses that followed the synaptic input in a  
215 1:1 manner across all values of  $P$  that were used (Fig. 6A1). When  $g_{max}$  and  $\Delta_{peak}$  were  
216 kept constant,  $\varphi_{LP}$  decreased as a function of  $P$  (Fig. 6A2). This decrease was always  
217 larger for the C-Dur case than the C-DC case. For both C-DC and C-Dur, this trend  
218 was seen across all values of  $\Delta_{peak}$  and  $g_{max}$  (Fig. 6A3). The effect of  $P$  on  $\varphi_{LP}$  was  
219 highly significant for both C-DC (Three-Way ANOVA,  $p < 0.001$ ,  $F = 100.677$ ) and C-Dur  
220 (Three-Way ANOVA,  $p < 0.001$ ,  $F = 466.424$ ), indicating that the period and duration of  
221 the inhibitory input to the LP neuron had a significant effect on its phase.

222 Changing  $g_{max}$  produced a large effect on the level of hyperpolarization in the  
223 LP neuron, but this usually translated to only a small or modest effect on the time to the  
224 first spike following inhibition (Fig. 6B1). Overall, increasing  $g_{max}$  at constant values of  $P$   
225 and  $\Delta_{peak}$  produced a significant but only small to moderate increase in  $\varphi_{LP}$  (Three-Way  
226 ANOVA,  $p < 0.001$ ,  $F = 10.798$ ). Although increasing  $g_{max}$  produced the same qualitative  
227 effect for both the C-DC and C-Dur (e.g., Fig. 6B2),  $\varphi_{LP}$  in the C-DC case was  
228 restricted to a smaller range (Fig. 6B3 top vs. bottom panels). Overall, this increase  
229 was robust for most values of  $P$  and  $\Delta_{peak}$  (Fig. 6B3).

230 Increasing  $\Delta_{peak}$  for a constant value of  $P$  and  $g_{max}$  (Fig. 6C1), produced a small  
231 but significant increase in  $\varphi_{LP}$  (Three-Way ANOVA,  $p < 0.001$ ,  $F = 17.172$ ). This effect  
232 was robust for most values of  $P$  and  $g_{max}$ , for both C-DC and C-Dur (Fig. 6C2 and 6C3).

233 These results showed that all three parameters that define the shape of the  
234 IPSC influence  $\varphi_{LP}$ . Clearly, the strongest effect is the decrease in  $\varphi_{LP}$  as a function of  
235  $P$ . However,  $\varphi_{LP}$  modestly increases as a function of the other two parameters,  $g_{max}$   
236 and  $\Delta_{peak}$ . This raised the question how  $g_{max}$  and  $\Delta_{peak}$  would have to change in  
237 coordination as a function of  $P$  to counteract the effect of  $P$  on  $\varphi_{LP}$  and achieve phase  
238 constancy.

### 239 *Coordinated changes of $g_{max}$ and $\Delta_{peak}$ produce the largest effect on phase*

240 To explore how  $g_{max}$  and  $\Delta_{peak}$  might interact to influence  $\varphi_{LP}$ , we examined the  
241 sensitivity of  $\varphi_{LP}$  to these two parameters, individually and in combination, for all values  
242 of  $P$  in our data (see Methods). Sensitivity of  $\varphi_{LP}$  to these two parameters varied across  
243  $P$  values, with larger sensitivity at lower values of  $P$  (Two-Way RM-ANOVA,  $p < 0.001$ ,



244 F=16.054; data included in **Figure 7-source data**). For simplicity, we averaged the  
245 sensitivity values across different  $P$  values to obtain an overall measure of the  
246 influence of  $g_{max}$  and  $\Delta_{peak}$ . These results showed that, for the C-DC case,  $\varphi_{LP}$  had a  
247 positive sensitivity to  $g_{max}$  and a smaller positive sensitivity to  $\Delta_{peak}$  (**Fig. 7A**). The  
248 sensitivity was largest if the two parameters were varied together ( $g_{max} + \Delta_{peak}$ ) and  
249 smallest if they were varied in opposite directions ( $g_{max} - \Delta_{peak}$ ; Two-Way RM-ANOVA,  
250  $p < 0.001$ ,  $F = 3.330$ ). Similarly, these sensitivity values were also significantly different  
251 for the C-Dur case (**Fig. 7B**; Two-Way RM-ANOVA,  $p < 0.001$ ,  $F = 2.892$ ), with largest  
252 sensitivity for  $g_{max} + \Delta_{peak}$  and smallest for  $g_{max} - \Delta_{peak}$ .

### 253 *Level sets of $\varphi_{LP}$ in the $P$ - $g_{max}$ - $\varphi_{peak}$ space for C-DC and C-Dur cases*

254 To search for phase constancy across different  $P$  values in our dataset, we  
255 expressed  $\varphi_{LP}$  as a function of the three IPSC parameters,  $P$ ,  $g_{max}$  and  $\Delta_{peak}$ :  
256  $\varphi_{LP} = \Phi(P, g_{max}, \Delta_{peak})$ . **Figure 8** shows heat map plots of the function  $\Phi$ , plotted for the  
257 range of values of  $P$  and  $\Delta_{peak}$  and four values of  $g_{max}$ . In these plots, phase constancy  
258 can be seen as the set of values in each graph that are isochromatic, indicating the  
259 level sets of the function  $\Phi$ . These level sets are mathematically defined as  
260 hypersurfaces on which the function has a constant value:  $\Phi(P, g_{max}, \Delta_{peak}) = \varphi_c$ . For the  
261 C-DC case, in each  $g_{max}$  section of the plot, the level sets (e.g.  $\varphi_c = 0.34$  denoted in  
262 white) spanned a moderate range of  $P$  values as  $\Delta_{peak}$  increased (**Fig. 8A1**). The span  
263 of  $P$  values across all four panels indicates the range of cycle periods for which phase  
264 constancy could be achieved by varying  $g_{max}$  and  $\Delta_{peak}$ . This range of  $P$  values  
265 (spanned by the white curves) was considerably smaller for the C-Dur case (**Fig. 8A2**).

266 For any constant phase value  $\varphi_c$ , these level sets can be expressed as

$$267 \quad P = P_{\varphi_c}(g_{max}, \Delta_{peak}),$$

268 which describes a surface in the 3D space, yielding the  $P$  value for which phase can be  
269 maintained at  $\varphi_c$ , for the given values of  $g_{max}$  and  $\Delta_{peak}$ . The level set indicated by the  
270 white curves in panel A for the C-DC case is plotted as a heat map in **Fig. 8B1** and can  
271 be compared with the same plot for the C-Dur case in **Fig. 8B2**. The range of colors in  
272 each plot (marked next to each panel) indicates the range of  $P$  values for which phase  
273 can be kept at  $\varphi_c = 0.34$ . To reveal how this range depends on the desired phase, we  
274 measured this range for all values of  $\varphi_c$  between 0.2 and 0.8 (**Figs. 8C1 and 8C2**). We

275 found that the LP neuron could not achieve phases below 0.3 in the C-DC case (Fig.  
276 8C1), which is simply because the neuron never fired during the inhibitory synaptic  
277 current (which had a duty cycle of 0.3). Furthermore, the range of  $P$  values for which  
278 the LP phase could be maintained by varying  $g_{max}$  and  $\Delta_{peak}$  was much larger for C-DC  
279 inputs compared to C-Dur Inputs, for all  $\varphi_c$  values between 0.31 and 0.54.

### 280 *A model of synaptic dynamics could predict activity onset phase of the LP neuron*

281 To gain a better understanding of our experimental results, we derived a  
282 mathematical description of the phase of a follower neuron such as LP, based on the  
283 following assumptions: 1, that the firing time of this neuron was completely determined  
284 by its synaptic input, 2, that in each cycle the synaptic conductance  $g_{syn}$  increased to a  
285 maximum value  $g_{max}$  for a time interval  $T_{act}$  (the active duration of the synapse) and  
286 decayed to 0 otherwise, and 3, that the follower neuron remained inactive when  $g_{syn}$   
287 was above some threshold  $g^*$ . The derivation of this model is described in the  
288 Methods.

289 This simple model provided a mathematical description of  $\varphi_{LP}$  as a function of  
290  $P$ ,  $g_{max}$  and  $\Delta_{peak}$ , for the C-Dur and C-DC cases. In the C-Dur case (Equation (7)), as  $P$   
291 increased,  $\varphi_{LP}$  decayed and approached 0 like  $1/P$ . In contrast, in the C-DC case  
292 (Equation (8)),  $\varphi_{LP}$  approached its lower limit  $\Delta_{peak} \cdot DC$ , as  $P$  increased, and thus  
293 behaved very differently than in the C-Dur case.

294 We used these equations to describe  $g_{max}$  as a function of  $P$  (for any given  
295  $\Delta_{peak}$ ) so that LP maintained a constant phase  $\varphi_c$ , (Equation (10) for the C-DC case).  
296 Alternatively,  $\Delta_{peak}$  could be given as a function of  $P$  (for any given  $g_{max}$ , Equation (11)  
297 for the C-DC case). We used these derivations to compare how phase constancy  
298 depends on  $g_{max}$  or  $\Delta_{peak}$  in the C-DC case. A comparison of these two cases can be  
299 seen in Fig. 9A, where either  $g_{max}$  (green) or  $\Delta_{peak}$  (blue) is varied to keep  $\varphi_{LP}$  constant  
300 at  $\varphi_c=0.34$  across different  $P$  values. (The red curve is the depressing case, described  
301 below.) As the figure shows, phase constancy can be achieved by varying either  
302 parameter, but each parameter produces a different range of  $P$  across which phase is  
303 maintained.

304 These equations and their corresponding counterparts for the C-Dur case can  
305 be used to calculate the range of  $P$  values over which changing  $\Delta_{peak}$  (from 0 to 1) can  
306 maintain a constant phase  $\varphi_c$ . If  $\Delta P$  denotes the range of  $P$  values for which phase can

307 be constant, it is straightforward to show that  $\Delta P_{DC} > \Delta P_{Dur}$  (compare black and blue  
308 curves in Fig. 9B and 9C; see Methods for derivation).

309 Two additional points are notable in Fig. 9C. First, the lower bound on  $\varphi_{LP}$  for  
310 which phase constancy can occur is smaller in the C-Dur than the C-DC case. This is  
311 because we have assumed that in the C-DC case the LP neuron cannot fire during  
312 inhibition (i.e., until after  $\Delta_{peak} DC$ ). Second, for  $\varphi_c$  larger than  $\sim 0.5$ ,  $\Delta P$  is larger for the  
313 C-Dur case. This occurs because Equation (12) can no longer be satisfied when  $\varphi_c$  is  
314 large. That is, with constant duty cycle, it is not possible to produce an arbitrarily large  
315 follower neuron phase, but with constant duration, any large phase is attainable if the  
316 cycle period is not much larger than the synaptic duration. These findings are  
317 consistent with our experimental results described above (see Fig. 8).

318 The pacemaker synaptic input to the LP neuron shows short-term synaptic  
319 depression (Rabbah and Nadim, 2007). In a previous modeling study, we explored how  
320 the phase of a follower neuron was affected when the inhibitory synapse from an  
321 oscillatory neuron to this follower had short-term synaptic depression (Manor et al.,  
322 2003). In that study the role of the parameter  $\Delta_{peak}$  was not considered. We now  
323 consider how the presence of short-term synaptic depression influences phase  
324 constancy by changing both  $g_{max}$  and  $\Delta_{peak}$ . As stated in the Methods (Equation (16)),  
325 the effect of synaptic depression on synaptic strength can be obtained as  
326  $g_{max} = \bar{g}_{max} \cdot s_{max}(P)$ , where  $s_{max}$  is an increasing function whose value approaches 1  
327 as  $P$  increases. This indicates that the synapse becomes stronger due to more  
328 recovery from depression at longer cycle periods. When synaptic depression dictates  
329 how  $g_{max}$  varies with  $P$  and  $\Delta_{peak}$  also varies with  $P$  and  $g_{max}$  (Equation (11)), the  
330 simultaneous changes in  $g_{max}$  and  $\Delta_{peak}$  (red) greatly increase the range of  $P$  values  
331 over which  $\varphi_{LP}$  is constant (Fig. 9A).

332 Note that the C-DC case with short-term depression spans a larger range of  $P$   
333 values than the non-depressing case (Fig. 9B). Similarly, the range of  $P$  values for  
334 which phase can be maintained is larger than the non-depressing case across  $\varphi_{LP}$   
335 values, except where  $\varphi_{LP}$  is so large that the depressing synapse operates outside its  
336 dynamic range (Fig. 9C). These results are consistent with our experimental results,  
337 indicating that although phase constancy can be achieved when either  $g_{max}$  or  $\Delta_{peak}$   
338 increases with  $P$ , a concomitant increase of both - which could occur for example with

339 a depressing synapse - greatly expands the range of  $P$  values for which a constant  
340 phase is maintained.

## 341 **Discussion**

### 342 *The importance of phase in oscillatory networks*

343 A common feature of oscillatory networks is that the activities of different  
344 neuron types are restricted to specific phases of the oscillation cycle. For example,  
345 different hippocampal and cortical neurons are active in at least three distinct phases of  
346 the gamma rhythm (Hajos et al., 2004; Hasenstaub et al., 2005), and distinct  
347 hippocampal neuron types fire at different phases of the theta rhythm and sharp wave-  
348 associated ripple episodes (Somogyi and Klausberger, 2005).

349 Experimental studies quantify the latency of neural activity with respect to a  
350 reference time in the cycle, but in most cases, these latencies are normalized and  
351 reported as phase. Distinct neuron types can maintain a coherent activity phase,  
352 despite wide variations in the network frequency (30-100 Hz for gamma rhythms, 4-7  
353 Hz for theta rhythms, and 120-200 Hz for sharp wave-associated ripple episodes).  
354 Phase-specific activity of different neuron types is proposed to be important in rhythm  
355 generation (Wang, 2010), and indicates the necessity of precise timing for producing  
356 proper circuit output and behavior (Kopell et al., 2011). For example, phase locking of  
357 spike patterns to oscillations is important for auditory processing, single cell and  
358 network computations and Hebbian learning rules (Kayser et al., 2009; McLelland and  
359 Paulsen, 2009; Panzeri et al., 2010). For brain oscillations, phase relationships may  
360 provide clues about the underlying circuit connectivity and dynamics, but a behavioral  
361 correlate of varying frequencies is not obvious. In contrast, the activity phase of distinct  
362 neuron types in rhythmic motor circuits is a tangible readout of the timing of motor  
363 neurons and muscle contractions, thus defining phases of movement (Grillner and El  
364 Manira, 2015; Kiehn, 2016; Le Gal et al., 2017; Bidaye et al., 2018). Because  
365 meaningful behavior depends crucially on proper activity phases, whether neurons  
366 maintain their activity phase in face of changes in frequency simply translates to  
367 whether the movement pattern changes as it speeds up or slows down.

### 368 *Determinants of phase*

369 In oscillatory networks, the activity phases of different neuron types depend to  
370 different degrees on the precise timing and strength of their synaptic inputs (Oren et

371 al., 2006). Our results from noise current injections showed that the timing of the LP  
372 neuron is strongly dependent on the timing of inputs it receives. Dynamic clamp  
373 injection of realistic or triangular conductance waveforms with different periods ( $P$ )  
374 indicated that  $\varphi_{LP}$  was largely determined by the duration of the synaptic input.  $\varphi_{LP}$   
375 changed substantially with  $P$  when inputs had constant duration, but much less when  
376 inputs had a constant duty cycle, i.e., when duration scaled with  $P$ . However, our  
377 experiments also showed that inputs of constant duty cycles alone are insufficient for  
378 phase constancy.  $\varphi_{LP}$  decreased with  $P$  even with a constant duty cycle of inputs, but  
379 increased with either synaptic strength ( $g_{max}$ ) or peak phase of the synaptic input  
380 ( $\Delta_{peak}$ ). The increase in  $\varphi_{LP}$  had similar sensitivity to  $g_{max}$  and  $\Delta_{peak}$ , and therefore a  
381 larger sensitivity to a simultaneous increase in both. Consequently, it was possible to  
382 keep  $\varphi_{LP}$  constant over a wide range of cycle periods by increasing both parameters  
383 with  $P$ .

384         The fact that an increase in  $g_{max}$  with  $P$  promotes phase constancy is  
385 biologically relevant, as short-term depression in pyloric synapses means that synaptic  
386 strength indeed increases with  $P$  (Manor et al., 1997). Previous modeling studies show  
387 that short-term synaptic depression of inhibitory synapses promotes phase constancy  
388 (Nadim et al., 2003; Bose et al., 2004), largely because of longer recovery times from  
389 depression at larger values of  $P$ .

390         The finding that an increase of  $\Delta_{peak}$  with  $P$  promotes phase maintenance is  
391 somewhat surprising, as we have previously shown that  $\Delta_{peak}$  in LP actually decreases  
392 with  $P$  (Manor et al., 1997; Tseng et al., 2014). On the face of it, this suggests that an  
393 increase in  $\Delta_{peak}$  is not a strategy employed in the intact circuit. However, the caveat is  
394 that such results may critically depend on the cause of the change in  $P$ , either  
395 technically and biologically. While in our current study we varied  $\Delta_{peak}$  with direct  
396 conductance injection into LP, previous results were obtained by changing the  
397 waveform and period of the presynaptic pacemaker neurons. When  $P$  is changed in an  
398 individual preparation by injecting current into or voltage-clamping the pacemakers,  
399 phase of follower neurons is not particularly well maintained. An example of this is  
400 shown in Fig. 1, where  $\varphi_{LP}$  values fall between constant phase and constant duration  
401 and, additionally, all pyloric neurons show behavior that falls between constant phase  
402 and constant latencies (Hooper, 1997b, a). This may reflect that neurons are not  
403 keeping phase particularly well when the only cause of changing  $P$  is the presynaptic

404 input. This is supported by the observation that even during normal ongoing pyloric  
405 activity, phases change with cycle-to-cycle variability of  $P$  in individual preparations  
406 (Bucher et al., 2005). However, it does not preclude the possibility that  $\Delta_{peak}$  plays an  
407 important role in stable phase relationships when  $P$  differs because of temperature,  
408 neuromodulatory conditions, or inter-individual variability (discussed below).

409 It is noteworthy that a change in the synaptic strength or peak phase with  $P$  is  
410 not peculiar to graded synapses. The fact that short-term synaptic plasticity can act as  
411 a frequency-dependent gain control mechanism is well known for many spike-mediated  
412 synaptic connections. In bursting neurons, the presence of a combination of short-term  
413 depression and facilitation in the same spike-mediated synaptic interaction could also  
414 result in changes in the peak phase of the summated synaptic current as a function of  
415 burst frequency and duration, and the intra-burst spike rate (Markram et al., 1998).

416 The mathematical model in the current study provides mechanistic explanations  
417 for several of our experimental findings. First, it can be used to produce a quantitative  
418 measure of phase, given the values of  $g_{max}$ ,  $\Delta_{peak}$  and  $P$ . Thus, these equations can be  
419 used to compare the C-DC and C-Dur cases, which match our experimental results.  
420 They show that, for most phase values, the C-DC case provides a larger range of cycle  
421 periods at which phase constancy can occur. Second, these equations provide the  
422 activity phase no matter how the pacemaker synaptic input duration changes with cycle  
423 period. For instance, our experiments were conducted by changing synaptic input  
424 through sampling individual values of the parameter pairs  $g_{max}$  and  $\Delta_{peak}$ , and then  
425 calculating the ensuing phase. We then used fitting to find level sets of constant phase  
426 (Fig. 8). In contrast, when we combined our mathematical derivation here with previous  
427 results on the role of short-term synaptic depression (Bose et al., 2004), we could  
428 demonstrate how a neuronal circuit can naturally follow a level set of phase (Equations  
429 (7), (8), (15) and (16)). Moreover, we showed that the combined increase in  $g_{max}$  and  
430  $\Delta_{peak}$  with  $P$  produces a larger range of periods for phase constancy than increasing  
431 either parameter alone. In short, this mathematical formulation produces a simple  
432 quantitative distillation of our experimental results.

433 In this study, we did not explore the role of the intrinsic properties of the LP  
434 neuron on its phase. In separate experiments, we simultaneously measured post-  
435 inhibitory rebound properties in synaptically isolated LP neurons and the levels of  
436 voltage-gated ionic currents (the transient potassium current  $I_A$  and the

437 hyperpolarization-activated inward current ( $I_h$ ) that influence rebound spiking. These  
438 data were not included in this study for brevity and because they showed that the  
439 timing of post-inhibitory spiking was relatively stable across preparations. Therefore,  
440 we would expect the contribution of intrinsic properties in controlling the timing of the  
441 LP neuron burst onset to be relatively small. However, this result does not generalize  
442 to all follower neurons. For example, the follower ventral dilator (VD) and PY neurons  
443 have a much higher levels of  $I_A$ , which in turn has a larger effect on the timing of post-  
444 inhibitory spiking. In a set of computational studies, we addressed the role of  $I_A$  in  
445 determining the burst phase in response to periodic inputs (Zhang et al., 2008, 2009)  
446 and in conjunction with short-term depression in the synaptic input (Bose et al., 2004).  
447 An experimental clarification of the relative contribution of intrinsic properties vs.  
448 synaptic input could be done with controlled dynamic clamp synaptic input, such as  
449 those used in the current study, injected in PY or VD neurons. Such a data set would  
450 fittingly complement the results of the current study to elucidate more general rules in  
451 determining the activity phase of neurons in an oscillatory network.

#### 452 *Phase relationships in changing temperatures*

453 An interesting case is provided by the observation that phases are remarkably  
454 constant when pyloric rhythm frequency is changed with temperature. Tang et al.  
455 (2012) report a 4-fold decrease in  $P$  of the pyloric rhythm between 7 and 23° C. In this  
456 study, none of the pyloric phases changed significantly, and it is worth noting that  
457 under conditions of changing temperatures, the relationships between  $P$ ,  $g_{max}$ , and  
458  $\Delta_{peak}$  appeared to be fundamentally different from when  $P$  is changed at a constant  
459 temperature. Presynaptic voltage trajectories scaled with changing  $P$ , and  $\Delta_{peak}$  of  
460 postsynaptic currents was independent of  $P$ , in contrast to the decrease described at  
461 constant temperature (Manor et al., 1997; Tseng et al., 2014). Amplitudes of synaptic  
462 potentials did not change with temperature, despite an increase in synaptic current  
463 amplitudes with increasing temperature (and associated decrease in  $P$ ). This is in  
464 contrast to the positive relationship between  $g_{max}$  and  $P$  that results from synaptic  
465 depression at a constant temperature (Manor et al., 1997). Therefore, it appears that  
466 the likely substantial effects of temperature on synaptic dynamics and ion channel  
467 gating are subject to a set of compensatory adaptations different from when  $P$  is  
468 changed at constant temperature.

#### 469 *Variability and slow compensatory regulation of phase*

470 Phase maintenance in the face of changing  $P$  in an individual animal requires  
471 the appropriate short-term dynamics of synaptic and intrinsic neuronal properties. The  
472 fact that characteristic (and therefore similar) phase relationships can also be observed  
473 under the same experimental conditions across individual preparations is a different  
474 conundrum, particularly when  $P$  can vary substantially, as is true for brain oscillations  
475 (Hajos et al., 2004; Hasenstaub et al., 2005; Somogyi and Klausberger, 2005). Phases  
476 show different degrees of variability across individuals in a variety of systems, e.g.,  
477 leech heartbeat (Wenning et al., 2018), larval crawling in *Drosophila* (Pulver et al.,  
478 2015), and fictive swimming in zebrafish (Masino and Fetcho, 2005), but in all of these  
479 cases phases are not correlated with  $P$ . In the pyloric rhythm, phases are also variable  
480 to a degree across individuals, but not correlated with the mean  $P$ , which varies >2-fold  
481 (Bucher et al., 2005; Goillard et al., 2009). This phase constancy occurs despite  
482 considerable inter-individual variability in ionic currents, and is considered the ultimate  
483 target of slow compensatory regulation, i.e., homeostatic plasticity (Marder and  
484 Goillard, 2006; Ma and LaMotte, 2007; Marder et al., 2014). Slow compensation can  
485 also be observed directly when rhythmic activity is disrupted by decentralization, and  
486 subsequently recovers to similar phase relationships over the course of many hours  
487 (Luther et al., 2003). It is interesting to speculate if our findings about how synaptic  
488 parameters must change to keep phase constant would hold across individuals with  
489 different mean  $P$ . The prediction would be coordinated positive correlations of both  $g_{max}$   
490 and  $\Delta_{peak}$  with  $P$ .

491 Synaptic inputs to the LP neuron show considerable variability across  
492 preparations (e.g., Fig. 3B), which mirrors the variability seen in the levels of voltage-  
493 gated ionic currents in pyloric neurons (Schulz et al., 2006). We did not address the  
494 role and extent of variability in this study, because a proper analysis of variability  
495 required us to first establish the mechanisms that give rise to a consistent output, in  
496 this case phase constancy. Based on our findings regarding the influence of synaptic  
497 parameters on phase, a natural next step is to explore whether the variability of  
498 different parameters defining the synaptic input influences variability of phase or,  
499 alternatively, whether variability in some synaptic parameters may be irrelevant to  
500 phase or restrained by the postsynaptic neuron.

501 *Phase relationships under different neuromodulatory conditions.*



502           The flipside of the question how neurons maintain phase is the question how  
503 their phase can be changed. In motor systems in particular, changes in phase  
504 relationships are functionally important to produce qualitatively different versions of  
505 circuit output, for example to produce different gaits in locomotion (Vidal-Gadea et al.,  
506 2011; Grillner and El Manira, 2015; Kiehn, 2016). The activity of neural circuits is  
507 flexible, and much of this flexibility is provided by modulatory transmitters and  
508 hormones which alter synaptic and intrinsic neuronal properties (Brezina, 2010; Harris-  
509 Warrick, 2011; Jordan and Slawinska, 2011; Bargmann, 2012; Marder, 2012; Bucher  
510 and Marder, 2013; Nadim and Bucher, 2014 ). The pyloric circuit is sensitive to a  
511 plethora of small molecule transmitters and neuropeptides which affect cycle frequency  
512 and phase relationships (Marder and Bucher, 2007; Stein, 2009; Daur et al., 2016).  
513 Indeed, extensive research has indicated the role of amine modulation of synaptic  
514 strength and neuronal firing phase in the pyloric circuit, and how amine modulation of  
515 synaptic and intrinsic firing properties changes firing phases (Johnson et al., 2003;  
516 Gruhn et al., 2005; Johnson et al., 2005; Peck et al., 2006; Harris-Warrick and  
517 Johnson, 2010; Harris-Warrick, 2011; Kvarta et al., 2012). With respect to our findings,  
518 any given neuromodulator could act presynaptically to alter  $P$ , duration, or duty cycle  
519 on the one hand, and  $g_{max}$  and  $\Delta_{peak}$  on the other. In addition, the neuromodulator could  
520 affect the postsynaptic neuron's properties and alter its sensitivity to any of these  
521 parameters. Therefore, our findings could not just further our understanding of how  
522 phase can be maintained across different rhythm frequencies, but also provide a  
523 framework for testing if and how changes in synaptic dynamics may contribute to  
524 altering phase relationships under different neuromodulatory conditions.

## 525 **Materials and Methods**

526           Adult male crabs (*Cancer borealis*) were acquired from local distributors and  
527 maintained in aquaria filled with chilled (10-13°C) artificial sea water until use. Crabs  
528 were prepared for dissection by placing them on ice for 30 minutes. The dissection was  
529 performed using standard protocols as previously described (Tohidi and Nadim, 2009;  
530 Tseng and Nadim, 2010). The STNS, including the four ganglia (esophageal ganglion,  
531 two commissural ganglia, and the STG) and their connecting nerves, and the motor  
532 nerves arising from the STG, were dissected from the stomach and pinned into a  
533 Sylgard (Dow-Corning) lined Petri dish filled with chilled saline. The STG was  
534 desheathed, exposing the somata of the neurons for intracellular impalement.

535 Preparations were superfused with chilled (10-13°C) physiological *Cancer* saline  
536 containing: 11 mM KCl, 440 mM NaCl, 13 mM CaCl<sub>2</sub> · 2H<sub>2</sub>O, 26 mM MgCl<sub>2</sub> · 6H<sub>2</sub>O,  
537 11.2 mM Trizma base, 5.1 mM maleic acid with a pH of 7.4.

538 Extracellular recordings were obtained from identified motor nerves using  
539 stainless steel electrodes, amplified using a differential AC amplifier (A-M Systems,  
540 model 1700). One lead was placed inside a petroleum jelly well created to electrically  
541 isolate a small section of the nerve, the other right outside of it. For intracellular  
542 recordings, glass microelectrodes were prepared using the Flaming-Brown  
543 micropipette puller (P97; Sutter Instruments) and filled with 0.6 M K<sub>2</sub>SO<sub>4</sub> and 20 mM  
544 KCl. Microelectrodes used for membrane potential recordings had resistances of 25-  
545 30MΩ; those used for current injections had resistances of 15-22 MΩ. Intracellular  
546 recordings were performed using Axoclamp 2B and 900A amplifiers (Molecular  
547 Devices). Data were acquired using pClamp 10 software (Molecular Devices) and the  
548 Netsuite software (Gotham Scientific), sampled at 4-5 kHz and saved on a PC using a  
549 Digidata 1332A (Molecular Devices) or a PCI-6070-E data acquisition board (National  
550 Instruments).

551 Individual pyloric neurons were impaled and identified via their membrane  
552 potential waveforms, correspondence of spike patterns with extracellular nerve  
553 recordings, and interactions with other neurons within the network (Weimann et al.,  
554 1991).

### 555 *Constructing realistic graded IPSC waveforms*

556 Inhibitory postsynaptic currents (IPSCs) were recorded from LP neurons during  
557 the ongoing rhythm using two-electrode voltage clamp and holding the LP neuron  
558 at -50mV, far from the IPSC reversal potential of ~ -80 mV (Fig. 3A). We refer to the  
559 total current measured in the voltage clamped LP neuron during the activity of the PD  
560 and PY neurons as a synaptic current for the following reasons: 1, the synaptically  
561 isolated LP neuron produces tonic spiking activity (see, e.g., Fig. 2B), and 2, holding  
562 the LP neuron at different voltages (e.g. -60 or -110 mV) produces a similarly shaped  
563 current, but with a different amplitude or reversed sign (at -110 mV).

564 When the LP soma is voltage clamped at -50 mV, the axon (which is  
565 electrotonically distant from the soma) produced action potentials following the synaptic  
566 inhibition from the PY neuron and the pacemaker neurons. The onset of the LP neuron

567 action potentials (recorded in the current trace) was used to calculate the mean IPSC  
568 for each experiment averaging the IPSCs over 10-20 cycles. The IPSC waveforms  
569 were then extracted by normalizing both the amplitude and the duration of the mean  
570 IPSC.

#### 571 *Driving the LP neuron with noise current*

572 In these experiments, the preparation was superfused in *Cancer* saline plus  
573  $10^{-5}$  M picrotoxin (PTX; Sigma Aldrich) for 30 minutes to block the synaptic currents to  
574 the LP neuron. The removal of synaptic inhibition onto LP neurons changed the  
575 activity of these neurons from bursting to tonic firing. Then, noise current, generated by  
576 the Ornstein-Uhlenbeck (O-U) process (Lindner), was injected into the LP neurons for  
577 60 minutes using the Scope software (available at  
578 <http://stg.rutgers.edu/Resources.html>, developed in the Nadim laboratory). The  
579 baseline of the noise current was adjusted by adding DC current so that it can provide  
580 enough inhibition to produce silent periods alternating with bursts of action potentials.  
581 The O-U process was defined as

$$dX_t = -\frac{1}{\tau} X_t dt + \sigma dW_t.$$

582

583 The parameters used for noise injection were  $\tau = 10$  to 20 ms,  $\sigma = 200$  pA and a DC  
584 current of -200 to -100 pA. In these experiments we defined bursts as groups of at  
585 least two action potentials with inter-spike intervals < 300 ms, following a gap of at  
586 least 300 ms.

#### 587 *Driving the LP neuron with realistic or triangular IPSC waveforms in dynamic clamp*

588 The dynamic clamp current was injected using the Netclamp software (Netsuite,  
589 Gotham Scientific). We pharmacologically blocked synaptic inputs from the pacemaker  
590 AB and follower PY neurons to the LP neuron by superfusing the preparation in *Cancer*  
591 saline plus  $10^{-5}$  M picrotoxin (PTX; Sigma Aldrich) for 30 minutes. This treatment does  
592 not block the cholinergic synaptic input from the PD neurons for which no clean  
593 pharmacological blocker is known. Although the PD neuron input has some influence  
594 on the LP neuron activity, this input only constitutes <20% of the total pacemaker  
595 synapse and cannot drive oscillations in the follower LP neuron.

596 The LP neuron was driven in PTX with an artificial synaptic current in dynamic  
597 clamp. The synaptic current was given as

598 
$$I_{syn} = g_{syn}(V_{LP} - E_{syn})$$

599 where the synaptic conductance  $g_{syn}$  was a pre-determined waveform, repeated  
600 periodically with period  $P$ , and  $E_{syn}$  was the synaptic reversal potential set to  $-80$  mV  
601 (Zhao et al., 2011).

602 Two sets of dynamic clamp experiments were performed on different animals.  
603 In one set of experiments,  $g_{syn}$  was set to be a triangular waveform. We measured the  
604 effects of four different parameters in these triangle conductance injections (Fig. 1):  
605 peak phase ( $\Delta_{peak}$ ), duration ( $T_{act}$ ), period ( $P$  = time between onsets of dynamic clamp  
606 synaptic injections), and maximal conductance ( $g_{max}$ , the peak value of  $g_{syn}$ ). This  
607 allowed us to explore which combinations of the different parameters influences the LP  
608 phase. Five values for  $P$  were used: 500, 750, 1000, 1500, and 2000 ms, which cover  
609 the typical range of pyloric cycle periods. Three values of  $g_{max}$  were used: 0.1, 0.2 and  
610 0.4  $\mu$ S, consistent with previous measurements of synaptic conductance (Zhao et al.,  
611 2011; Tseng et al., 2014). The value of  $\Delta_{peak}$  was varied to be 0, 0.25, 0.5, 0.75 or 1. In  
612 the same experiment, all runs were done in two conditions: with  $T_{act}$  constant across  
613 different  $P$  values (C-Dur case with  $T_{act} = 300$  ms) or with  $T_{act}$  changing proportionally  
614 to  $P$  (C-DC case with duty cycle  $DC = T_{act} / P = 0.3$ ).

615 In the other set of experiments,  $g_{syn}$  was a realistic IPSC waveform, based on a  
616 pre-recorded IPSC in the LP neuron. In these experiments,  $P$  was varied to be 500,  
617 750, 1000, 1250, 1500, or 2000 ms by scaling the realistic waveform in the time  
618 direction. In these experiments,  $g_{max}$  was set to be 0.1, 0.2, 0.4, 0.6, or 0.8  $\mu$ S. The LP  
619 neuron burst onset delay ( $\Delta t$ ) was measured relative to the onset of the pacemaker  
620 component of the synaptic input (identified by the kink in the synaptic conductance  
621 waveform) in each cycle. The burst phase was calculated as  $\phi_{LP} = \Delta t / P$ . Phase  
622 constancy means that  $\Delta t$  changed proportionally to  $P$ . To measure the LP neuron  
623 phase with respect to the end of the pacemaker input, this reference used was the  
624 point on the synaptic conductance waveform marked by drawing a horizontal line from  
625 the kink that identified the onset of the pacemaker input.

626 *Determining relationship between cycle period (P), synaptic strength ( $g_{max}$ ) and LP*  
627 *phase ( $\varphi_{LP}$ ) using the realistic IPSC waveform*

628 We determined how well the mathematical model derived for constant input  
629 duty cycles (see [Equation \(8\)](#) below), matched the experimental data obtained with  
630 realistic IPSC waveforms. To this end, we fit the model to  $\varphi_{LP}$  values measured for all  
631 values of  $g_{max}$  and  $P$ , using the standard fitting routine 'fit' in MATLAB (Mathworks).

632 *Sensitivity of  $\varphi_{LP}$  to  $g_{max}$  and  $\Delta_{peak}$  across all P values*

633 To explore how  $g_{max}$  and  $\Delta_{peak}$  may interact to influence  $\varphi_{LP}$ , we examined the  
634 sensitivity of  $\varphi_{LP}$  to these two parameters, individually and in combination, for all values  
635 of  $P$  in our data. For each  $P$ , we computed the mean value of  $\varphi_{LP}$  across all  
636 experiments, and all values of  $g_{max}$  (0.1, 0.2, 0.3 and 0.4  $\mu$ S) and  $\Delta_{peak}$  (0, 0.25, 0.5,  
637 0.75 or 1). (The  $\varphi_{LP}$  value for  $g_{max} = 0.3 \mu$ S was obtained in this case by linearly  
638 interpolating the values for 0.2 and 0.4  $\mu$ S.) This produced a 4 by 5 matrix of all values.  
639 For each data point in the matrix, we moved along eight directions ( $+g_{max}$ ,  $+\Delta_{peak}$ ,  $-g_{max}$ ,  
640  $-\Delta_{peak}$ ,  $+g_{max}$  &  $+\Delta_{peak}$ ,  $-g_{max}$  &  $-\Delta_{peak}$ ,  $+g_{max}$  &  $-\Delta_{peak}$ ,  $+g_{max}$  &  $-\Delta_{peak}$ ). Here “+” denotes  
641 increasing and “-” denotes decreasing. We then calculated the change in  $\varphi_{LP}$  per unit  
642  $g_{max}$  (normalized by 0.4  $\mu$ S),  $\Delta_{peak}$ , or both. For example, the sensitivity of  $\varphi_{LP}$  when  
643  $\Delta_{peak}$  was changed from 0.25 to 0.5 was measured as

644 
$$\frac{\varphi_{LP}(\text{at } \Delta_{peak} = 0.5) - \varphi_{LP}(\text{at } \Delta_{peak} = 0.25)}{0.5 - 0.25}$$

645 Similarly, the sensitivity of  $\varphi_{LP}$  when  $g_{max}$  was changed from 0.2 to 0.4 was measured  
646 as

647 
$$\frac{\varphi_{LP}(\text{at } g_{max} = 0.4) - \varphi_{LP}(\text{at } g_{max} = 0.2)}{(0.4 - 0.2) / 0.4}$$

648 These data are provided in [Figure 7-source data](#). As the next step, we averaged the  
649 sensitivity along each aligned direction: [ $+g_{max}$  and  $-g_{max}$ ]; [ $+\Delta_{peak}$  and  $-\Delta_{peak}$ ]; [ $+g_{max}$  &  
650  $+\Delta_{peak}$  and  $-g_{max}$  &  $-\Delta_{peak}$ ]; [ $+g_{max}$  &  $-\Delta_{peak}$  and  $+g_{max}$  &  $-\Delta_{peak}$ ]. This produced the four  
651 cardinal directions, shown in Fig. 7. Finally, we averaged the sensitivity across all  $P$   
652 values.

653 *A model of synaptic dynamics*

654 In the derivation of the model, the firing time of the LP neuron was assumed to  
 655 be completely determined by its synaptic input. This synaptic conductance ( $g_{syn}$ ) was  
 656 assumed to rise and fall with distinct time constants. The following holds over one cycle  
 657 period and therefore time is reset with period  $P$  ( $t \pmod{P}$ ):

$$658 \quad \frac{dg_{syn}}{dt} = \begin{cases} (g_{max} - g_{syn})/\tau_r & t \pmod{P} < t_{peak} \\ -g_{syn} / \tau_s & t \pmod{P} \geq t_{peak} \end{cases} \quad (1)$$

659 where the time  $t_{peak}$ , corresponding to  $\Delta_{peak}$ , is  $t_{peak} = \Delta_{peak} T_{act}$ . We assumed that LP  
 660 neuron remained inactive when  $g_{syn}$  was above a fixed threshold ( $g^*$ ) less than  $g_{max}$ .  
 661 Because the synaptic input is periodic with period  $P$ , we solved for the minimum and  
 662 maximum values of  $g_{syn}$  in each cycle. The minimum ( $g_{lo}$ ) occurred just before the onset  
 663 ( $t = 0$ ) of AB/PD activity, whereas the maximum occurred at the peak synaptic phase  
 664  $\Delta_{peak}$  for the C-Dur case. In the C-DC case,  $T_{act} = DC \cdot P$ , where  $DC$  is the duty cycle  
 665 (fixed at 0.3 in our experiments).

666 To calculate  $g^*$ , we set the value  $t = 0$  so that  $g_{syn}(0) = g_{lo}$  (and, by periodicity,  
 667  $g_{syn}(P) = g_{lo}$ ), and solved the first part of Equation (1) where  $g_{syn}$  increases until  $t = t_{peak}$ .  
 668 This yielded

$$669 \quad g_{peak} = g_{syn}(t_{peak}) = g_{max} + (g_{lo} - g_{max})e^{-t_{peak}/\tau_r} \quad (2)$$

670 We then used the second part of Equation (1) to track the decay of  $g_{syn}$  for  $t_{peak} < t < P$ :

$$671 \quad g_{syn}(t) = g_{peak}e^{-(t-t_{peak})/\tau_s} \quad (3)$$

672 Using Equation (3), we calculated the time  $\Delta t$  at which the synaptic conductance  
 673  $g_{syn}(\Delta t) = g^*$  as follows:

$$674 \quad g^* = g_{peak}e^{-(\Delta t - t_{peak})/\tau_s} \quad (4)$$

675 Solving Equation (4) for  $\Delta t$  yielded

$$676 \quad \Delta t = \tau_s \ln \frac{g(t_{peak})}{g^*} + t_{peak}.$$

677 Dividing this equation by  $P$  yielded  $\phi_{LP}$ :

678 
$$\varphi_{LP} = F(P, g_{max}, \Delta_{peak}) = \frac{\tau_s}{P} \ln \frac{g_{peak}}{g^*} + \frac{t_{peak}}{P}, \quad (5)$$

679 where  $g_{peak}$  is given by Equation (2). This expression provides a description of the  
 680 dependence of  $\varphi_{LP}$  as a function of  $P$ ,  $g_{max}$  and  $\Delta_{peak}$ . To explore the role of the  
 681 parameters in this relationship, we made a simplifying assumption that the synaptic  
 682 conductance  $g_{syn}(t)$  rapidly reached its peak (i.e.,  $\tau_r$  was small), stayed at this value and  
 683 started to decay at  $t = t_{peak}$ . In this case  $g(t) = g_{max}$  on the interval  $(0, t_{peak})$  and the value  
 684 of  $g_{lo}$  is irrelevant. With this assumption, Equation (5) reduced to

685 
$$\varphi_{LP} = \frac{\tau_s}{P} \ln \frac{g_{max}}{g^*} + \frac{t_{peak}}{P}. \quad (6)$$

686 Substituting  $t_{peak} = \Delta_{peak} \cdot T_{act}$  in Equation (6), gave

687 
$$\varphi_{LP} = F(P, g_{max}, \Delta_{peak}) = \frac{1}{P} \left( \tau_s \ln \frac{g_{max}}{g^*} + \Delta_{peak} T_{act} \right), \quad (7)$$

688 which we used to describe the LP phase in the C-Dur case. To describe the C-DC  
 689 case, after substituting  $t_{peak} = \Delta_{peak} \cdot DC \cdot P$ , we obtained

690 
$$\varphi_{LP} = F(P, g_{max}, \Delta_{peak}) = \frac{1}{P} \left( \tau_s \ln \frac{g_{max}}{g^*} \right) + \Delta_{peak} DC. \quad (8)$$

691 Note that these equations also describe the relationship between  $\varphi_{LP}$  with  $T_{act}$  in the C-  
 692 Dur case, and  $DC$  in the C-DC case).

693 Equations (7) and (8) can be used to approximate a range of parameters over  
 694 which  $\varphi_{LP}$  is maintained at a constant value  $\varphi_c$ . To do so, we assumed a specific  
 695 parameter set, say  $(\hat{P}, \hat{g}_{max}, \hat{\Delta}_{peak})$ , satisfies

696 
$$F(\hat{P}, \hat{g}_{max}, \hat{\Delta}_{peak}) = \varphi_c,$$

697 for some fixed phase value,  $\varphi_c$ . We could now ask whether there are nearby  
 698 parameters for which phase remains constant, i.e.,  $F$  remains equal to  $\varphi_c$ . The Implicit  
 699 Function Theorem (Krantz and Parks, 2012) guarantees that this is the case, provided  
 700 certain derivatives evaluated at  $(\hat{P}, \hat{g}_{max}, \hat{\Delta}_{peak})$  are non-zero, which turns out to be true

701 over a large range of parameters. Since the partial derivative with respect to  $\Delta_{peak}$  of  
 702  $F(P, g_{max}, \Delta_{peak})$  at this point is a non-zero constant equal to  $T_{act}/P$  (or  $DC$ ) in the C-Dur  
 703 (or C-DC) case, there is a function  $\Delta_{peak} = h(P, g_{max})$  such that

$$704 \quad F(P, g_{max}, h(P, g_{max})) = \varphi_c \quad (9)$$

705 for values of  $P$  and  $g_{max}$  near  $(\hat{P}, \hat{g}_{max})$ . In other words, the Implicit Function Theorem  
 706 guarantees that small changes in  $P$  and  $g_{max}$  can be compensated for by an appropriate  
 707 choice of  $\Delta_{peak}$  in order to maintain a constant LP phase. A similar analysis can be  
 708 done by solving for  $g_{max}$  in terms of  $P$  and  $\Delta_{peak}$  or by solving for  $P$  in terms of  $g_{max}$  and  
 709  $\Delta_{peak}$ .

710 Keeping  $g_{max}$  (respectively,  $\Delta_{peak}$ ) constant in these equations allows us to  
 711 obtain a relationship between  $P$  and  $\Delta_{peak}$  (respectively,  $g_{max}$ ), for which  $\varphi_{LP}$  is kept  
 712 constant at  $\varphi_c$ . Consider [Equations \(7\) and \(8\)](#) for fixed values of both  $\varphi_{LP} (= \varphi_c)$  and  
 713  $g_{max}$ . Then these equations reduce to simple functional relationships where  $\Delta_{peak}$  can be  
 714 expressed as a function of  $P$ . In the C-DC case, for example, evaluating  $\Delta_{peak}$  from  
 715 [Equation \(8\)](#) produces

$$716 \quad g_{max} = g^* \cdot \exp\left(\frac{P}{\tau_s}(\varphi_c - \Delta_{peak}DC)\right) \quad (10)$$

717 [Equation \(10\)](#) describes how  $g_{max}$  must vary with  $P$  for the system to maintain a  
 718 constant phase  $\varphi_c$  for any given  $\Delta_{peak}$ .

719 Alternatively,  $\Delta_{peak}$  can be expressed as a function of  $P$ . In the C-DC case,  
 720 evaluating  $\Delta_{peak}$  from [Equation \(8\)](#) produces

$$721 \quad \Delta_{peak} = \frac{\varphi_c}{DC} - \frac{\tau_s}{DC \cdot P} \ln \frac{g_{max}}{g^*}, \quad (11)$$

722 [Equation \(11\)](#) can be used to calculate the range of  $P$  values over which changing  $\Delta_{peak}$   
 723 (from 0 to 1) can maintain a constant phase  $\varphi_c$ . Solving  $0 < \Delta_{peak} < 1$  using [Equation](#)  
 724 [\(11\)](#) yields

$$725 \quad \frac{\tau_s}{\varphi_c} \ln \frac{g_{max}}{g^*} < P_{DC} < \frac{\tau_s}{\varphi_c - DC} \ln \frac{g_{max}}{g^*} \quad (12)$$



726 Performing the same procedure in the C-Dur case, we find

$$727 \quad \frac{\tau_s \ln \frac{g_{max}}{g^*}}{\varphi_c} < P_{Dur} < \frac{T_{act}}{\varphi_c} + \frac{\tau_s \ln \frac{g_{max}}{g^*}}{\varphi_c}. \quad (13)$$

728 The lower limits of the two cases ( $P_{DC}$  and  $P_{Dur}$ ) are the same. The upper limit  
729 for  $P_{DC}$  is larger than that of  $P_{Dur}$  if

$$730 \quad \varphi_c < DC \left( 1 + \frac{\tau_s \ln \frac{g_{max}}{g^*}}{T_{act}} \right). \quad (14)$$

731 If  $\Delta P$  denotes the range of  $P$  values that respectively satisfy [Equation \(12\) or \(13\)](#), then  
732  $\Delta P_{DC} > \Delta P_{Dur}$  if the inequality given by [\(14\)](#) holds, which it does for true for  $\tau_s$  and  $g_{max}$   
733 large enough.

#### 734 *Adding synaptic depression to the model of synaptic dynamics*

735 In a previous modeling study, we explored how the phase of a follower neuron  
736 was affected when the inhibitory synapse from an oscillatory neuron to this follower  
737 had short-term synaptic depression (Manor et al., 2003). In that study the role of the  
738 parameter  $\Delta_{peak}$  was not considered. It is straightforward to add synaptic depression to  
739 [Equations \(7\) and \(8\)](#) and therefore examine how phase is affected if  $\Delta_{peak}$  increases  
740 with  $P$  and synaptic strength also changes with  $P$  according to the rules of synaptic  
741 depression. We will restrict this section to the C-DC case. A similar derivation can be  
742 made for the C-Dur case.

743 An *ad hoc* model of synaptic depression can be made using a single variable  $s_d$   
744 which will be a periodic function that denotes the extent of depression and takes on  
745 values between 0 and 1 (Bose et al., 2004).  $s_d$  decays during the AB/PD burst (from  
746 time 0 to  $T_{act}$ , indicating depression) and then recovers during the inter-burst interval  
747 (from  $T_{act}$  to  $P$ , indicating recovery). Thus,  $s_d$  can be described by an equation of the  
748 form:

$$749 \quad \frac{ds_d}{dt} = \begin{cases} -s_d / \tau_\beta & t \pmod{P} \leq T_{act} \\ (1 - s_d) / \tau_\alpha & T_{act} < t \pmod{P} < P \end{cases}$$

750 Using periodicity, it is straightforward to show that the maximum value of  $s_d$ , which  
751 occurs at the start of the AB/PD burst, is given by:

752 
$$s_{max}(P) = \frac{1 - e^{-P(1-DC)/\tau_\alpha}}{1 - e^{-P(1-DC)/\tau_\alpha} e^{-DC \cdot P/\tau_\beta}} \quad (15)$$

753 Note that  $s_{max}$  is a monotonically increasing function with values between 0 and 1. Its  
754 value approaches 1 as  $P$  increases, indicating that the synapse becomes stronger. For  
755 a complete derivation and description, see (Bose et al., 2004). The effect of synaptic  
756 depression on synaptic strength can be obtained by setting

757 
$$g_{max} = \bar{g}_{max} \cdot s_{max}(P) \quad (16)$$

758 where  $s_{max}$  is given by [Equation \(15\)](#).

### 759 *Software, analysis and statistics*

760 Data were analyzed using MATLAB scripts to calculate the time of burst onset  
761 and the phase. Statistical analysis was performed using Sigmaplot 12.0 (Systat).  
762 Significance was evaluated with an  $\alpha$  value of 0.05, error bars and error values  
763 reported denote standard error of the mean (SEM).

### 764 **Acknowledgements**

765 We thank Drs. Horacio Rotstein and Eric Fortune for helping with the initial  
766 MATLAB scripts in the analysis. This study was supported by NIH MH060605 and NSF  
767 DMS1122291.

### 768 **Competing interests**

769 The authors declare no competing financial interests.

### 770 **References**

- 771 Bargmann CI (2012) Beyond the connectome: how neuromodulators shape neural  
772 circuits. *Bioessays* 34:458-465.
- 773 Belluscio MA, Mizuseki K, Schmidt R, Kempter R, Buzsaki G (2012) Cross-frequency  
774 phase-phase coupling between theta and gamma oscillations in the  
775 hippocampus. *J Neurosci* 32:423-435.
- 776 Bidaye SS, Bockemuhl T, Buschges A (2018) Six-legged walking in insects: how CPGs,  
777 peripheral feedback, and descending signals generate coordinated and  
778 adaptive motor rhythms. *J Neurophysiol* 119:459-475.
- 779 Bose A, Manor Y, Nadim F (2004) The activity phase of postsynaptic neurons in a  
780 simplified rhythmic network. *J Comput Neurosci* 17:245-261.

- 781 Brezina V (2010) Beyond the wiring diagram: signalling through complex  
782 neuromodulator networks. *Philos Trans R Soc Lond B Biol Sci* 365:2363-  
783 2374.
- 784 Bucher D, Marder E (2013) SnapShot: Neuromodulation. *Cell* 155:482-482 e481.
- 785 Bucher D, Prinz AA, Marder E (2005) Animal-to-animal variability in motor pattern  
786 production in adults and during growth. *J Neurosci* 25:1611-1619.
- 787 Bucher D, Haspel G, Golowasch J, Nadim F (2015) Central Pattern Generators. *eLS*.
- 788 Buzsaki G, Wang XJ (2012) Mechanisms of gamma oscillations. *Annu Rev Neurosci*  
789 35:203-225.
- 790 Buzsaki G, Tingley D (2018) Space and Time: The Hippocampus as a Sequence  
791 Generator. *Trends in cognitive sciences* 22:853-869.
- 792 Cohen AH, Ermentrout GB, Kiemel T, Kopell N, Sigvardt KA, Williams TL (1992)  
793 Modeling of Intersegmental Coordination in the Lamprey Central Pattern  
794 Generator for Locomotion. *Trends in Neurosciences* 15:434-438.
- 795 Daur N, Nadim F, Bucher D (2016) The complexity of small circuits: the  
796 stomatogastric nervous system. *Curr Opin Neurobiol* 41:1-7.
- 797 Dicaprio R, Jordan G, Hampton T (1997) Maintenance of motor pattern phase  
798 relationships in the ventilatory system of the crab. *J Exp Biol* 200:963-974.
- 799 Eisen JS, Marder E (1984) A mechanism for production of phase shifts in a pattern  
800 generator. *J Neurophysiol* 51:1375-1393.
- 801 Fortune ES, Rose GJ (2001) Short-term synaptic plasticity as a temporal filter.  
802 *Trends Neurosci* 24:381-385.
- 803 Goaillard JM, Taylor AL, Schulz DJ, Marder E (2009) Functional consequences of  
804 animal-to-animal variation in circuit parameters. *Nat Neurosci* 12:1424-  
805 1430.
- 806 Grande LA, Spain WJ (2005) Synaptic depression as a timing device. *Physiology*  
807 (Bethesda, Md) 20:201-210.
- 808 Graubard K, Raper JA, Hartline DK (1980) Graded synaptic transmission between  
809 spiking neurons. *Proc Natl Acad Sci U S A* 77:3733-3735.
- 810 Greenberg I, Manor Y (2005) Synaptic depression in conjunction with A-current  
811 channels promote phase constancy in a rhythmic network. *J Neurophysiol*  
812 93:656-677.
- 813 Grillner S (2006) Biological pattern generation: the cellular and computational logic  
814 of networks in motion. *Neuron* 52:751-766.
- 815 Grillner S, El Manira A (2015) The intrinsic operation of the networks that make us  
816 locomote. *Curr Opin Neurobiol* 31:244-249.
- 817 Gruhn M, Guckenheimer J, Land B, Harris-Warrick RM (2005) Dopamine modulation  
818 of two delayed rectifier potassium currents in a small neural network. *J*  
819 *Neurophysiol* 94:2888-2900.
- 820 Hajos N, Palhalmi J, Mann EO, Nemeth B, Paulsen O, Freund TF (2004) Spike timing  
821 of distinct types of GABAergic interneuron during hippocampal gamma  
822 oscillations in vitro. *J Neurosci* 24:9127-9137.
- 823 Harris-Warrick RM (2011) Neuromodulation and flexibility in Central Pattern  
824 Generator networks. *Curr Opin Neurobiol* 21:685-692.
- 825 Harris-Warrick RM, Johnson BR (2010) Checks and balances in neuromodulation.  
826 *Front Behav Neurosci* 4.

- 827 Harris-Warrick RM, Coniglio LM, Levini RM, Gueron S, Guckenheimer J (1995a)  
828 Dopamine modulation of two subthreshold currents produces phase shifts in  
829 activity of an identified motoneuron. *J Neurophysiol* 74:1404-1420.
- 830 Harris-Warrick RM, Coniglio LM, Barazangi N, Guckenheimer J, Gueron S (1995b)  
831 Dopamine modulation of transient potassium current evokes phase shifts in  
832 a central pattern generator network. *J Neurosci* 15:342-358.
- 833 Hasenstaub A, Shu Y, Haider B, Kraushaar U, Duque A, McCormick DA (2005)  
834 Inhibitory postsynaptic potentials carry synchronized frequency  
835 information in active cortical networks. *Neuron* 47:423-435.
- 836 Hasselmo ME, Bodelon C, Wyble BP (2002) A proposed function for hippocampal  
837 theta rhythm: separate phases of encoding and retrieval enhance reversal of  
838 prior learning. *Neural Comput* 14:793-817.
- 839 Hooper SL (1997a) Phase maintenance in the pyloric pattern of the lobster  
840 (*Panulirus interruptus*) stomatogastric ganglion. *J Comput Neurosci* 4:191-  
841 205.
- 842 Hooper SL (1997b) The pyloric pattern of the lobster (*Panulirus interruptus*)  
843 stomatogastric ganglion comprises two phase-maintaining subsets. *J Comput*  
844 *Neurosci* 4:207-219.
- 845 Hooper SL (1998) Transduction of temporal patterns by single neurons. *Nat*  
846 *Neurosci* 1:720-726.
- 847 Hooper SL, Buchman E, Weaver AL, Thuma JB, Hobbs KH (2009) Slow conductances  
848 could underlie intrinsic phase-maintaining properties of isolated lobster  
849 (*Panulirus interruptus*) pyloric neurons. *J Neurosci* 29:1834-1845.
- 850 Johnson BR, Kloppenburg P, Harris-Warrick RM (2003) Dopamine modulation of  
851 calcium currents in pyloric neurons of the lobster stomatogastric ganglion. *J*  
852 *Neurophysiol* 90:631-643.
- 853 Johnson BR, Schneider LR, Nadim F, Harris-Warrick RM (2005) Dopamine  
854 modulation of phasing of activity in a rhythmic motor network: contribution  
855 of synaptic and intrinsic modulatory actions. *J Neurophysiol* 94:3101-3111.
- 856 Jordan LM, Slawinska U (2011) Chapter 12--modulation of rhythmic movement:  
857 control of coordination. *Prog Brain Res* 188:181-195.
- 858 Katz PS (2016) Evolution of central pattern generators and rhythmic behaviours.  
859 *Philos Trans R Soc Lond B Biol Sci* 371:20150057.
- 860 Kayser C, Montemurro MA, Logothetis NK, Panzeri S (2009) Spike-phase coding  
861 boosts and stabilizes information carried by spatial and temporal spike  
862 patterns. *Neuron* 61:597-608.
- 863 Kiehn O (2016) Decoding the organization of spinal circuits that control locomotion.  
864 *Nat Rev Neurosci* 17:224-238.
- 865 Kloppenburg P, Levini RM, Harris-Warrick RM (1999) Dopamine modulates two  
866 potassium currents and inhibits the intrinsic firing properties of an identified  
867 motor neuron in a central pattern generator network. *J Neurophysiol* 81:29-  
868 38.
- 869 Kopell N, Whittington MA, Kramer MA (2011) Neuronal assembly dynamics in the  
870 beta1 frequency range permits short-term memory. *Proc Natl Acad Sci U S A*  
871 108:3779-3784.

- 872 Krantz SG, Parks HR (2012) The implicit function theorem: history, theory, and  
873 applications: Springer Science & Business Media.
- 874 Kvarda MD, Harris-Warrick RM, Johnson BR (2012) Neuromodulator-evoked  
875 synaptic metaplasticity within a central pattern generator network. *J*  
876 *Neurophysiol* 108:2846-2856.
- 877 Le Gal JP, Dubuc R, Smarandache-Wellmann C (2017) Coordination of Rhythmic  
878 Movements. In: *Neurobiology of Motor Control: Fundamental Concepts and*  
879 *New Directions* (Hooper SL, Buschges A, eds). Hoboken, New Jersey: Wiley-  
880 Blackwell.
- 881 Lindner B A brief introduction to some simple stochastic processes. *Stochastic*  
882 *Methods in Neuroscience* 1.
- 883 Luther JA, Robie AA, Yarotsky J, Reina C, Marder E, Golowasch J (2003) Episodic  
884 bouts of activity accompany recovery of rhythmic output by a  
885 neuromodulator- and activity-deprived adult neural network. *J Neurophysiol*  
886 90:2720-2730.
- 887 Ma C, LaMotte RH (2007) Multiple sites for generation of ectopic spontaneous  
888 activity in neurons of the chronically compressed dorsal root ganglion. *J*  
889 *Neurosci* 27:14059-14068.
- 890 Mamiya A, Nadim F (2004) Dynamic interaction of oscillatory neurons coupled with  
891 reciprocally inhibitory synapses acts to stabilize the rhythm period. *J*  
892 *Neurosci* 24:5140-5150.
- 893 Mamiya A, Manor Y, Nadim F (2003) Short-term dynamics of a mixed chemical and  
894 electrical synapse in a rhythmic network. *J Neurosci* 23:9557-9564.
- 895 Manor Y, Nadim F, Abbott LF, Marder E (1997) Temporal dynamics of graded  
896 synaptic transmission in the lobster stomatogastric ganglion. *J Neurosci*  
897 17:5610-5621.
- 898 Manor Y, Bose A, Booth V, Nadim F (2003) Contribution of synaptic depression to  
899 phase maintenance in a model rhythmic network. *J Neurophysiol* 90:3513-  
900 3528.
- 901 Marder E (2012) Neuromodulation of neuronal circuits: back to the future. *Neuron*  
902 76:1-11.
- 903 Marder E, Bucher D (2001) Central pattern generators and the control of rhythmic  
904 movements. *Curr Biol* 11:R986-996.
- 905 Marder E, Goaillard JM (2006) Variability, compensation and homeostasis in neuron  
906 and network function. *Nat Rev Neurosci* 7:563-574.
- 907 Marder E, Bucher D (2007) Understanding circuit dynamics using the  
908 stomatogastric nervous system of lobsters and crabs. *Annu Rev Physiol*  
909 69:291-316.
- 910 Marder E, O'Leary T, Shruti S (2014) Neuromodulation of circuits with variable  
911 parameters: single neurons and small circuits reveal principles of state-  
912 dependent and robust neuromodulation. *Annu Rev Neurosci* 37:329-346.
- 913 Marder E, Bucher D, Schulz DJ, Taylor AL (2005) Invertebrate central pattern  
914 generation moves along. *Curr Biol* 15:R685-699.
- 915 Markram H, Wang Y, Tsodyks M (1998) Differential signaling via the same axon of  
916 neocortical pyramidal neurons. *Proc Natl Acad Sci U S A* 95:5323-5328.

- 917 Masino MA, Fetcho JR (2005) Fictive swimming motor patterns in wild type and  
918 mutant larval zebrafish. *J Neurophysiol* 93:3177-3188.
- 919 McLelland D, Paulsen O (2009) Neuronal oscillations and the rate-to-phase  
920 transform: mechanism, model and mutual information. *J Physiol* 587:769-  
921 785.
- 922 Mouser C, Nadim F, Bose A (2008) Maintaining phase of the crustacean tri-phasic  
923 pyloric rhythm. *J Math Biol* 57:161-181.
- 924 Mullins OJ, Hackett JT, Buchanan JT, Friesen WO (2011) Neuronal control of  
925 swimming behavior: comparison of vertebrate and invertebrate model  
926 systems. *Prog Neurobiol* 93:244-269.
- 927 Nadim F, Manor Y (2000) The role of short-term synaptic dynamics in motor control.  
928 *Curr Opin Neurobiol* 10:683-690.
- 929 Nadim F, Bucher D (2014) Neuromodulation of neurons and synapses. *Curr Opin*  
930 *Neurobiol* 29:48-56.
- 931 Nadim F, Booth V, Bose A, Manor Y (2003) Short-term synaptic dynamics promote  
932 phase maintenance in multi-phasic rhythms. *Neurocomputing* 52-4:79-87.
- 933 Oren I, Mann EO, Paulsen O, Hajos N (2006) Synaptic currents in anatomically  
934 identified CA3 neurons during hippocampal gamma oscillations in vitro. *J*  
935 *Neurosci* 26:9923-9934.
- 936 Panzeri S, Brunel N, Logothetis NK, Kayser C (2010) Sensory neural codes using  
937 multiplexed temporal scales. *Trends Neurosci* 33:111-120.
- 938 Peck JH, Gaier E, Stevens E, Repicky S, Harris-Warrick RM (2006) Amine modulation  
939 of  $I_h$  in a small neural network. *J Neurophysiol* 96:2931-2940.
- 940 Pulver SR, Bayley TG, Taylor AL, Berni J, Bate M, Hedwig B (2015) Imaging fictive  
941 locomotor patterns in larval *Drosophila*. *J Neurophysiol* 114:2564-2577.
- 942 Rabbah P, Nadim F (2007) Distinct synaptic dynamics of heterogeneous pacemaker  
943 neurons in an oscillatory network. *J Neurophysiol* 97:2239-2253.
- 944 Rosenbaum P, Marder E (2018) Graded Transmission without Action Potentials  
945 Sustains Rhythmic Activity in Some But Not All Modulators That Activate the  
946 Same Current. *J Neurosci* 38:8976-8988.
- 947 Schulz DJ, Goaillard JM, Marder E (2006) Variable channel expression in identified  
948 single and electrically coupled neurons in different animals. *Nat Neurosci*  
949 9:356-362.
- 950 Skinner FK, Mulloney B (1998) Intersegmental coordination in invertebrates and  
951 vertebrates. *Curr Opin Neurobiol* 8:725-732.
- 952 Somogyi P, Klausberger T (2005) Defined types of cortical interneurone structure  
953 space and spike timing in the hippocampus. *J Physiol* 562:9-26.
- 954 Soofi W, Goeritz ML, Kispersky TJ, Prinz AA, Marder E, Stein W (2014) Phase  
955 maintenance in a rhythmic motor pattern during temperature changes in  
956 vivo. *J Neurophysiol* 111:2603-2613.
- 957 Stein PSG (2018) Central pattern generators in the turtle spinal cord: selection  
958 among the forms of motor behaviors. *J Neurophysiol* 119:422-440.
- 959 Stein W (2009) Modulation of stomatogastric rhythms. *J Comp Physiol A Neuroethol*  
960 *Sens Neural Behav Physiol* 195:989-1009.
- 961 Tang LS, Taylor AL, Rinberg A, Marder E (2012) Robustness of a rhythmic circuit to  
962 short- and long-term temperature changes. *J Neurosci* 32:10075-10085.

- 963 Tohidi V, Nadim F (2009) Membrane resonance in bursting pacemaker neurons of  
964 an oscillatory network is correlated with network frequency. *J Neurosci*  
965 29:6427-6435.
- 966 Tseng HA, Nadim F (2010) The membrane potential waveform of bursting  
967 pacemaker neurons is a predictor of their preferred frequency and the  
968 network cycle frequency. *J Neurosci* 30:10809-10819.
- 969 Tseng HA, Martinez D, Nadim F (2014) The frequency preference of neurons and  
970 synapses in a recurrent oscillatory network. *J Neurosci* 34:12933-12945.
- 971 Vidal-Gadea A, Topper S, Young L, Crisp A, Kressin L, Elbel E, Maples T, Brauner M,  
972 Erbguth K, Axelrod A, Gottschalk A, Siegel D, Pierce-Shimomura JT (2011)  
973 *Caenorhabditis elegans* selects distinct crawling and swimming gaits via  
974 dopamine and serotonin. *Proc Natl Acad Sci U S A* 108:17504-17509.
- 975 Wang XJ (2010) Neurophysiological and computational principles of cortical  
976 rhythms in cognition. *Physiol Rev* 90:1195-1268.
- 977 Weimann JM, Meyrand P, Marder E (1991) Neurons that form multiple pattern  
978 generators: identification and multiple activity patterns of gastric/pyloric  
979 neurons in the crab stomatogastric system. *J Neurophysiol* 65:111-122.
- 980 Wenning A, Hill AA, Calabrese RL (2004) Heartbeat control in leeches. II. Fictive  
981 motor pattern. *J Neurophysiol* 91:397-409.
- 982 Wenning A, Norris BJ, Gunay C, Kueh D, Calabrese RL (2018) Output variability  
983 across animals and levels in a motor system. *eLife* 7.
- 984 Zhang C, Guy RD, Mulloney B, Zhang Q, Lewis TJ (2014) Neural mechanism of  
985 optimal limb coordination in crustacean swimming. *Proc Natl Acad Sci U S A*  
986 111:13840-13845.
- 987 Zhang Y, Bose A, Nadim F (2008) Predicting the activity phase of a follower neuron  
988 with A-current in an inhibitory network. *Biol Cybern* 99:171-184.
- 989 Zhang Y, Bose A, Nadim F (2009) The influence of the A-current on the dynamics of  
990 an oscillator-follower inhibitory network. *SIAM J Appl Dyn Syst* 8:1564-1590.
- 991 Zhao S, Sheibanie AF, Oh M, Rabbah P, Nadim F (2011) Peptide neuromodulation of  
992 synaptic dynamics in an oscillatory network. *J Neurosci* 31:13991-14004.
- 993

994 **Figures**

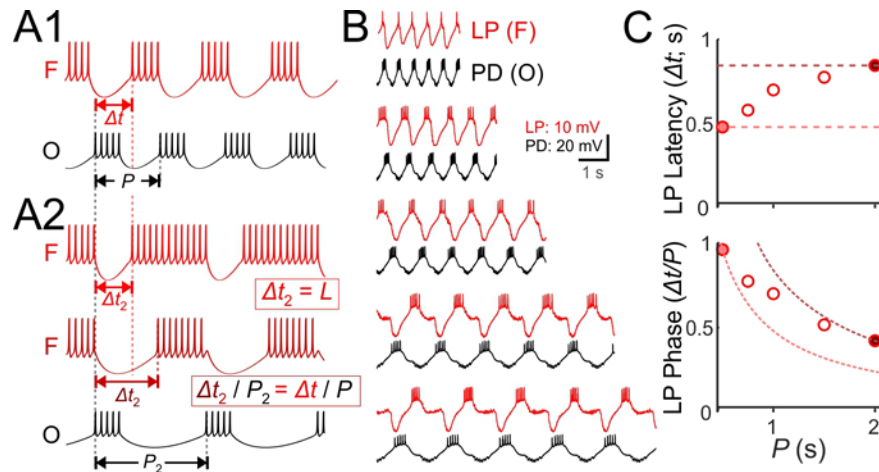

995

996 *Figure 1: Latency constancy and phase constancy as a function of period*

997 **A1.** Schematic diagram showing that a follower neuron (F) strongly inhibited by a  
 998 bursting oscillatory neuron (O) with period  $P$  can produce rebound bursts with the  
 999 same period at a latency  $\Delta t$ . **A2.** If the period of O changes to a new value ( $P_2$ ), the  
 1000 new F burst latency ( $\Delta t_2$ ) typically falls between two extremes: it could stay constant  
 1001 (top trace) or change proportionally to  $P_2$ , so that the burst phase ( $\Delta t / P$ ) remains  
 1002 constant (middle trace). **B.** Example traces of the pyloric pacemaker PD neuron and  
 1003 the follower LP neuron represent the O and F relationship in panel A. Here, the PD  
 1004 neuron is voltage clamped and a pre-recorded waveform of the same neuron is used to  
 1005 drive this neuron to follow different cycle periods. The LP neuron follows the same  
 1006 period because of the synaptic input it receives. **C.** A measurement of the LP neuron  
 1007 burst onset time ( $\Delta t$ ) with respect to the onset of the PD neuron burst shows that  $\Delta t$   
 1008 falls between the two limits of constant latency and constant phase. Dotted curves  
 1009 represent constant latency matched to the latencies at the two extreme  $P$  values.



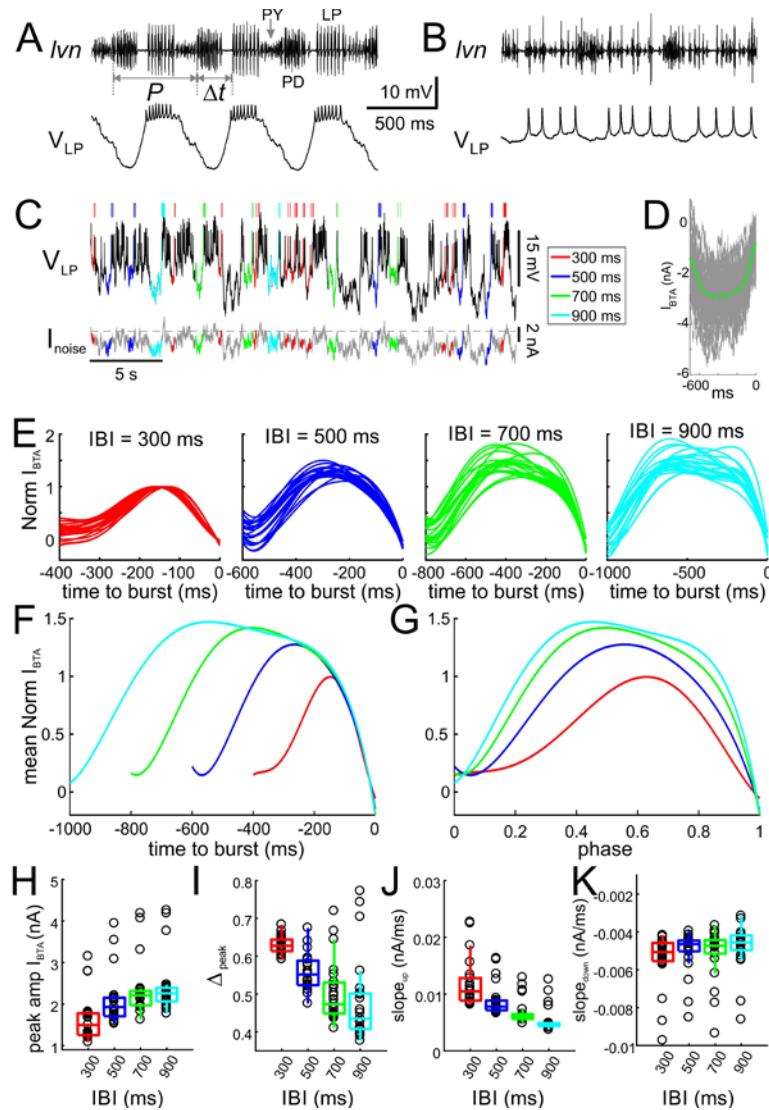

1010

1011 *Figure 2: Inputs to the LP neuron influence burst time, spike number and interval*  
 1012 **A.** Simultaneous intracellular recording of the LP neuron and extracellular recording of  
 1013 the lateral ventricular nerve (*lvn*), containing the axons of the LP, PD and PY neurons  
 1014 (arrows). Period (*P*) and the burst onset time ( $\Delta t$ ) of the LP neuron are defined in  
 1015 reference to the pacemaker group (PD) burst. **B.** Blocking the AB and PY synaptic  
 1016 inputs (10  $\mu$ M picrotoxin) to the LP neuron disrupts its bursting oscillations. **C.** The LP  
 1017 neuron, in picrotoxin, was driven with a noise current input ( $I_{noise}$ ) for 60 minutes. In  
 1018 response, the LP neuron produced an irregular pattern of bursting. Specific inter-burst  
 1019 intervals (*IBIs*) were tagged and used for burst-triggered averaging. **D.** Example of  
 1020 burst-trigger-averaged input current ( $I_{BTA}$ , green). Individual traces are shown in grey.  
 1021 **E.** For each *IBI* (300, 500, 700, 900 ms),  $I_{BTA}$  was calculated and normalized to the  
 1022 (negative) peak value of  $I_{BTA}$  for *IBI*=300 ms. Different traces in each panel show the  
 1023  $I_{BTA}$  of different preparations. **F.** The mean (across preparations) of the normalized  $I_{BTA}$ s  
 1024 shown in panel E. **G.** Traces in panel F normalized by *IBI*. **H-K.** Four parameters define  
 1025 the shape of the  $I_{BTA}$ : peak amplitude  $I_{amp}$  (**H**), peak phase  $\Delta_{peak}$  (**I**), slope<sub>up</sub> (**J**) and  
 1026 slope<sub>down</sub> (**K**) across preparations. *IBI* had a significant effect on amplitude  $I_{amp}$   
 1027 ( $p < 0.001$ ), peak phase  $\Delta_{peak}$  ( $p < 0.001$ ), slope<sub>up</sub> ( $p < 0.001$ ) and slope<sub>down</sub> ( $p = 0.002$ ).

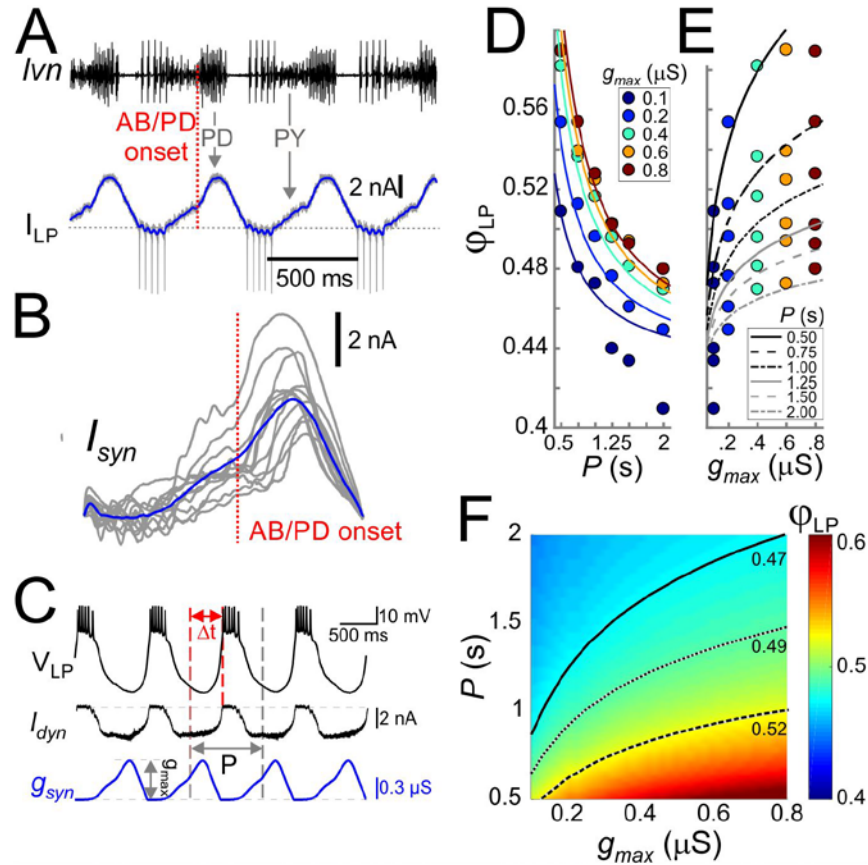

1028

1029 **Figure 3: Cycle period and synaptic strength affect the phase of LP burst onset in**  
 1030 **opposite directions.**

1031 **A.** The synaptic input to the LP neuron was measured by voltage clamping it at a  
 1032 holding potential of -50mV during ongoing oscillations. The onset of the pacemaker  
 1033 (AB/PD) activity is seen as a kink in the synaptic current ( $I_{LP}$ , blue). Dashed line: 0 nA.  
 1034 **B.** Synaptic input averaged across (last 5 of 30) cycles from 9 different LP neurons.  
 1035 Traces are aligned to the onset of the PD neuron burst (dotted vertical red line; see  
 1036 panel A), normalized by the cycle period and terminated at the end of the downslope  
 1037 (coincident with the first LP action potential when present). The blue trace shows the  
 1038 average. **C.** An example of the LP neuron driven by the realistic synaptic waveform in  
 1039 dynamic clamp. The burst onset time ( $\Delta t$ ) was measured relative to the AB/PD onset  
 1040 and used to measure the LP phase ( $\phi_{LP}$ ).  $g_{max}$  denotes the conductance amplitude. **D.**  
 1041 Mean  $\phi_{LP}$  (N=9 preparations) shown as a function of  $P$  and fit with the function given by  
 1042 Equation (8) (fit values  $\tau_s = 26.0$  ms,  $g^* = 0.021$   $\mu$ S and  $\Delta_{peak} \cdot DC = 0.43$ ). **E.** Mean  $\phi_{LP}$   
 1043 plotted against  $g_{max}$  also shown with the fit to Equation (8). **F.** Heat map, obtained from  
 1044 fitting Equation (8) to the data in panels D and E, shows  $\phi_{LP}$  as a function of both  $g_{max}$   
 1045 and  $P$ . Black curves show the level sets of phase constancy for three values of  $\phi_{LP}$   
 1046 (0.47, 0.49, and 0.52).

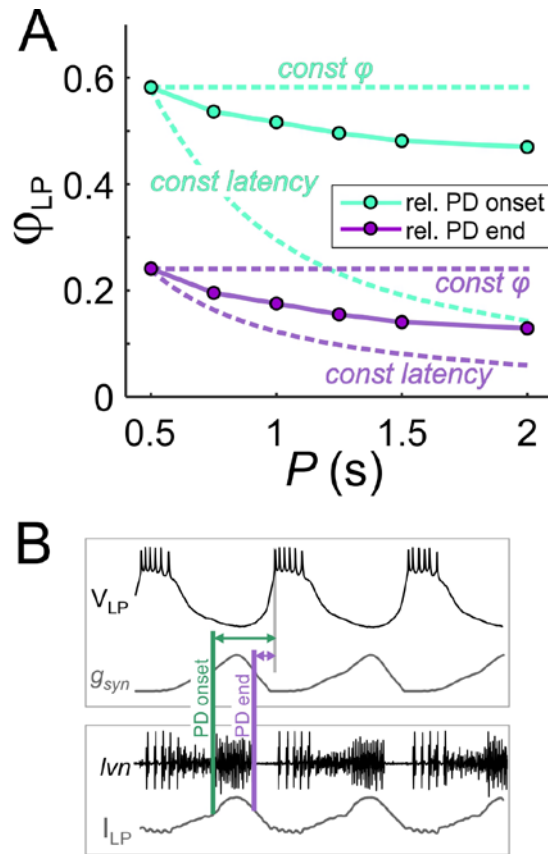

1047

1048 *Figure 4: The constant duty cycle of synaptic conductance is a major factor in phase*  
 1049 *maintenance.*

1050 **A.** The change in  $\phi_{LP}$  values with  $P$  are compared with the constant phase (solid curve)  
 1051 and constant latency (dashed curve) extremes. Lime traces show the usual values of  
 1052  $\phi_{LP}$ , calculated from the LP burst onset latency with respect to the onset of the PD  
 1053 burst. Lavender traces show  $\phi_{LP}$  calculated from the LP burst onset latency with  
 1054 respect to the end of the PD burst. Data shown are the same as in Fig. 3D for  $g_{max}=0.4$   
 1055  $\mu\text{S}$ . **B.** Schematic diagram shows the latency of LP burst onset measured with respect  
 1056 to the (estimated) onset and end of the PD burst in the dynamic clamp experiments  
 1057 (see Methods). Bottom panel shows the synaptic current waveform measured in the  
 1058 voltage-clamped LP neuron during ongoing pyloric activity. Top panel shows the  
 1059 dynamic clamp injection of the synaptic conductance waveform into the LP neuron.  
 1060 The current waveform of the bottom panel is aligned to the conductance waveform of  
 1061 the top panel for the comparison used in determining the PD burst onset and end in the  
 1062 top panel.

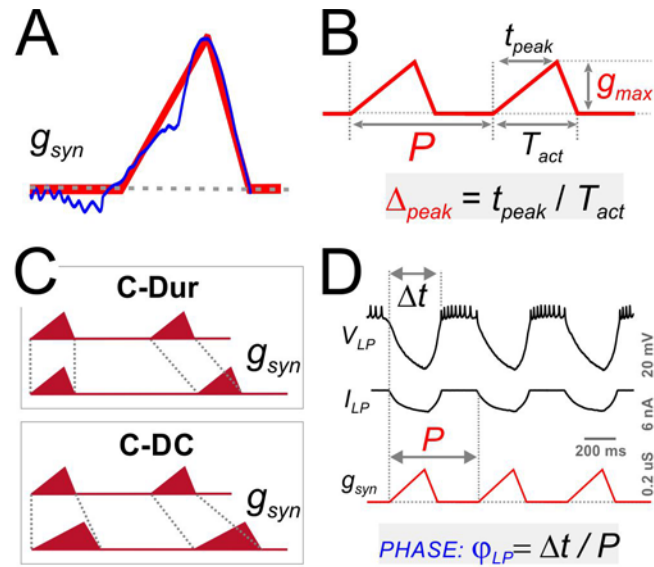

1063

1064 *Figure 5: Four parameters describing synaptic shape were varied in the experimental*  
 1065 *paradigm.*

1066 **A.** A triangle shaped conductance was used to mimic the synaptic input to the LP  
 1067 neuron. **B.** The triangular waveform can be described by period ( $P$ ), duration ( $T_{act}$ ),  
 1068 peak time ( $t_{peak}$ ) and amplitude ( $g_{max}$ ). **C.** In dynamic clamp runs, the synapse duration  
 1069  $T_{act}$  was kept constant at 300 ms (C-Dur) or maintained at a constant duty cycle ( $T_{act}$   
 1070  $/P$ ) of 0.3 (C-DC) across all values of  $P$ . **D.** Intracellular voltage recording of the LP  
 1071 neuron during a dynamic clamp stimulation run using the triangle conductance (in  
 1072 picrotoxin). The burst onset time ( $\Delta t$ , calculated in reference to the synaptic  
 1073 conductance onset) was used to calculate the activity phase ( $\phi_{LP} = \Delta t / P$ ).

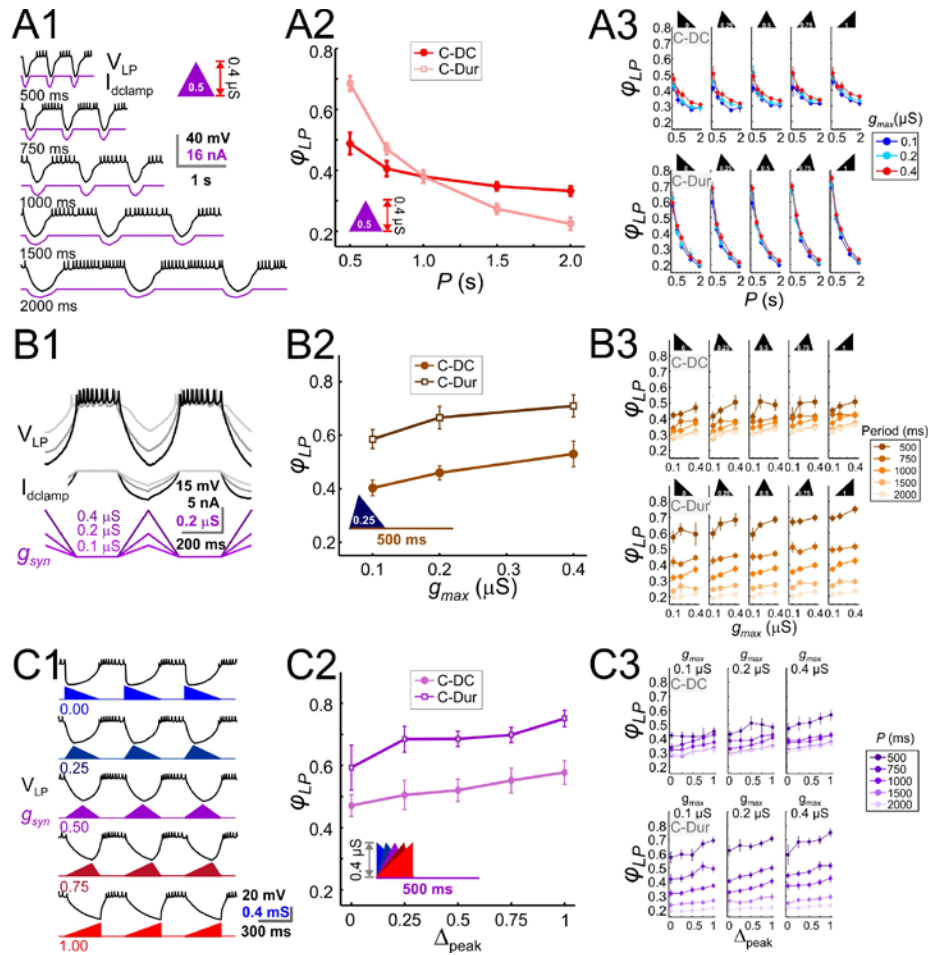

1074

1075 **Figure 6: The LP burst onset phase decreases as a function of  $P$ , but increases as a**  
 1076 **function of  $g_{max}$  and  $\Delta_{peak}$ .**

1077 Periodic injection of an inhibitory triangular waveform conductance into the LP neuron  
 1078 (in picrotoxin) produced bursting activity from which  $\phi_{LP}$  was calculated. The  
 1079 parameters  $g_{max}$ ,  $\Delta_{peak}$  and  $P$  were varied across runs for both C-Dur and C-DC cases.  
 1080 **A.**  $\phi_{LP}$  decreases as a function of  $P$ . **A1.** Intracellular recording of an LP neuron  
 1081 showing a C-DC conductance input across five periods. **A2.**  $\phi_{LP}$  for the example shown in  
 1082 A1 plotted as a function of  $P$  (for  $g_{max} = 0.4 \mu S$ ,  $\Delta_{peak} = 0.5$ ) for both C-Dur and C-DC  
 1083 cases.  $\phi_{LP}$  decreases rapidly with  $P$  and the drop is larger for the C-Dur case. **A3.**  $\phi_{LP}$   
 1084 decreased with  $P$  in both the C-DC case (Three-Way RM ANOVA,  $p < 0.001$ ,  $F = 100.7$ )  
 1085 and the C-Dur case (Three-Way RM ANOVA,  $p < 0.001$ ,  $F = 466.4$ ) for all values of  $\Delta_{peak}$ .  
 1086 The range of  $\phi_{LP}$  drop was greater for the C-Dur case compared to the C-DC case. **B.**  
 1087  $\phi_{LP}$  increases as a function of  $g_{max}$ . **B1.** Intracellular recording of an LP neuron  
 1088 showing the conductance input across three values of  $g_{max}$ . **B2.**  $\phi_{LP}$  for the example shown in  
 1089 B1 plotted as a function of  $P$  (for  $P = 500$  ms,  $\Delta_{peak} = 0.25$ ) shows a small increase for  
 1090 both C-Dur and C-DC cases. **B3.**  $\phi_{LP}$  increased with  $g_{max}$  in almost all trials for both C-  
 1091 DC and C-Dur cases and all values of  $\Delta_{peak}$ . **C.**  $\phi_{LP}$  increases as a function of  $\Delta_{peak}$ . **C1.**  
 1092 Intracellular recording of the LP neuron showing the conductance input for five values  
 1093 of  $\Delta_{peak}$ . **C2.**  $\phi_{LP}$  for the example neuron in C1 plotted as a function of  $\Delta_{peak}$  (for  $P = 500$   
 1094 ms,  $g_{max} = 0.4 \mu S$ ) for both C-DC and C-Dur cases. **C3.**  $\phi_{LP}$  increased with  $\Delta_{peak}$  for  
 1095 both C-DC and C-Dur cases and for all values of  $g_{max}$ . In all panels, error bars show  
 1096 standard deviation.

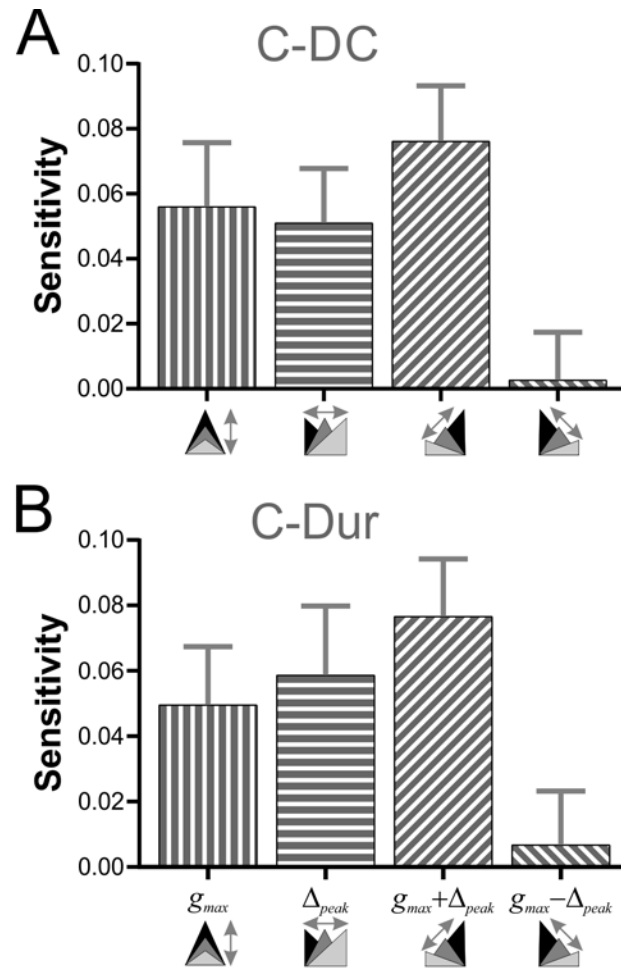

1097

1098 *Figure 7: Sensitivity analysis shows that  $\varphi_{LP}$  increases more effectively if  $g_{max}$  and  $\Delta_{peak}$*   
1099 *increase together.*

1100 **A.** The sensitivity of  $\varphi_{LP}$  to local changes in  $g_{max}$  and  $\Delta_{peak}$  was averaged across all  
1101 values of  $P$  for the C-DC case. Sensitivity was largest if both parameters were  
1102 increased together ( $g_{max} + \Delta_{peak}$ ) and smallest if they were varied in opposite directions  
1103 ( $g_{max} - \Delta_{peak}$ ; One-Way RM-ANOVA,  $p < 0.001$ ,  $F = 3.330$ ). **B.** The same sensitivity  
1104 analysis in the C-Dur case shows similar results (One-Way RM-ANOVA,  $p < 0.001$ ,  
1105  $F = 2.892$ ). In both panels, error bars show standard deviation.

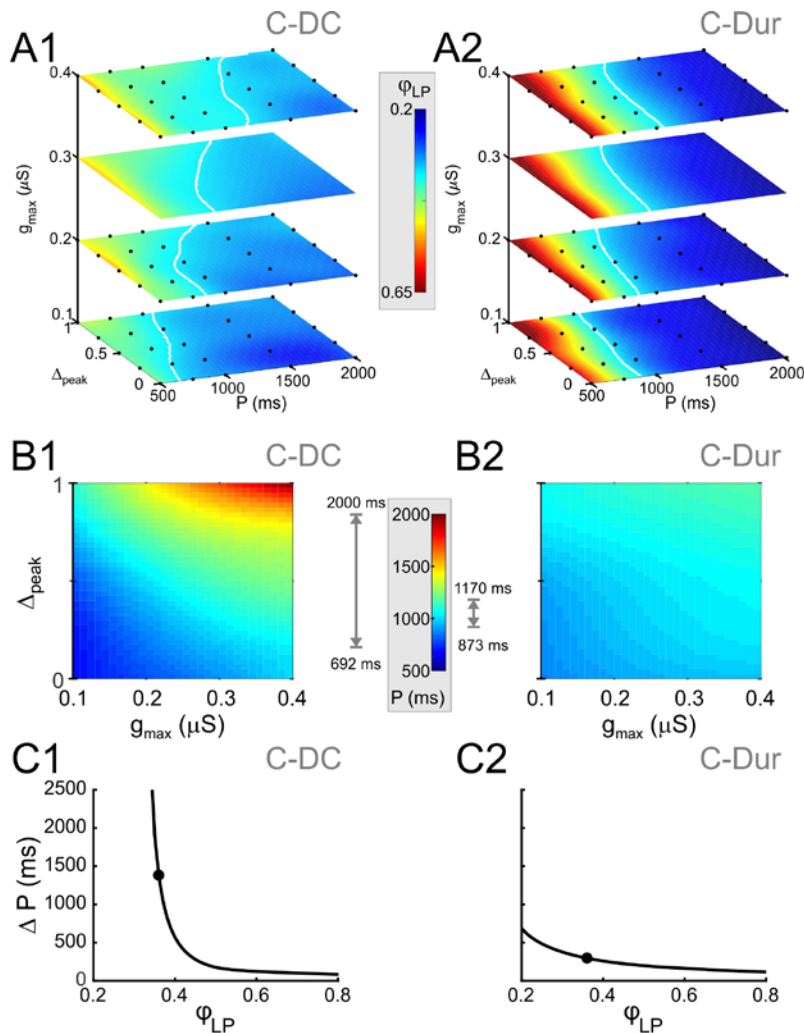

1106

1107 *Figure 8: Simultaneous increase of both  $\Delta_{peak}$  and  $g_{max}$  across their range of values can*  
 1108 *produce phase maintenance across a large  $P$  range in the C-DC case and a much*  
 1109 *smaller  $P$  range in the C-Dur case*

1110 **A.** Heat map plots of the function  $\Phi$  (see Methods), plotted for the range of values of  $P$   
 1111 and  $\Delta_{peak}$  and 4 values of  $g_{max}$  for the C-DC (**A1**) and C-Dur (**A2**) cases. The white  
 1112 curves show the level set of  $\phi_{LP} = 0.34$ , shown as an example of phase constancy. The  
 1113 color maps are interpolated from sampled data (see Methods; N=9 experiments). The  
 1114 locations of the sampled data are marked by black dots. **B.** Heat map for the level sets  
 1115  $\phi_{LP} = 0.34$  for the C-DC (**B1**) and C-Dur (**B2**) cases. Range of colors in each panel  
 1116 indicate the range of  $P$  values for which  $\phi_{LP}$  could remain constant at 0.34 for each  
 1117 case, as indicated by the grey arrows on the side of the heatmap color legend. **C.** The  
 1118 range ( $\Delta P$ ) of  $P$  values for which  $\phi_{LP}$  could remain constant at any value between 0.2  
 1119 and 0.8 for the C-DC (**C1**) and C-Dur cases (**C2**). Filled circles show the values shown  
 1120 in panel B. The LP neuron cannot achieve  $\phi_{LP}$  values below 0.3 in the C-DC case. For  
 1121  $\phi_{LP}$  values between 0.3 and  $\sim 0.65$ , the range was larger in C-DC case.

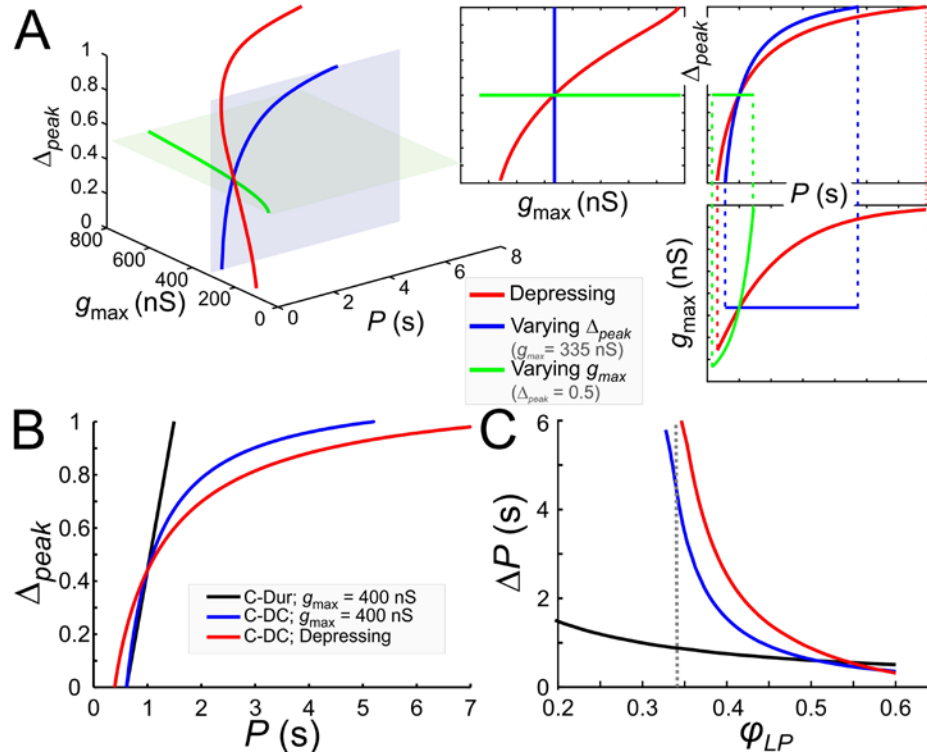

1122

1123 *Figure 9: Model prediction of the range of phase constancy.*

1124 **A.** For the C-DC case, a constant phase of  $\phi_{LP} = 0.34$  can be maintained across a  
 1125 range of cycle periods  $P$  when  $g_{max}$  is constant (at 335 nS; blue plane) and  $\Delta_{peak}$  varies  
 1126 from 0 to 1 according to Equation (11) (blue), or when  $\Delta_{peak}$  is fixed (at 0.5; green  
 1127 plane) and  $g_{max}$  varies from 200 to 800 nS according to Equation (10). Alternatively,  
 1128  $g_{max}$  and  $\Delta_{peak}$  can covary to maintain phase, as in a depressing synapse, where  $g_{max}$   
 1129 varies with  $P$  according to Equation (16), and  $\Delta_{peak}$  is calculated for each  $P$  and  $g_{max}$   
 1130 value according to Equation (11). As seen in the 2D coordinate-plane projections of the  
 1131 3D graph (right three graphs), the range of  $P$  values for which phase constancy is  
 1132 achieved is largest when  $g_{max}$  and  $\Delta_{peak}$  covary (dotted lines show limits of  $P$  for phase  
 1133 constancy). The depressing synapse conductance is chosen to be 335 nS at  $P = 1$  s.  
 1134 **B, C.** A comparison between the C-DC and C-Dur cases shows that in the latter case a  
 1135 constant phase of  $\phi_{LP}$  can be maintained across a larger range of  $P$  values when  $\Delta_{peak}$   
 1136 increases with  $P$  (and  $g_{max}$  is fixed at 400 nS) according to Equation (11). The  
 1137 relationship of  $\Delta_{peak}$  and  $P$  is shown in **B** for  $\phi_{LP} = 0.34$ . **C** shows the range of  $P$  values  
 1138 ( $\Delta P$ ) of cycle periods for which phase remains constant at  $\phi_{LP}$ . If  $g_{max}$  also varies  
 1139 with  $P$ , as in a depressing synapse (red; Equation (16)), the range of  $P$  values for which  
 1140 phase is constant is further increased. (Dotted line:  $\phi_{LP} = 0.34$ .)



1141 **Source Data Files**

1142 **Figure 2-1. File: Figure2\_sourcedata.xlsx**

1143 This Excel file contains 4 sheets, including all measured attributes of the burst-  
1144 triggered average current ( $I_{BTA}$ ) for different IBIs (N=23) as shown in Fig. 2H-2K.

1145 **Figure 7-1. File: Figure7\_sourcedata.xlsx**

1146 This Excel file contains 2 sheets for the C-DC and C-Dur cases. These sheets include  
1147 all sensitivity values for each value of  $P$ , at each  $g_{max}$  and each  $\Delta_{peak}$  in all 8 directions:

1148 ( $+g_{max}$ ,  $+\Delta_{peak}$ ,  $-g_{max}$ ,  $-\Delta_{peak}$ ,  $+g_{max}$  &  $+\Delta_{peak}$ ,  $-g_{max}$  &  $-\Delta_{peak}$ ,  $+g_{max}$  &  $-\Delta_{peak}$ ,  $+g_{max}$  &  $-\Delta_{peak}$ ).

1149 Fig. 7 shows the sensitivities, averaged across all  $P$  values, and averaged

1150 across aligned directions: [ $+g_{max}$  and  $-g_{max}$ ]; [ $+\Delta_{peak}$  and  $-\Delta_{peak}$ ]; [ $+g_{max}$  &  $+\Delta_{peak}$  and  $-g_{max}$  &  $-\Delta_{peak}$ ]; [ $+g_{max}$  &  $-\Delta_{peak}$  and  $-g_{max}$  &  $+\Delta_{peak}$ ].
